# Supplementary material for: Identification of parallel medicinal chemistry protocols to expand branched amine design space
Source: Royal Society of Chemistry journal article supplement (doi:10.1039/d2ob00155a), 2022-01-01

# Identification of Parallel Medicinal Chemistry Protocols to Expand Branched Amine Design Space

*Edward L. Conn,<sup>1</sup> Matthew A. Perry,<sup>1</sup> Kecheng Shi,<sup>2</sup> Guotao Wang,<sup>2</sup> Susan Hoy,<sup>1</sup> Neal W. Sach,<sup>3</sup> Wenying Qi,<sup>2</sup> Liqiang Qu,<sup>2</sup> Yu Gao,<sup>2</sup> Yan Xu,<sup>2</sup> and Daniel C. Schmitt\*<sup>1</sup>*

<sup>1</sup>Pfizer Worldwide R&D, Eastern Point Road, Groton, Connecticut 06340, United States

<sup>2</sup> WuXi AppTec, 288 Fute Zhong Road, Waigaoqiao Free Trade Zone, Shanghai 200131, China

<sup>3</sup> Pfizer Worldwide Research, Development and Medical, 10770 Science Center Drive, San Diego, California 92121, United States

## Supporting Information

### Table of Contents

|                                                               |     |
|---------------------------------------------------------------|-----|
| General Information.....                                      | S2  |
| Experimental Procedures for HTE screen .....                  | S3  |
| General Experimental Procedures .....                         | S5  |
| Characterization Data: Carboxylic Acid Diversity Set.....     | S9  |
| Characterization Data: Aryl Bromide Diversity Set .....       | S21 |
| Characterization Data: Amine Diversity Set .....              | S32 |
| Characterization Data: Aldehyde Diversity Set.....            | S37 |
| Copies of <sup>1</sup> H and <sup>13</sup> C NMR Spectra..... | S50 |

## **General Information**

All reagents were obtained from commercial suppliers and used without further purification, unless otherwise noted. All solvents used were purchased anhydrous and transferred by nitrogen-purged syringe. Silica gel chromatography was performed using medium pressure Biotage or ISCO systems employing columns pre-packaged by various commercial vendors including Biotage and ISCO.  $^1\text{H}$  and  $^{13}\text{C}$  NMR characterization data were collected at 300 K on a Bruker AS-400 spectrometer operating at 400 and 100 MHz (respectively) with chemical shifts reported in parts per million relative to  $\text{CDCl}_3$  ( $^1\text{H}$  NMR: 7.26 ppm;  $^{13}\text{C}$  NMR: 77.2 ppm) or  $\text{DMSO-d}_6$  ( $^1\text{H}$  NMR: 2.50 ppm;  $^{13}\text{C}$  NMR: 39.5 ppm). LC-MS were acquired using a Waters Acquity UPLC equipped with a Waters Acquity HSS T3 column, water/MeCN gradient and 0.1% v/v formic acid as modifier. Redox-active esters **1** were prepared and reacted in-situ as described in General Library Protocol A or isolated by the procedure of Baran and coworkers.<sup>1</sup> Imines **2** were prepared and reacted in-situ as described in General Library Protocol D or prepared by the procedure of DeBoef and coworkers<sup>2</sup> and used without purification. All reactions were performed on the benchtop under  $\text{N}_2$  or air atmosphere, with the exception of the high-throughput conditions screen, which was performed in a glove-box.

1. Cornella, J.; Edwards, J. T.; Qin, T.; Kawamura, S.; Wang, J.; Pan, C.-M.; Gianatassio, R.; Schmidt, M.; Eastgate, M. D.; Baran, P. S., Practical Ni-Catalyzed Aryl-Alkyl Cross-Coupling of Secondary Redox-Active Esters. *J. Am. Chem. Soc.* **2016**, *138* (7), 2174-2177.
2. Sirois, J. J.; Davis, R.; DeBoef, B., Iron-Catalyzed Arylation of Heterocycles via Directed C-H Bond Activation. *Org. Lett.* **2014**, *16* (3), 868-871.

## Experimental Procedures for High Throughput Experimentation (HTE)

A HTE screen was completed on a miniature scale (0.001mmol) examining the key variables of reductant and catalyst. In total 53 catalysts were screened against 4 reductant sources in a total matrix of 212 combinations. The remaining variables were held constant according to the protocol described below.

### A. Micromole scale optimization of decarboxylative imine addition

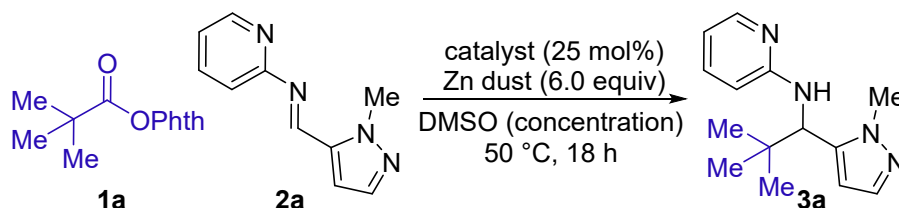

Scale: 0.001 mmol **2a**. Concentration: 0.01 M

### Variables List - Catalysts

| No. | Identifier   | Base                                                 | No. | Identifier   | Solvent                                                                                          |
|-----|--------------|------------------------------------------------------|-----|--------------|--------------------------------------------------------------------------------------------------|
| 1   | MFCD00011004 | FeCl <sub>2</sub>                                    | 23  | None         | _Blank                                                                                           |
| 2   | MFCD00011005 | FeCl <sub>3</sub>                                    | 24  | None         | (BPhen)NiCl <sub>2</sub> .DMA2                                                                   |
| 3   | MFCD00149709 | FeCl <sub>2</sub> ·4H <sub>2</sub> O                 | 25  | 2230140-51-7 | NHC-Ni-1                                                                                         |
| 4   | MFCD00016082 | FeBr <sub>3</sub>                                    | 26  | 2067359-93-5 | C <sub>4</sub> F <sub>12</sub> N <sub>2</sub> NiO <sub>8</sub> S <sub>4</sub> ·xH <sub>2</sub> O |
| 5   | MFCD00000020 | Fe(acac) <sub>3</sub>                                | 27  | MFCD00009592 | Ni(P(Ph) <sub>3</sub> ) <sub>2</sub> Cl <sub>2</sub>                                             |
| 6   | MFCD15144785 | Fe(OTf) <sub>3</sub>                                 | 28  | MFCD25563227 | Ni(P(Cy <sub>2</sub> Ph) <sub>2</sub> )Cl <sub>2</sub>                                           |
| 7   | MFCD00066973 | Ni(OAc) <sub>2</sub> ·2.4H <sub>2</sub> O            | 29  | MFCD00270284 | Ni(dppf)Cl <sub>2</sub>                                                                          |
| 8   | MFCD00013481 | NiCl <sub>2</sub> .DME                               | 30  | MFCD11973802 | Ni(P(Cy) <sub>3</sub> ) <sub>2</sub> Cl <sub>2</sub>                                             |
| 9   | MFCD00150259 | Ni(BF <sub>4</sub> ) <sub>2</sub> ·6H <sub>2</sub> O | 31  | MFCD28144558 | Ni(P(Ph) <sub>3</sub> ) <sub>2</sub> TolCl                                                       |
| 10  | MFCD00149809 | NiCl <sub>2</sub> ·6H <sub>2</sub> O                 | 32  | MFCD27978415 | Ni(P(Cy <sub>2</sub> Ph) <sub>2</sub> TolCl                                                      |
| 11  | MFCD00066973 | Ni(OAc) <sub>2</sub> ·2.4H <sub>2</sub> O            | 33  | 2049086-34-0 | SK-J002-1n                                                                                       |
| 12  | MFCD00000024 | Ni(acac) <sub>2</sub>                                | 34  | MFCD28411349 | (dppf)Ni(o-tolyl)Cl                                                                              |
| 13  | MFCD00149058 | Ni(acac) <sub>2</sub> ·xH <sub>2</sub> O             | 35  | MFCD00015865 | Ni(P(Ph) <sub>3</sub> ) <sub>2</sub> Br <sub>2</sub>                                             |
| 14  | MFCD00058902 | Ni(COD) <sub>2</sub>                                 | 36  | MFCD06800434 | ClNi(Nap)(PPh <sub>3</sub> ) <sub>2</sub>                                                        |
| 15  | MFCD00149805 | Ni(NO <sub>3</sub> ) <sub>2</sub> ·6H <sub>2</sub> O | 37  | MFCD28100473 | [(dppf)Ni(cinnamyl)Cl]                                                                           |
| 16  | MFCD29037017 | NiCl(o-tolyl)(TMEDA)                                 | 38  | 2049086-37-3 | SK-J014-1n                                                                                       |
| 17  | MFCD00016264 | NiI <sub>2</sub>                                     | 39  | 2049086-36-2 | SK-J004-1n                                                                                       |
| 18  | MFCD17015253 | Nickamine                                            | 40  | 2091838-72-9 | Strem 28-1040                                                                                    |
| 19  | MFCD00274339 | NiBr <sub>2</sub> ·2MEE                              | 41  | None         | [(dppf)Ni(cinnamyl)]ZnCl <sub>3</sub>                                                            |
| 20  | MFCD00192348 | Ni(TMHD) <sub>2</sub>                                | 42  | MFCD00010011 | Ni(PPh <sub>3</sub> ) <sub>4</sub>                                                               |
| 21  | MFCD00013313 | Ni(dppe)Cl <sub>2</sub>                              | 43  | 2091838-72-9 | NHC-Ni-1                                                                                         |
| 22  | MFCD00015318 | Ni(dppp)Cl <sub>2</sub>                              |     |              |                                                                                                  |

## Variables List - Reductants

| No. | Identifier  | Reductant      |
|-----|-------------|----------------|
| 1   | MFC00011291 | Zn Dust        |
| 2   | MFC00011291 | Zn Nano        |
| 3   | MFC00009601 | TDAE           |
| 4   | MFC00005951 | Hantzsch ester |

The reactions were set-up in a two 96-well arrays using miniature 8x20mm 0.2ml glass vials conditions following the procedure:

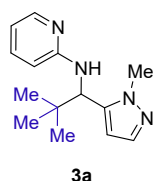

**N-(2,2-dimethyl-1-(1-methyl-1H-pyrazol-5-yl)propyl)pyridin-2-amine.** To a 8x20mm 0.2mL glass vial pre-equipped with stir bar was dispensed DMSO (50uL, 0.02M) was first dispensed before the **imine, 2a** (5uL, 1eq., as 0.2M solution in DMSO) and **redox active ester, 1a** (5uL, 2eq., as 0.4M solution in DMSO) added.

The reaction was stirred before **catalyst** (10uL, 0.25eq., added as a 0.025M suspension in DMSO) and **reductant** (50uL, 6eq., added as a 0.12M suspension in DMSO) dosed. The reaction was crimp sealed to the glove-box environment before being stirred overnight at 50C for 18hrs. After this period the reaction was cooled, centrifuged, diluted with ACN (200uL) and directly analyzed.

The TIBCO Spotfire® Analysis below presents product by %Area UV (vertical axis), product by mass ion count (horizontal axis, in good correlation), catalyst (color-see legend), reductant (trellis-see title), temperature (trellis-see title) and solvent (trellis-see title). The highest vertical spots represent the preferred conditions.

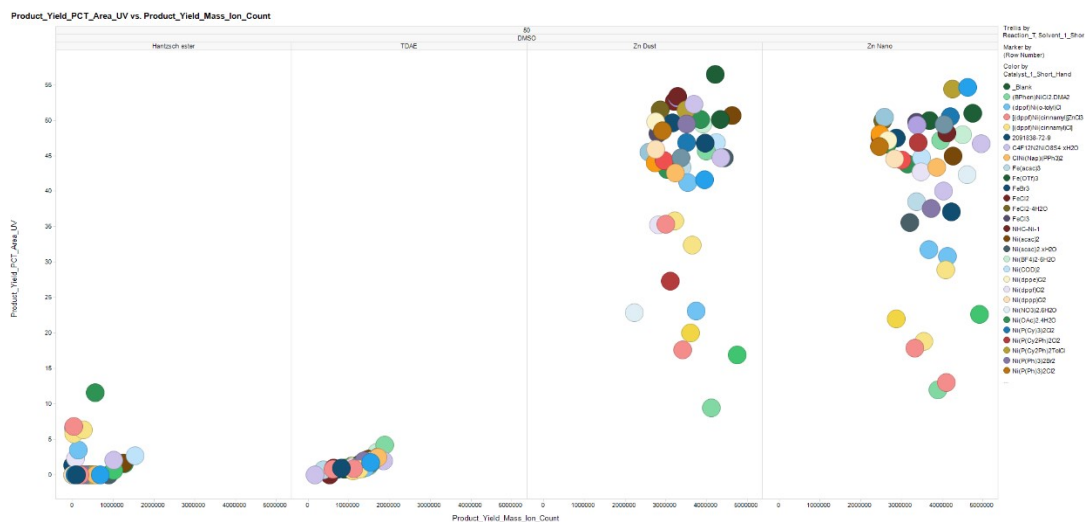

**Visualization of variables effects in the formation of N-(2,2-dimethyl-1-(1-methyl-1H-pyrazol-5-yl)propyl)pyridin-2-amine.**

## **General Library Procedure A: Synthesis of branched amines from the aliphatic carboxylic acid diversity set**

Stage 1 (redox-active ester formation): To a dried round bottom flask under nitrogen atmosphere was added NHPI (2 equiv per reaction, 33 mg, 0.20 mmol) and DMAP (20 mol% per reaction, 2.4 mg, 0.020 mmol). The flask was purged with nitrogen for 5 min, then  $\text{CH}_2\text{Cl}_2$  (1.0 mL per reaction) was added. The resulting mixture was stirred rapidly for 10 min to provide a suspension. A plate of 1-dram vials with septum caps under air atmosphere were each charged with a unique carboxylic acid and stir bar. Using an 18-gauge needle to prevent clogging, the NHPI/DMAP/ $\text{CH}_2\text{Cl}_2$  suspension was added (1.0 mL per vial). The vials were stirred at 23 °C for 5 min, then DIC (2.2 equiv per reaction, 34  $\mu\text{L}$ , 0.22 mmol) was added via syringe. The resulting mixture was stirred at ambient temperature for 24 h, then each vial was concentrated in parallel under a stream of nitrogen to provide the redox-active ester intermediates.

Stage 2 (decarboxylative imine addition): To a dried round bottom flask under nitrogen atmosphere was added imine **2a** (1 equiv per reaction, 19 mg, 0.1 mmol) and  $\text{NiI}_2$  (25 mol% per reaction, 7.8 mg, 0.025 mmol). The flask was purged with  $\text{N}_2$  and DMSO was added (0.2 mL per reaction). The flask was stirred at 23 °C for 10 min to provide a suspension. To 1-dram vials containing redox-active esters (from Stage 1) was added Zn powder (approximately 6 equiv per reaction, 39 mg, 0.6 mmol) via calibrated scoop. Using one vacuum line fitted with a 20 gauge needle and one  $\text{N}_2$  line fitted with a 20 gauge needle, each vial was evacuated for ~10 seconds, then backfilled with  $\text{N}_2$  (repeated the purging/backfill sequence once). The imine/ $\text{NiI}_2$ /DMSO suspension was then added to each vial (0.2 mL per reaction). The vials were then stirred at 50 °C for 48 h. The vials were cooled to 23 °C and diluted with  $\text{CH}_2\text{Cl}_2$  (2 mL) and brine (1 mL). The organic phase was filtered through a prepacked  $\text{Na}_2\text{SO}_4$  plug and concentrated via genevac. The resulting crude branched amines were dissolved in 1 mL DMSO and submitted for high-throughput purification (column: Waters Sunfire C18 19x100, 5 $\mu$ ; Mobile phase A: 0.05% TFA in water (v/v); Mobile phase B: 0.05% TFA in acetonitrile (v/v)).

## **General Procedure B: Aryl/alkyl branched amine synthesis from pre-isolated redox-active esters (3a, 3u-3y)**

To a 1-dram vial with a stir bar and septum cap was added imine **2** (0.25 mmol, 1.0 equiv), redox-active ester **1** (0.50 mmol, 2.0 equiv),  $\text{NiI}_2$  (20 mg, 0.0625 mmol, 0.25 equiv), and Zn powder (98 mg, 1.5 mmol, 6 equiv). The vial was placed under vacuum and backfilled with  $\text{N}_2$  (3 cycles). DMSO (0.5 mL, 0.5 M) was added via syringe. The septum cap was replaced with an unpunctured septum cap. The vial was stirred and heated to 50 °C. After 24 h the reaction was cooled to 23 °C. The solution was concentrated in vacuo via Genevac vacuum centrifuge and purified by flash column chromatography using the solvent system indicated. *Alternative (non-Genevac) workup:* After 24 h the reaction was cooled to 23 °C and diluted with EtOAc (20 mL). The solution was washed with saturated LiCl (aq) (2 X 20 mL). The combined aqueous phases were extracted with EtOAc (20 mL). The combined organic phases were dried over  $\text{Na}_2\text{SO}_4$ , filtered, and concentrated in vacuo. The crude compounds were purified by flash column chromatography using the solvent system indicated.

## **General Library Procedure C: Synthesis of branched amines from the heteroaryl bromide diversity set**

Stage 1 (aryl lithium formation): 2-dram vials with septum caps and stir bars in a 6X4 rack were charged with aryl bromide (0.45 mmol per reaction, 1.5 equiv). The vials were sequentially evacuated for 10 seconds and backfilled with N<sub>2</sub>. THF (1.4 mL per reaction) was added. The vial rack was submerged in a Tupperware container on a stir plate containing dry ice / acetone at -78 °C. Upon cooling, each vial was evacuated/backfilled with N<sub>2</sub> two more times. n-BuLi (2.5 M in hexanes) (0.18 mL per reaction, 0.45 mmol, 1.5 equiv) was added via syringe. The vials were stirred at -78 °C for 30 min.

Stage 2 (imine addition): In a separate round bottom flask under N<sub>2</sub> atmosphere, the crude imine (0.30 mmol per reaction) was dissolved in THF (2 mL per reaction). The imine solution in THF was added to each vial at -78 °C (2 mL per reaction). The vials were slowly warmed to 23 °C over 24 h. The reactions were quenched with 5% AcOH in EtOAc (v/v) (0.5 mL per vial). Brine (1 mL per vial) was added. The organic phase was filtered through a prepacked Na<sub>2</sub>SO<sub>4</sub> plug and concentrated using Genevac EZ-2 Elite. The resulting crude branched amines were dissolved in 1 mL DMSO and submitted for high-throughput purification (column: Waters Sunfire C18 19x100, 5μ; Mobile phase A: 0.05% TFA in water (v/v); Mobile phase B: 0.05% TFA in acetonitrile (v/v)).

## **General Library Procedure D: Synthesis of branched amines from the aldehyde & heteroaryl amine diversity sets**

Stage 1 (imine formation): To a 2-dram vial containing the aldehyde (0.2 mmol, 1.3 equiv) in a 6X4 vial rack was added a solution of the heteroaryl amine (0.15 mmol, 1.0 equiv) in toluene (1 mL per vial). 3 Å molecular sieves (250 mg per vial) were then added and reaction vials were capped. The vials were heated to 100 °C and shaken on a shaker plate for 16 h. The reaction mixtures were cooled to 23 °C and transferred to new 2-dram vials via pipette. Molecular sieves were rinsed with acetone (2 X 1 mL) via pipette. The combined solvent was removed using a Genevac EZ-2 Elite to give the crude imines.

Stage 2 (Grignard addition): The crude imines were dissolved in tetrahydrofuran (1 mL per vial) and the vials were sealed. A solution of phenyl magnesium bromide (3.0 M in Et<sub>2</sub>O) (0.2 mL per vial, 0.6 mmol, 4 equiv) was added at 23 °C. The reaction mixtures were then heated to 50 °C and shaken for 16 h. Reactions were cooled to 23 °C then treated with a 5% acetic acid / ethyl acetate mixture (2 mL per vial) followed by a brine solution (2 mL). The organic layers were transferred to separate 2-dram vials and the aqueous layers were extracted with additional ethyl acetate (2 mL). The combined organic phases were filtered through prepacked Na<sub>2</sub>SO<sub>4</sub> plugs and concentrated in parallel using Genevac EZ-2 Elite. The resulting crude branched amines were dissolved in 1 mL DMSO and submitted for high-throughput purification (column: Waters Sunfire C18 19x100, 5µ; Mobile phase A: 0.05% TFA in water (v/v); Mobile phase B: 0.05% TFA in acetonitrile (v/v)).

## Characterization Data: Carboxylic Acid Diversity Set

**Characterization Data for Branched Amine Compounds** Following precedence for library chemistry,<sup>3,4</sup> compounds generated via library protocols were isolated by HPLC and characterized by low-resolution mass spectrometry; a subset of compounds from each library protocol were fully characterized.

3. Ni, S.; Padial, N. M.; Kingston, C.; Vantourout, J. C.; Schmitt, D. C.; Edwards, J. T.; Kruszyk, M. M.; Merchant, R. R.; Mykhailiuk, P. K.; Sanchez, B. B.; Yang, S.; Perry, M. A.; Gallego, G. M.; Mousseau, J. J.; Collins, M. R.; Cherney, R. J.; Lebed, P. S.; Chen, J. S.; Qin, T.; Baran, P. S., A Radical Approach to Anionic Chemistry: Synthesis of Ketones, Alcohols, and Amines. *J. Am. Chem. Soc.* **2019**, *141* (16), 6726-6739.
4. Deeming, A. S.; Russell, C. J.; Willis, M. C., Combining Organometallic Reagents, the Sulfur Dioxide Surrogate DABSO, and Amines: A One-Pot Preparation of Sulfonamides, Amenable to Array Synthesis. *Angew. Chem. Int. Ed.* **2015**, *54* (4), 1168-1171.

### *N*-(2,2-dimethyl-1-(1-methyl-1H-pyrazol-5-yl)propyl)pyridin-2-amine (**3a**)

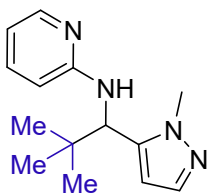

Prepared according to general procedure B (0.10 mmol scale). Purification via flash column chromatography (linear gradient: 1% MeOH / CH<sub>2</sub>Cl<sub>2</sub> to 10% MeOH / CH<sub>2</sub>Cl<sub>2</sub>) provided 12 mg (49% yield); <sup>1</sup>H NMR (400 MHz, DMSO-d<sub>6</sub>) δ = 8.00 (d, *J* = 4.3 Hz, 1H) (m, 1H), 7.77 (br s, 1H), 7.35 (d, *J* = 1.2 Hz, 1H), 7.02 (br s, 1H), 6.77 (br s, 1H), 6.27 (s, 1H), 5.10 (d, *J* = 7.4 Hz, 1H), 3.91 (s, 3H), 0.97 (s, 9H); <sup>13</sup>C NMR (101 MHz, DMSO-d<sub>6</sub>) δ = 159.40, 159.14, 158.87, 137.97, 118.18, 115.82, 112.89, 105.09, 55.45, 37.64, 36.83, 26.33; HRMS (ESI) *m/z*: [M + H]<sup>+</sup> calcd for C<sub>14</sub>H<sub>20</sub>N<sub>4</sub>, 245.1761; found, 245.1768.

### *N*-(3-(3-bromophenyl)-1-(1-methyl-1H-pyrazol-5-yl)propyl)pyridin-2-amine (**3b**)

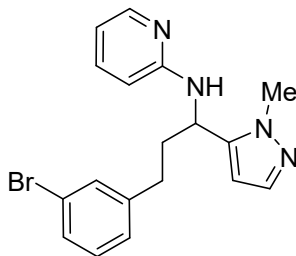

Prepared in parallel format according to Library Procedure A. 6.4 mg isolated; <sup>1</sup>H NMR (400 MHz, DMSO-d<sub>6</sub>) δ = 7.97 (d, *J* = 4.7 Hz, 1H), 7.73 (br s, 1H), 7.44 (s, 1H), 7.40-7.37 (m, 1H), 7.32 (d, *J* = 1.4 Hz, 1H), 7.26-7.22 (m, 2H), 6.88 (br s, 1H), 6.75 (br s, 1H), 6.25 (d, *J* = 1.4 Hz, 1H), 5.09 (d, *J* = 4.7 Hz, 1H), 3.77 (s, 3H), 2.74-2.66 (m, 2H), 2.16-2.10 (m, 2H); <sup>13</sup>C NMR (101 MHz, DMSO-d<sub>6</sub>) δ = 157.98,

143.87, 137.46, 131.05, 130.47, 128.85, 127.42, 121.67, 117.74, 115.38, 112.56, 112.50, 103.67, 99.49, 46.64, 36.53, 35.78, 31.23; HRMS (ESI)  $m/z$ :  $[M + H]^+$  calcd for  $C_{18}H_{19}BrN_4$ , 371.0866; found, 371.0866.

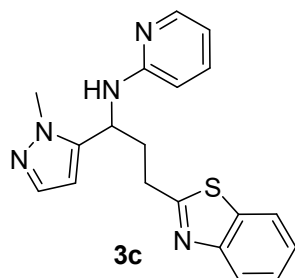

4.0 mg product obtained. LC-MS data – Ret. time 1.7: MS ES+  $m/z$  350 ( $[M+H]^+$ ).

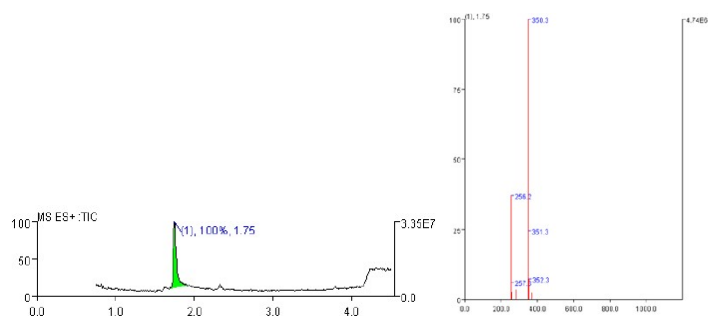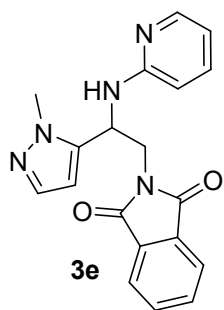

3.8 mg product obtained. LC-MS data – Ret. time 1.48: MS ES+  $m/z$  348 ( $[M+H]^+$ ).

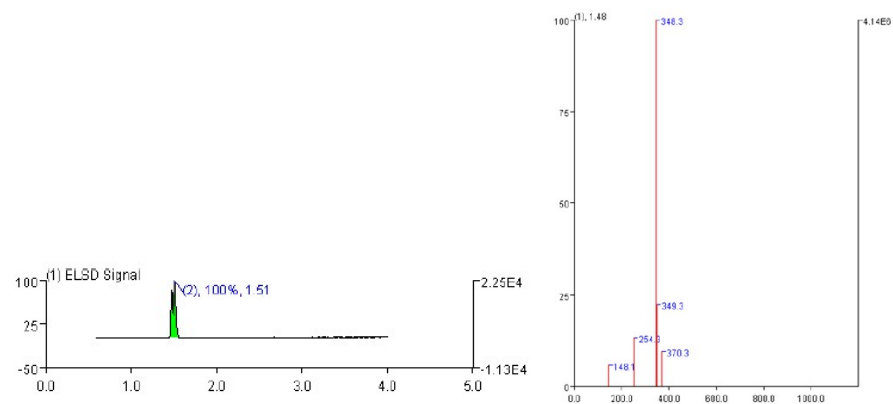

*tert*-butyl (2-(1-methyl-1H-pyrazol-5-yl)-2-(pyridin-2-ylamino)ethyl)carbamate (**3f**)

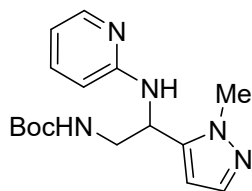

Prepared in parallel format according to Library Procedure A. 10.2 mg isolated;  $^1\text{H}$  NMR (400 MHz,  $\text{CDCl}_3$ )  $\delta$  = 7.89-7.77 (m, 1H), 7.73 (t,  $J$  = 7.8 Hz, 1H), 7.43 (d,  $J$  = 1.6 Hz, 1H), 6.79 (t,  $J$  = 6.6 Hz, 1H), 6.53 (d,  $J$  = 9.0 Hz, 1H), 6.24 (d,  $J$  = 1.6 Hz, 1H), 5.58-5.56 (m, 1H), 4.97 (dd,  $J$  = 1.6 Hz, 4.7 Hz, 1H), 4.03 (s, 3H), 3.69-3.63 (m, 1H), 3.45-3.38 (m, 1H), 1.43 (s, 9H).  $^{13}\text{C}$  NMR (101 MHz,  $\text{DMSO-d}_6$ )  $\delta$  = 156.26, 154.20, 143.75, 139.11, 139.01, 134.29, 112.49, 110.23, 104.84, 80.05, 50.01, 44.60, 37.00, 28.31; HRMS (ESI)  $m/z$ :  $[\text{M} + \text{H}]^+$  calcd for  $\text{C}_{16}\text{H}_{23}\text{N}_5\text{O}_2$ , 318.1925; found, 318.1932.

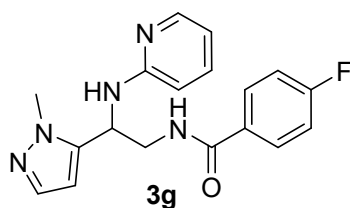

2.7 mg product obtained. LC-MS data – Ret. time 1.54: MS ES+  $m/z$  340 ( $[\text{M} + \text{H}]^+$ ).

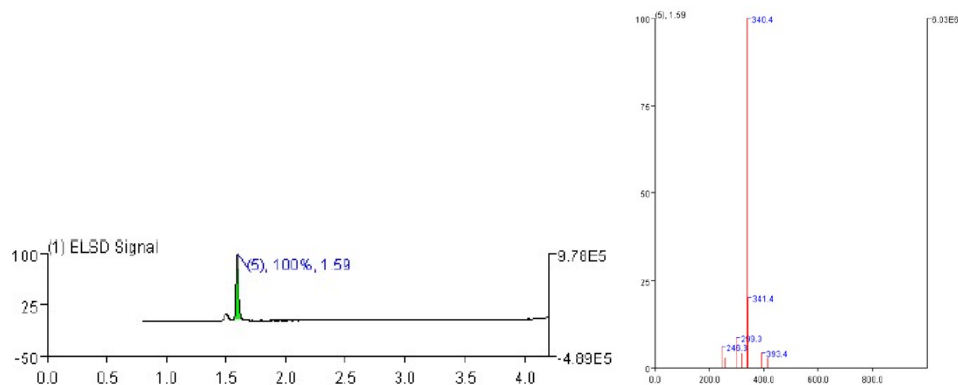

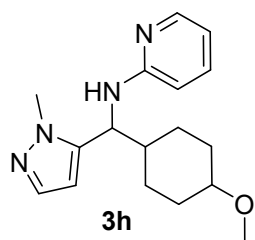

2.5 mg product obtained. LC-MS data – Ret. time 1.3: MS ES+  $m/z$  301 ( $[M+H]^+$ ).

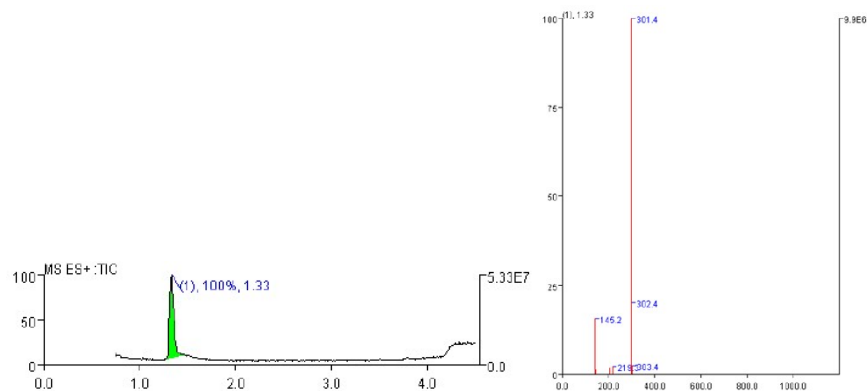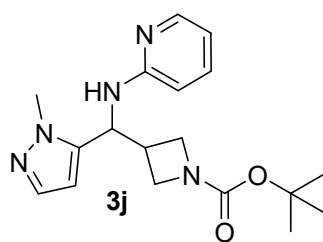

3.3 mg product obtained. LC-MS data – Ret. time 1.48: MS ES+  $m/z$  344 ( $[M+H]^+$ ).

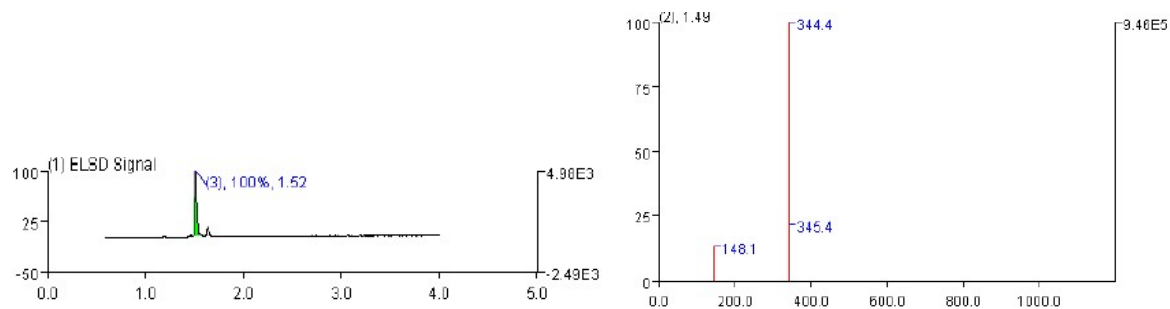

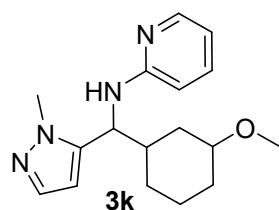

2.6 mg product obtained. LC-MS data – Ret. time 1.36, 1.48: MS ES+  $m/z$  301 ( $[M+H]^+$ ).

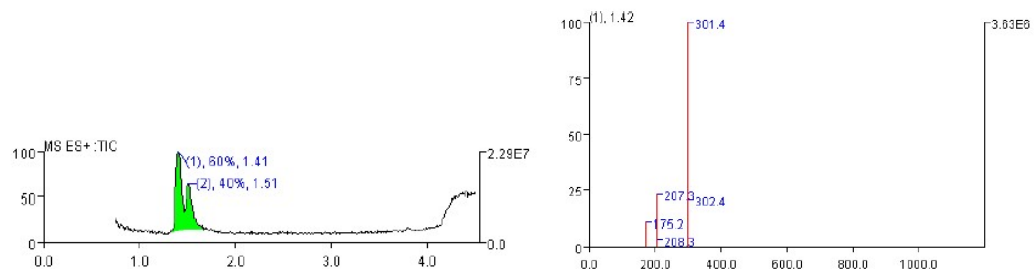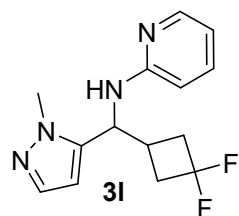

1.6 mg product obtained. LC-MS data – Ret. time 1.41: MS ES+  $m/z$  279 ( $[M+H]^+$ ).

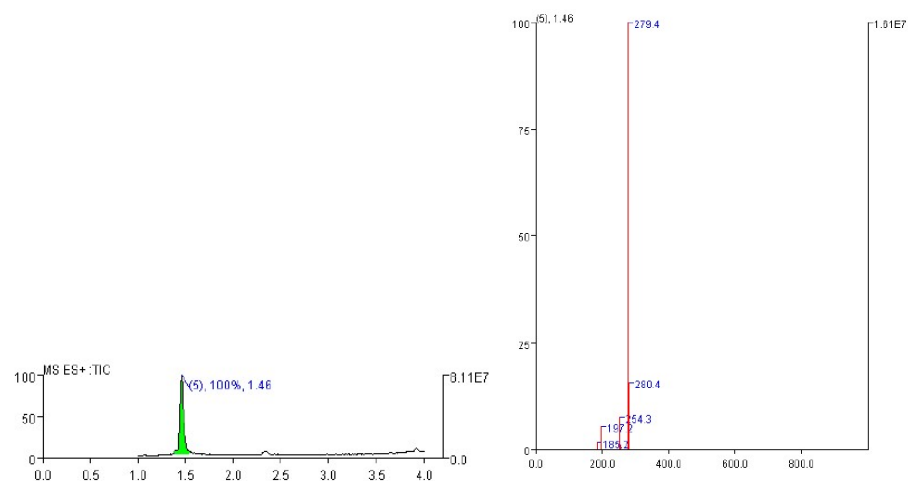

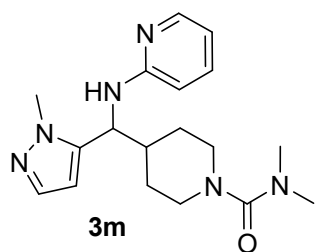

3.2 mg product obtained. LC-MS data – Ret. time 1.27: MS ES+  $m/z$  343 ( $[M+H]^+$ ).

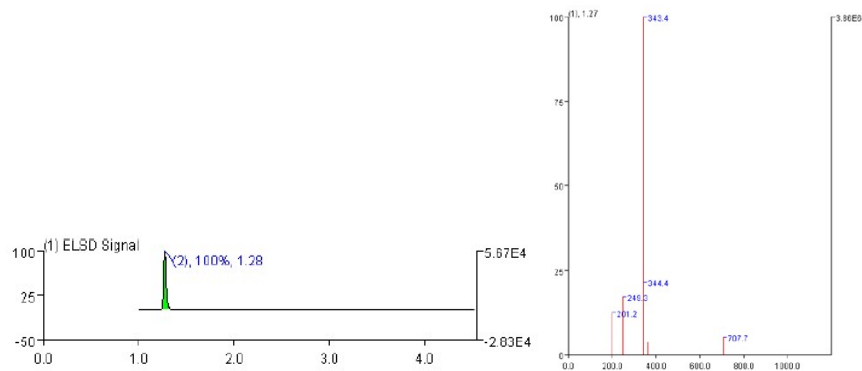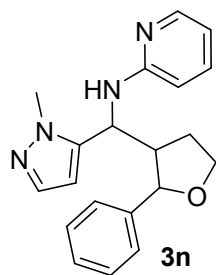

5.7 mg product obtained. LC-MS data – Ret. time 1.48: MS ES+  $m/z$  335 ( $[M+H]^+$ ).

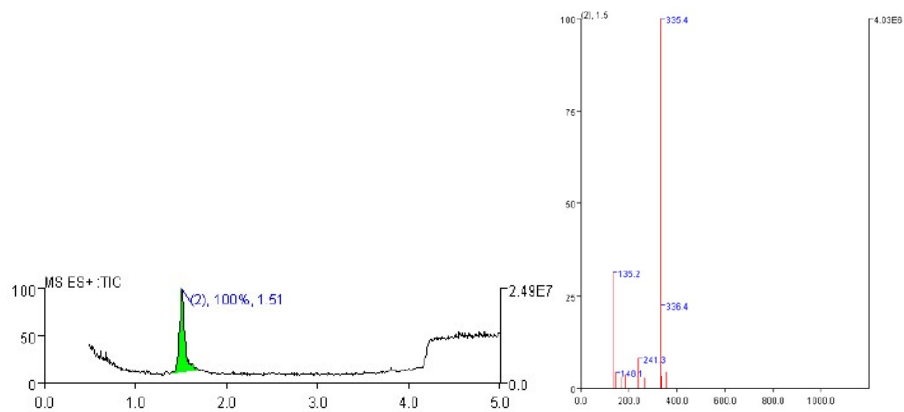

*tert*-butyl (1-(1-methyl-1H-pyrazol-5-yl)-1-(pyridin-2-ylamino)propan-2-yl)carbamate (**3o**)

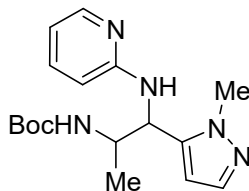

Prepared in parallel format according to Library Procedure A. Mix of diastereomers (2.5:1), 4.2 mg isolated;  $^1\text{H}$  NMR (400 MHz, DMSO- $d_6$ )  $\delta$  = 7.98 (d,  $J$  = 5.8 Hz, 1H), 7.74-7.71 (m, 1H), 7.32 (s, 1H), 7.09-6.73 (m, 2H), 6.25 (br s, 1H), 5.20 (t,  $J$  = 7.4 Hz, 1H), 4.00-3.90 (m, 2H), 3.84 (s, 3H), 1.29 (s, 9H), 1.05 (d,  $J$  = 6.2 Hz, 3H).  $^{13}\text{C}$  NMR (101 MHz, DMSO- $d_6$ )  $\delta$  = 158.11, 155.12, 144.70, 142.19, 138.16, 137.44, 112.62, 112.52, 104.46, 77.99, 77.89, 49.28, 48.76, 36.68, 28.07, 17.21, 17.00; HRMS (ESI)  $m/z$ :  $[\text{M} + \text{H}]^+$  calcd for  $\text{C}_{17}\text{H}_{25}\text{N}_5\text{O}_2$ , 332.2081; found, 332.2081.

*N*-((1-methyl-1H-pyrazol-5-yl)(1-methylcyclobutyl)methyl)pyridin-2-amine (**3p**)

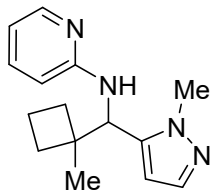

Prepared in parallel format according to Library Procedure A. 4.1 mg isolated;  $^1\text{H}$  NMR (400 MHz, DMSO- $d_6$ )  $\delta$  = 7.99 (d,  $J$  = 5.4 Hz, 1H), 7.83 (br s, 4H), 7.34 (s, 1H), 6.18 (br s, 1H), 5.21 (d,  $J$  = 8.6 Hz, 1H), 3.82 (s, 3H), 2.24-2.17 (m, 1H), 2.08-1.90 (m, 2H), 1.71-1.54 (3H), 1.22 (s, 3H); HRMS (ESI)  $m/z$ :  $[\text{M} + \text{H}]^+$  calcd for  $\text{C}_{15}\text{H}_{20}\text{N}_4$ , 257.1761; found, 257.1760.

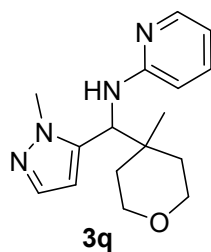

4.3 mg product obtained. LC-MS data – Ret. time 1.16: MS ES+  $m/z$  287 ( $[M+H]^+$ ).

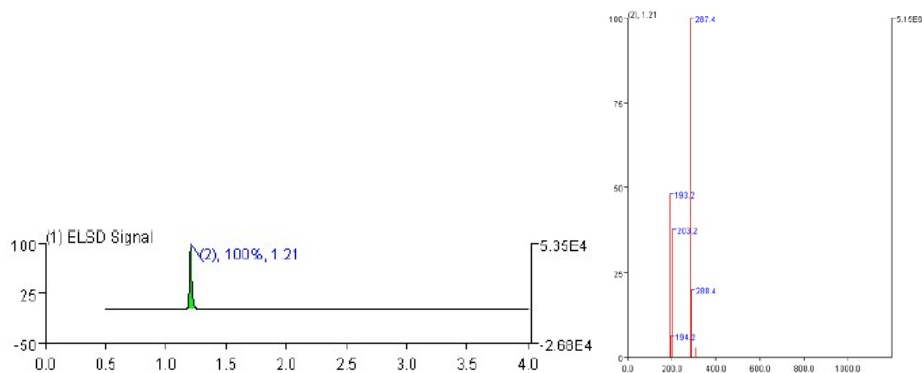

*methyl (1r,5r)-5-((1-methyl-1H-pyrazol-5-yl)(pyridin-2-ylamino)methyl)bicyclo[3.1.1]heptane-1-carboxylate (3r)*

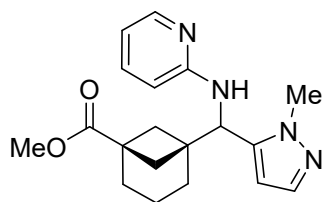

Prepared in parallel format according to Library Procedure A. 5 mg isolated;  $^1\text{H}$  NMR (400 MHz,  $\text{CDCl}_3$ )  $\delta$  = 7.85 (d,  $J$  = 6.2 Hz, 1H), 7.73 (t,  $J$  = 7.8 Hz, 1H), 7.46 (s, 1H), 6.79 (t,  $J$  = 6.6 Hz, 1H), 6.42-6.38 (m, 1H), 6.27 (s, 1H), 4.52 (s, 1H), 3.94 (s, 3H), 3.67 (s, 3H), 2.25 (d,  $J$  = 9.0 Hz, 1H), 2.04-1.81 (m, 9H).  $^{13}\text{C}$  NMR (101 MHz,  $\text{DMSO-d}_6$ )  $\delta$  = 175.58, 164.28, 164.00, 153.96, 143.65, 138.97, 112.37, 109.51, 106.01, 57.15, 51.79, 42.87, 42.29, 37.38, 36.65, 29.98, 29.89, 16.43; HRMS (ESI)  $m/z$ :  $[M + H]^+$  calcd for  $\text{C}_{19}\text{H}_{24}\text{N}_4\text{O}_2$ , 341.1972; found, 341.1972.

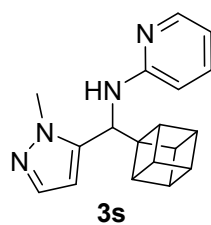

1.8 mg product obtained. LC-MS data – Ret. time 1.71: MS ES+  $m/z$  291 ( $[M+H]^+$ ).

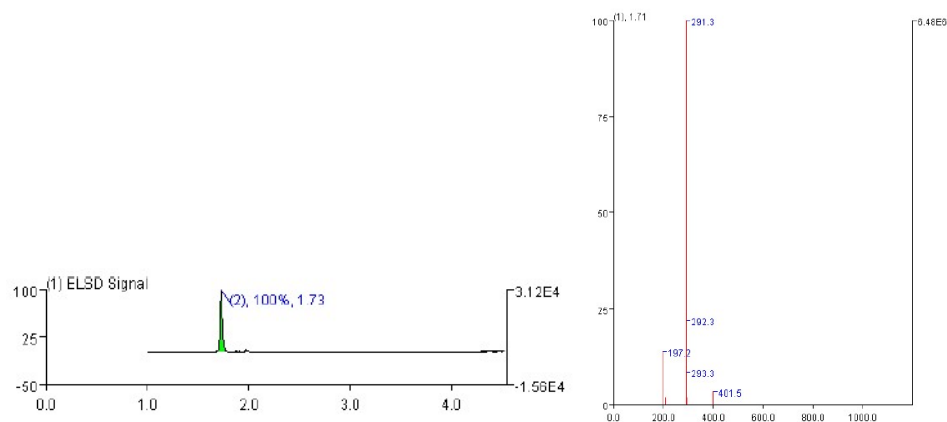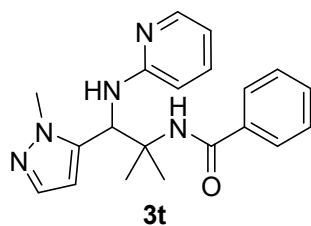

2.7 mg product obtained. LC-MS data – Ret. time 1.69: MS ES+  $m/z$  350 ( $[M+H]^+$ ).

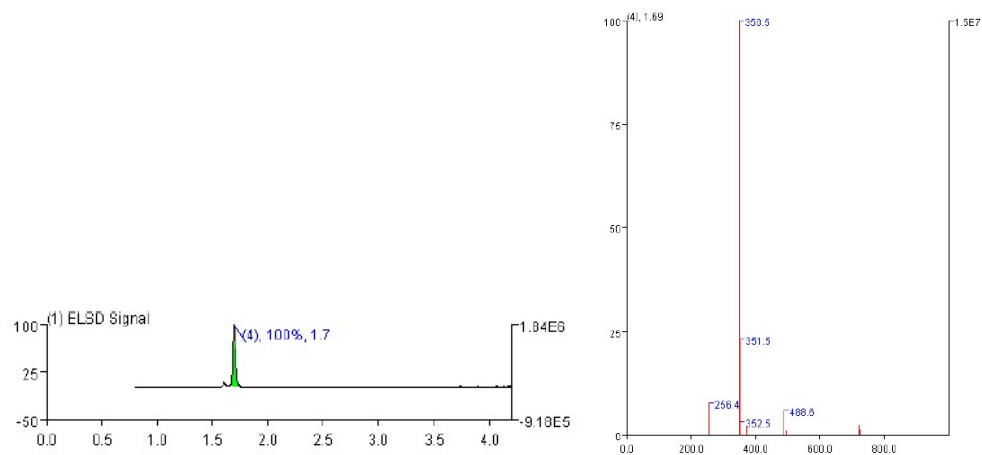

*N*-(1-(1-cyclopropyl-1H-1,2,3-triazol-4-yl)-2,2-dimethylpropyl)pyridin-3-amine (**3u**)

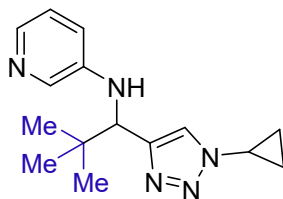

Prepared according to general procedure B (0.17 mmol scale). Purification via flash column chromatography (linear gradient: 1% MeOH / CH<sub>2</sub>Cl<sub>2</sub> to 9% MeOH / CH<sub>2</sub>Cl<sub>2</sub>) provided 25 mg (54% yield); <sup>1</sup>H NMR (400 MHz, CDCl<sub>3</sub>) δ = 8.16 (br s, 1H), 7.87 (d, *J* = 3.9 Hz, 1H), 7.45 (s, 1H), 7.05-7.02 (m, 1H), 6.91-6.89 (m, 1H), 4.66 (d, *J* = 7.4 Hz, 1H), 4.32 (d, *J* = 7.8 Hz, 1H), 3.73-3.68 (m, 1H), 1.24-1.20 (m, 2H), 1.14-1.10 (m, 2H), 1.04 (s, 9H). <sup>13</sup>C NMR (101 MHz, DMSO-*d*<sub>6</sub>) δ = 147.02, 144.27, 137.44, 135.88, 124.02, 122.49, 120.07, 59.59, 35.04, 31.32, 26.62, 6.87; HRMS (ESI) *m/z*: [M + H]<sup>+</sup> calcd for C<sub>15</sub>H<sub>21</sub>N<sub>5</sub>, 272.1864; found, 272.1871.

*N*-((1-cyclopropyl-1H-1,2,3-triazol-4-yl)(1-methylcyclopropyl)methyl)pyridin-3-amine (**3v**).

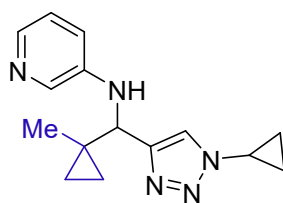

Prepared according to general procedure B (0.25 mmol scale). Purification via flash column chromatography (linear gradient: 0% MeOH / CH<sub>2</sub>Cl<sub>2</sub> to 7% MeOH / CH<sub>2</sub>Cl<sub>2</sub>) provided 15 mg (22% yield); <sup>1</sup>H NMR (400 MHz, DMSO-*d*<sub>6</sub>) δ = 8.04-7.98 (m, 3H), 7.62-7.57 (m, 2H), 7.28 (br s, 1H), 4.34 (br s, 1H), 3.96-3.92 (m, 1H), 1.15-1.06 (m, 7H), 0.63-0.60 (m, 1H), 0.55-0.51 (m, 1H), 0.42-0.38 (m, 1H), 0.34-0.30 (m, 1H); <sup>13</sup>C NMR (101 MHz, DMSO-*d*<sub>6</sub>) δ = 146.60, 145.89, 129.04, 126.61, 126.10, 122.65, 55.53, 31.19, 19.58, 19.31, 11.72, 10.82, 6.63; HRMS (ESI) *m/z*: [M + H]<sup>+</sup> calcd for C<sub>15</sub>H<sub>19</sub>N<sub>5</sub>, 270.1713; found, 270.1713.

*tert*-butyl 4-((1-cyclopropyl-1*H*-1,2,3-triazol-4-yl)(pyridin-3-ylamino)methyl)-4-methylpiperidine-1-carboxylate (**3w**)

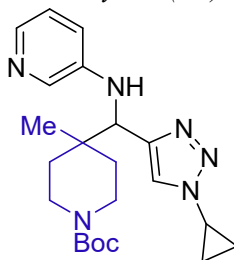

Prepared according to general procedure B (0.25 mmol scale). Purification via flash column chromatography (linear gradient: 2% MeOH / CH<sub>2</sub>Cl<sub>2</sub> to 7% MeOH / CH<sub>2</sub>Cl<sub>2</sub>) provided 48 mg (47% yield); <sup>1</sup>H NMR (400 MHz, CDCl<sub>3</sub>) δ = 8.26 (br s, 1H), 7.92 (d, *J* = 4.3 Hz, 1H), 7.51 (s, 1H), 7.11 (dd, *J* = 8.2, 4.7 Hz, 1H), 6.98 (dd, *J* = 8.0, 1.6 Hz, 1H), 4.87 (br s, 1H), 4.43 (d, *J* = 8.6 Hz, 1H), 3.92-3.84 (m, 2H), 3.76-3.71 (m, 1H), 3.09-3.02 (m, 2H), 1.65-1.62 (m, 3H), 1.48 (s, 9H), 1.29-1.24 (m, 3H), 1.17-1.14 (m, 5H). <sup>13</sup>C NMR (101 MHz, DMSO-*d*<sub>6</sub>) δ = 154.88, 145.93, 144.13, 135.90, 124.05, 122.70 (2 peaks), 79.49, 59.19, 36.49, 31.86, 31.39, 28.43, 22.67, 18.09, 6.88; HRMS (ESI) *m/z*: [M + H]<sup>+</sup> calcd for C<sub>22</sub>H<sub>32</sub>N<sub>6</sub>O<sub>2</sub>, 413.2660; found, 413.2651.

*tert*-butyl (2-((1-cyclopropyl-1*H*-1,2,3-triazol-4-yl)(pyridin-3-ylamino)methyl)cyclohexyl)carbamate (**3x**)

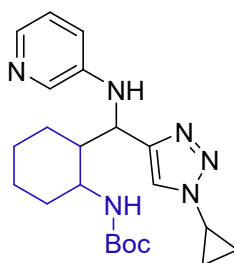

Prepared according to general procedure B (0.50 mmol scale). Purification via flash column chromatography (linear gradient: 0% MeOH / CH<sub>2</sub>Cl<sub>2</sub> to 5% MeOH / CH<sub>2</sub>Cl<sub>2</sub>) provided 57 mg (28% yield) as a mixture of diastereomers; <sup>1</sup>H NMR (400 MHz, DMSO-*d*<sub>6</sub>) δ = 8.06 (d, *J* = 2.0 Hz, 1H), 7.81 (s, 1H), 7.81-7.80 (m, 1H), 7.20-7.17 (m, 2H), 7.04 (d, *J* = 7.2, 1H), 6.45 (d, *J* = 5.3 Hz, 1H), 4.81-4.79 (m, 1H), 3.96-3.92 (m, 1H), 2.92-2.89 (m, 1H), 1.93-1.87 (m, 2H), 1.71-1.68 (m, 1H), 1.59 (br s, 2H), 1.41 (s, 9H), 1.27-1.01 (m, 7H). <sup>13</sup>C NMR (101 MHz, DMSO-*d*<sub>6</sub>) δ = 155.21, 144.60, 144.54, 134.53, 127.66, 124.43, 122.95, 122.86, 77.63, 50.43, 49.30, 44.73, 33.26, 30.96, 28.26, 28.06, 25.61, 24.74, 6.53. HRMS (ESI) *m/z*: [M + H]<sup>+</sup> calcd for C<sub>22</sub>H<sub>32</sub>N<sub>6</sub>O<sub>2</sub>, 413.2660; found, 413.2641.

*tert*-butyl (2-(pyridin-3-yl(pyridin-3-ylamino)methyl)cyclohexyl)carbamate (**3y**)

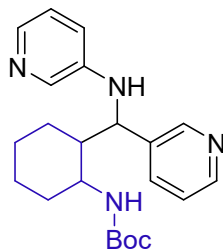

Prepared according to general procedure B (0.50 mmol scale). Purification via flash column chromatography (linear gradient: 1% MeOH / CH<sub>2</sub>Cl<sub>2</sub> to 6% MeOH / CH<sub>2</sub>Cl<sub>2</sub>) provided 84 mg (44% yield) as a mixture of diastereomers; <sup>1</sup>H NMR (400 MHz, DMSO-d<sub>6</sub>) (major diastereomer) δ = 8.58-8.54 (m, 2H), 8.03-8.00 (m, 2H), 7.62-7.60 (m, 1H), 7.51-7.47 (m, 2H), 7.06 (d, *J* = 7.2 Hz, 1H), 4.95 (t, *J* = 5.5 Hz, 1H), 4.77 (br s, 1H), 3.05-2.99 (m, 1H), 1.99-1.90 (m, 2H), 1.77-1.76 (m, 1H), 1.63-1.56 (m, 1H), 1.41 (s, 9H), 1.23-1.10 (m, 3H), 1.03-0.99 (m, 1H), 0.60-0.55 (m, 1H). <sup>13</sup>C NMR (101 MHz, DMSO-d<sub>6</sub>) δ = 158.84, 158.57, 155.67, 146.32, 129.81, 127.38, 127.08, 124.54, 118.19, 115.83, 78.37, 55.12, 54.13, 50.51, 46.44, 33.77, 28.74, 26.39, 24.95, 24.87; HRMS (ESI) *m/z*: [M + H]<sup>+</sup> calcd for C<sub>22</sub>H<sub>30</sub>N<sub>4</sub>O<sub>2</sub>, 383.2442; found, 383.2427.

## Characterization Data: Aryl Bromide Diversity Set

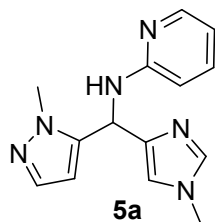

8.4 mg product obtained. LC-MS data – Ret. time 0.86: MS ES+  $m/z$  269 ( $[M+H]^+$ ).

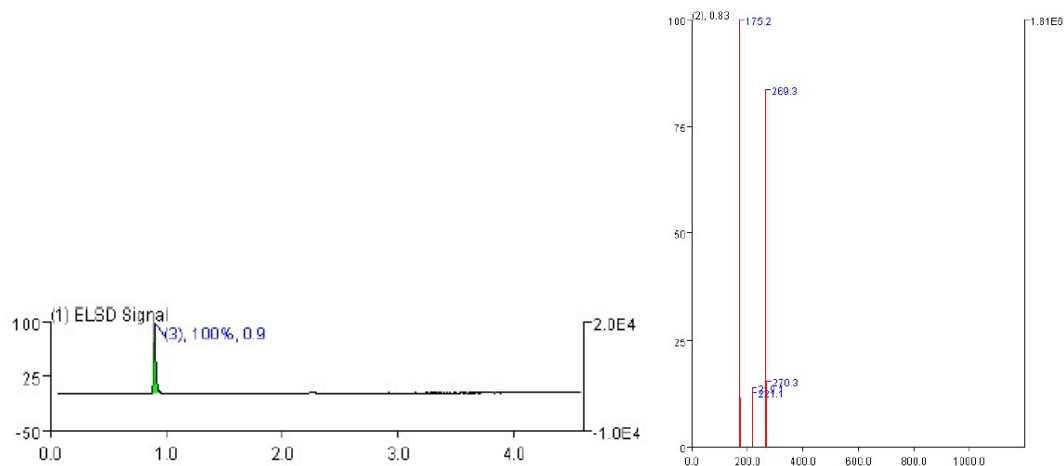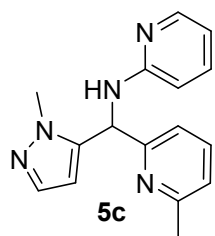

17 mg product obtained. LC-MS data – Ret. time 1.16: MS ES+  $m/z$  280 ( $[M+H]^+$ ).

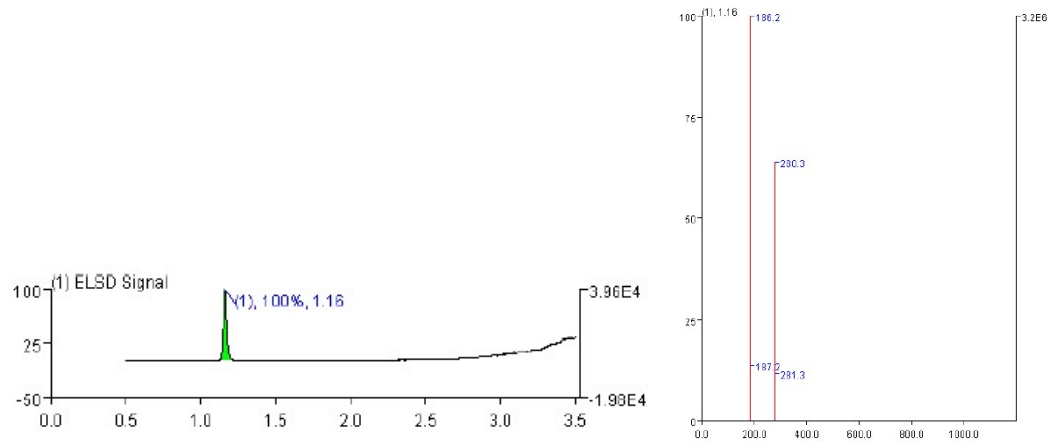

*N-((1-methyl-1H-pyrazol-5-yl)(pyridin-2-yl)methyl)pyridin-2-amine (5d)*

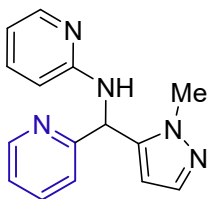

55 mg isolated according to General Library Procedure C.  $^1\text{H}$  NMR (400 MHz,  $\text{CHLOROFORM-}d$ )  $\delta$  ppm 8.56 - 8.55 (d,  $J=4.3$  Hz, 1 H), 8.04 - 8.03 (d,  $J=4.7$  Hz, 1 H), 7.64 - 7.60 (t,  $J=7.4$ , 7.4 Hz, 1 H), 7.36 - 7.30 (m, 3 H), 7.20 - 7.17 (t,  $J=6.2$ , 5.1 Hz, 1 H), 6.58 - 6.55 (t,  $J=5.5$ , 5.5 Hz, 1 H), 6.47 - 6.45 (d,  $J=7.8$  Hz, 1 H), 6.36 - 6.34 (d,  $J=7.0$  Hz, 1 H), 6.10 - 6.09 (d,  $J=7.4$  Hz, 1 H), 5.96 (s, 1 H), 3.90 (s, 3 H);  $^{13}\text{C}$  NMR (101 MHz,  $\text{CHLOROFORM-}d$ )  $\delta$  ppm 158.22, 156.77, 148.74, 147.53, 142.51, 137.60, 136.95, 136.50, 122.27, 121.58, 113.38, 107.98, 105.24, 52.02, 36.68; HRMS (ESI)  $m/z$ :  $[\text{M} + \text{H}]^+$  calculated for  $\text{C}_{15}\text{H}_{15}\text{N}_5$ , 266.1400; found, 266.1402.

*N-((1-methyl-1H-pyrazol-5-yl)(pyridin-3-yl)methyl)pyridin-2-amine (5e)*

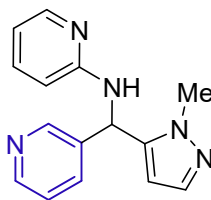

35 mg isolated according to General Library Procedure C.  $^1\text{H}$  NMR (400 MHz,  $\text{CHLOROFORM-}d$ )  $\delta$  ppm 8.67 (d,  $J=2$  Hz, 1 H), 8.57 - 8.56 (d,  $J=3.9$  Hz, 1 H), 8.09 - 8.07 (d,  $J=4.3$  Hz, 1 H), 7.69 - 7.67 (d,  $J=7.8$  Hz, 1 H), 7.46 - 7.40 (m, 2 H), 7.31 - 7.29 (t,  $J=4.7$ , 3.1 Hz, 1 H), 6.67 - 6.64 (t,  $J=5$ , 2 Hz, 1 H), 6.45 - 6.39 (dd,  $J=8.2$ , 10.5 Hz, 2 H), 5.94 (d,  $J=2$  Hz, 1 H), 5.09-5.07 (d,  $J=6.6$  Hz, 1 H), 3.85 (s, 3 H);  $^{13}\text{C}$  NMR (101 MHz,  $\text{CHLOROFORM-}d$ )  $\delta$  ppm 156.40, 149.23, 149.02, 147.84, 142.57, 138.28, 137.84, 135.71, 134.76, 123.54, 114.32, 108.17, 106.03, 49.38, 36.94; HRMS (ESI)  $m/z$ :  $[\text{M} + \text{H}]^+$  calculated for  $\text{C}_{15}\text{H}_{15}\text{N}_5$ , 266.1400; found, 266.1405.

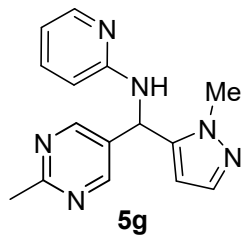

9.3 mg product obtained. LC-MS data – Ret. time 0.91: MS ES+  $m/z$  281 ( $[M+H]^+$ ).

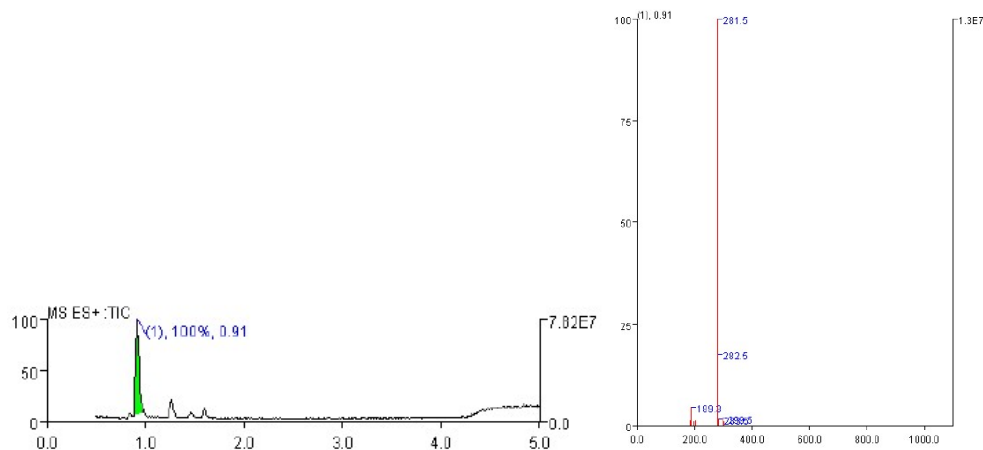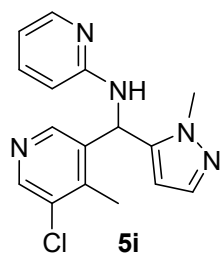

Protocol executed on smaller scale (0.2 mmol imine). 2.5 mg product obtained. LC-MS data – Ret. time 1.86: MS ES+  $m/z$  314 ( $[M+H]^+$ ).

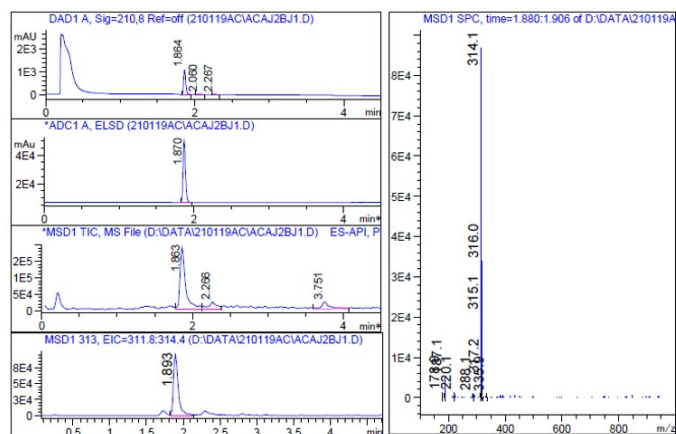

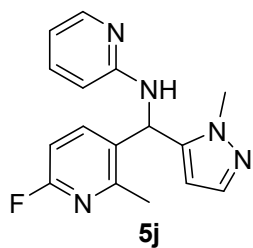

Protocol executed on smaller scale (0.2 mmol imine). 3.4 mg product obtained. LC-MS data – Ret. time 2.35: MS ES+  $m/z$  298 ( $[M+H]^+$ ).

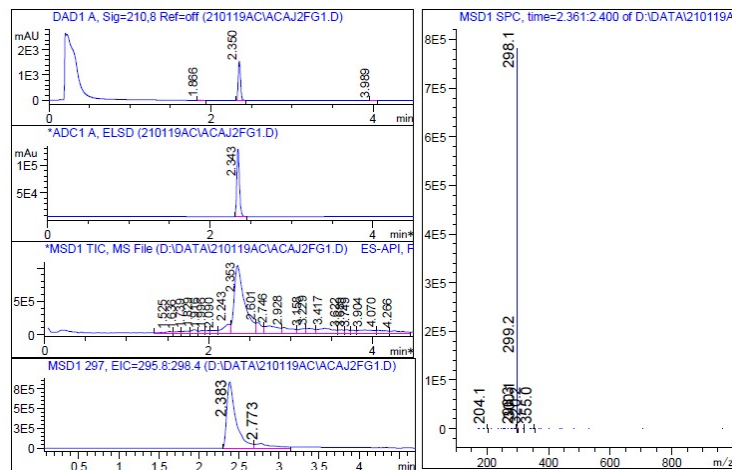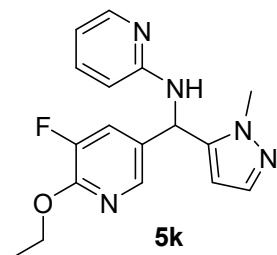

Protocol executed on smaller scale (0.2 mmol imine). 1.1 mg product obtained. LC-MS data – Ret. time 2.2: MS ES+  $m/z$  328 ( $[M+H]^+$ ).

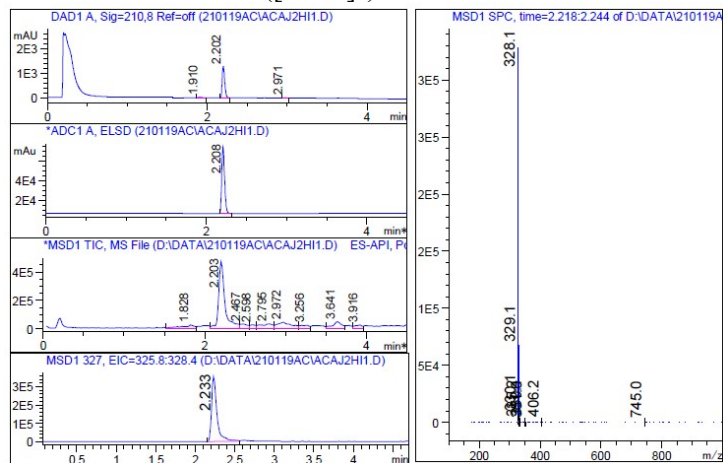

*N-((4,6-dimethylpyrimidin-5-yl)(1-methyl-1H-pyrazol-5-yl)methyl)pyridin-2-amine (5l)*

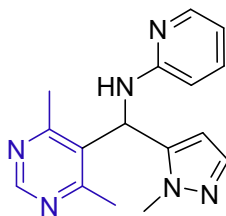

47 mg isolated according to General Library Procedure C.  $^1\text{H}$  NMR (400 MHz,  $\text{CHLOROFORM-}d$ )  $\delta$  ppm 8.87 (s, 1 H), 8.06-8.05 (d,  $J=4.29$  Hz, 1 H), 7.45-7.38 (m, 2 H), 6.78-6.76 (d,  $J=7.80$  Hz, 1 H), 6.66-6.63 (t,  $J=5.85$  Hz, 1 H), 6.43-6.41 (d,  $J=7.80$  Hz, 1 H), 5.85-5.84 (d,  $J=1.56$  Hz, 1 H), 5.02-5.01 (d,  $J=5.85$  Hz, 1 H), 3.85 (s, 3 H), 2.65 (s, 6 H);  $^{13}\text{C}$  NMR (101 MHz,  $\text{CHLOROFORM-}d$ )  $\delta$  ppm 164.98, 156.60, 155.97, 148.06, 139.88, 138.29, 137.78, 130.18, 114.33, 107.89, 106.68, 46.43, 37.13, 23.49; HRMS (ESI)  $m/z$ :  $[\text{M} + \text{H}]^+$  calculated for  $\text{C}_{16}\text{H}_{18}\text{N}_6$ , 295.1666; found, 295.1676.

*N-((4-(benzyloxy)-5-ethyl-2-methoxyphenyl)(1-methyl-1H-pyrazol-5-yl)methyl)pyridin-2-amine (5m)*

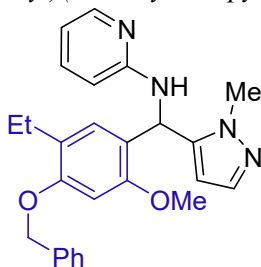

26 mg isolated according to General Library Procedure C.  $^1\text{H}$  NMR (400 MHz,  $\text{CHLOROFORM-}d$ )  $\delta$  ppm 8.09-8.08 (d,  $J=3.90$  Hz, 1 H), 7.46-7.32 (m,  $J=53.90$  Hz, 7 H), 7.02 (s, 1 H), 6.61-6.58 (t,  $J=5.85$  Hz, 1 H), 6.53 (s, 1 H), 6.37-6.35 (d,  $J=8.20$  Hz, 1 H), 6.29-6.27 (d,  $J=7.41$  Hz, 1 H), 6.04 (d,  $J=1.56$  Hz, 1 H), 5.10 (s, 2 H), 3.79 (d,  $J=3.12$  Hz, 6 H), 2.61-2.56 (q,  $J=7.41$  Hz, 2 H), 1.15-1.11 (t,  $J=7.41$  Hz, 3 H);  $^{13}\text{C}$  NMR (126 MHz,  $\text{CHLOROFORM-}d$ )  $\delta$  ppm 157.01, 156.69, 155.43, 143.64, 137.69, 137.56, 136.90, 128.32, 128.11, 127.62, 126.83, 125.13, 119.22, 113.19, 107.08, 105.04, 96.55, 69.98, 55.59, 46.71, 36.50, 22.52, 14.24; HRMS (ESI)  $m/z$ :  $[\text{M} + \text{H}]^+$  calculated for  $\text{C}_{26}\text{H}_{28}\text{N}_4\text{O}_2$ , 429.2285; found, 429.2290.

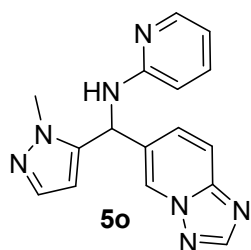

4.2 mg product obtained. LC-MS data – Ret. time 1.03: MS ES+  $m/z$  306 ( $[M+H]^+$ ).

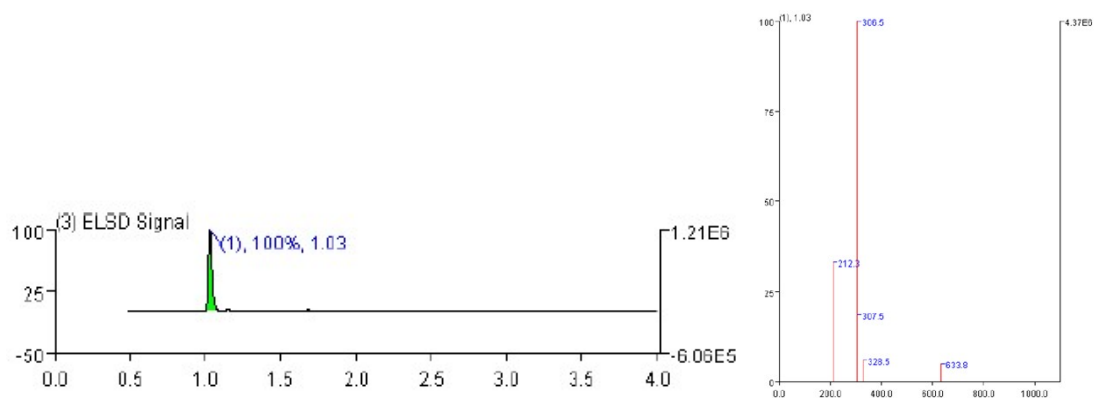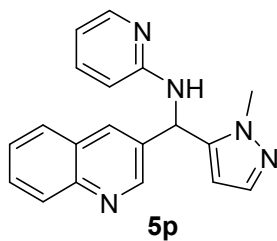

Protocol executed on smaller scale (0.2 mmol imine). 1.4 mg product obtained. LC-MS data – Ret. time 1.9: MS ES+  $m/z$  316 ( $[M+H]^+$ ).

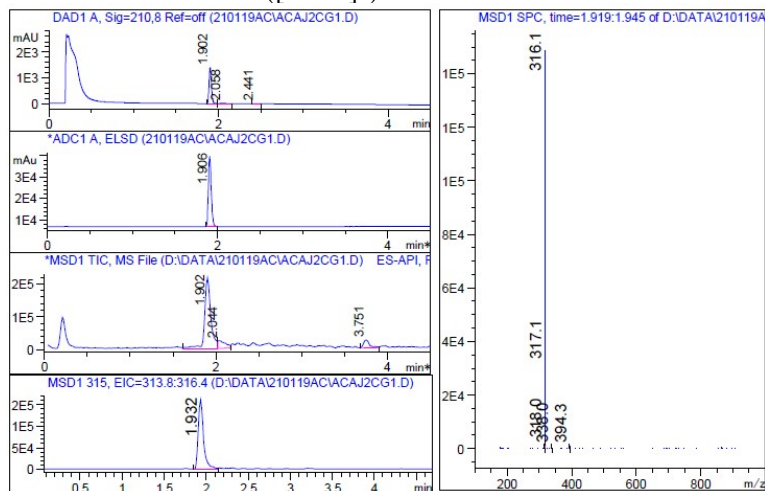

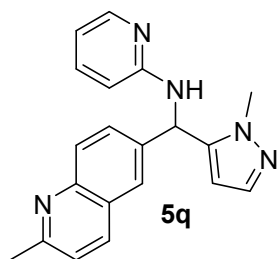

Protocol executed on smaller scale (0.2 mmol imine). 1.1 mg product obtained. LC-MS data – Ret. time 2.0: MS ES+  $m/z$  330 ( $[M+H]^+$ ).

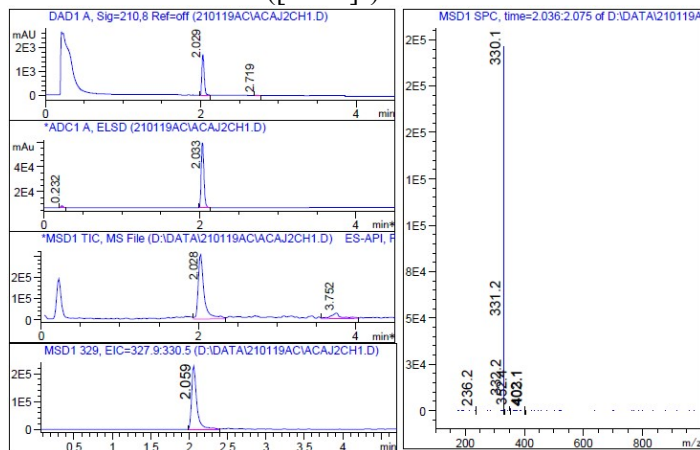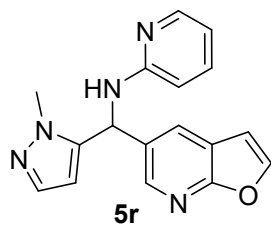

31 mg product obtained. LC-MS data – Ret. time 0.94: MS ES+  $m/z$  306 ( $[M+H]^+$ ).

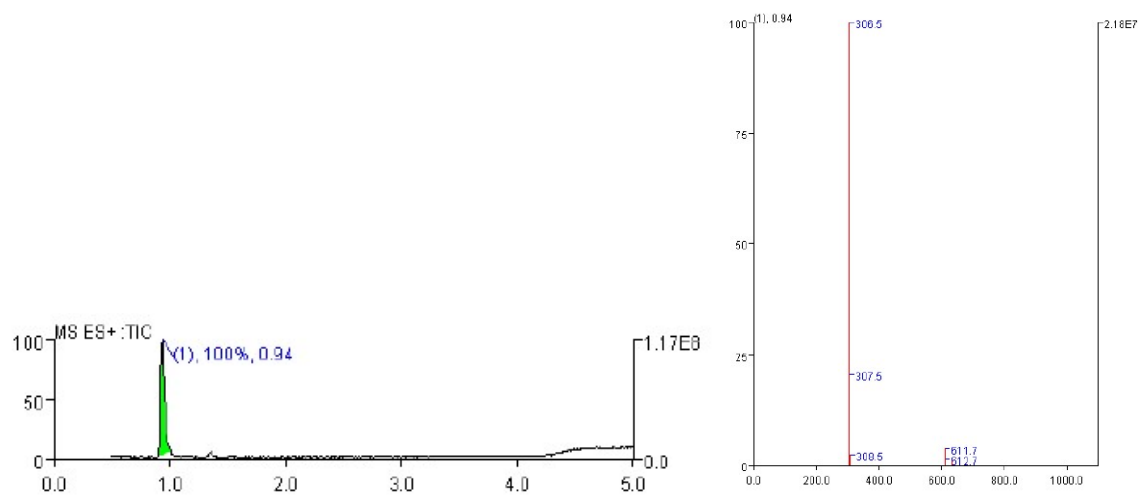

*N-((1-methyl-1H-imidazol-2-yl)(1-methyl-1H-pyrazol-5-yl)methyl)pyridin-2-amine (5s)*

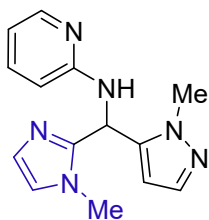

50 mg isolated according to General Library Procedure C.  $^1\text{H}$  NMR (400 MHz,  $\text{CHLOROFORM-}d$ )  $\delta$  ppm 8.08 - 8.07 (d,  $J=4.68$  Hz, 1 H), 7.43 - 7.37 (dd,  $J=19.9$  Hz, 1 H), 7.39-7.37 (dd,  $J=16.78$ , 1 H), 7.02 (s, 1 H), 6.85 (s, 1 H), 6.71 - 6.69 (d,  $J=8.2$  Hz, 1 H), 6.64 - 6.61 (t,  $J=5.9$ , 5.9 Hz, 1 H), 6.59 - 6.57 (d,  $J=8.6$  Hz, 1 H), 6.02 (d,  $J=2$  Hz, 1 H), 5.88 - 5.87 (d,  $J=7.81$  Hz, 1 H), 3.94 (s, 3 H), 3.61 (s, 3 H);  $^{13}\text{C}$  NMR (101 MHz,  $\text{CHLOROFORM-}d$ )  $\delta$  ppm 156.75, 147.42, 146.51, 140.45, 138.44, 137.89, 126.70, 121.85, 114.49, 110.17, 106.48, 43.87, 37.37, 33.93; HRMS (ESI)  $m/z$ :  $[\text{M} + \text{H}]^+$  calculated for  $\text{C}_{14}\text{H}_{16}\text{N}_6$ , 269.1509; found, 269.1519.

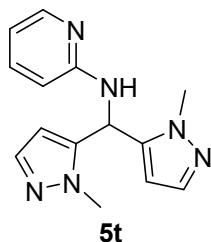

Protocol executed on smaller scale (0.2 mmol imine). 1.4 mg product obtained. LC-MS data – Ret. time 2.1: MS ES+  $m/z$  269 ( $[\text{M}+\text{H}]^+$ ).

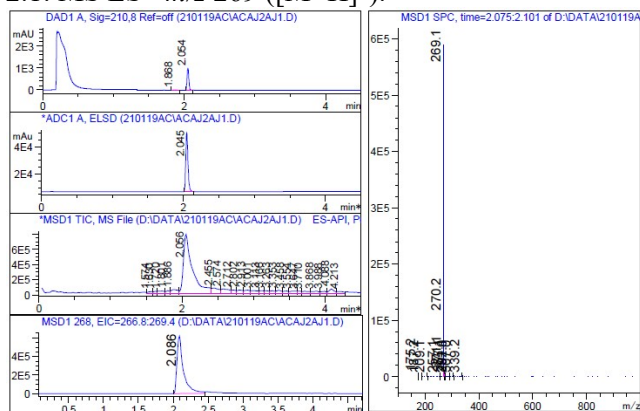

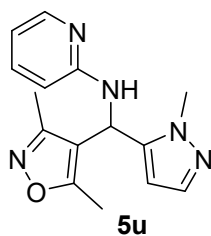

Protocol executed on smaller scale (0.2 mmol imine). 2.1 mg product obtained. LC-MS data – Ret. time 2.3: MS ES+  $m/z$  284 ( $[M+H]^+$ ).

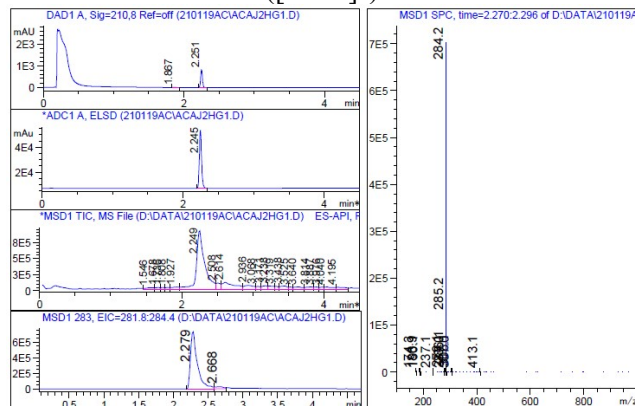

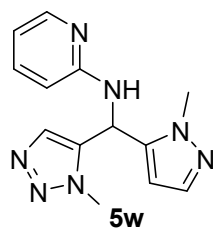

Protocol executed on smaller scale (0.2 mmol imine). 1.1 mg product obtained. LC-MS data – Ret. time 1.9: MS ES+  $m/z$  270 ( $[M+H]^+$ ).

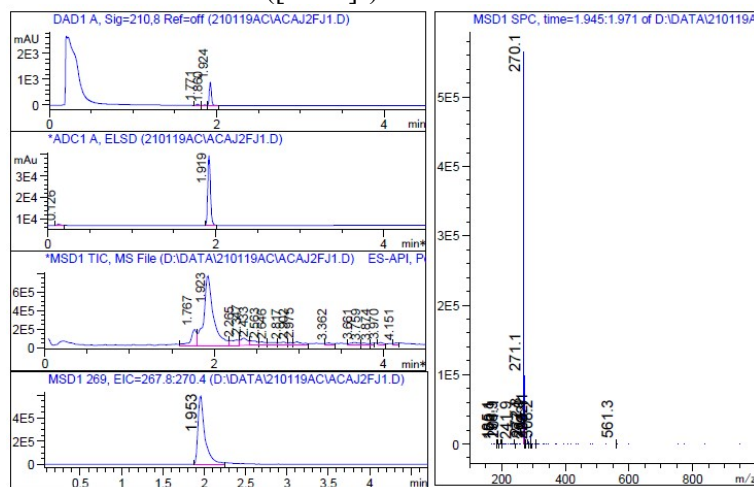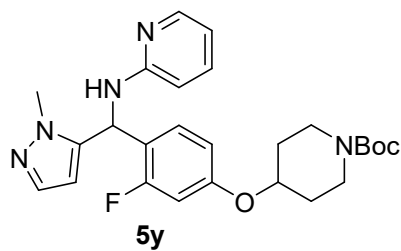

82 mg product obtained. LC-MS data – Ret. time 2.3: MS ES+  $m/z$  482 ( $[M+H]^+$ ).

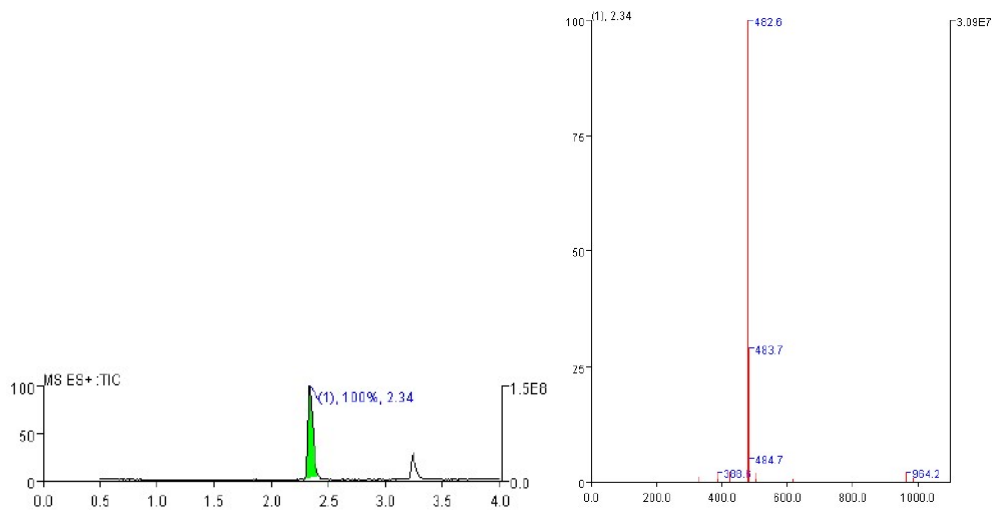

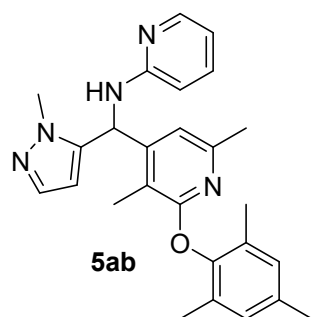

53 mg product obtained. LC-MS data – Ret. time 2.6: MS ES+  $m/z$  428 ( $[M+H]^+$ ).

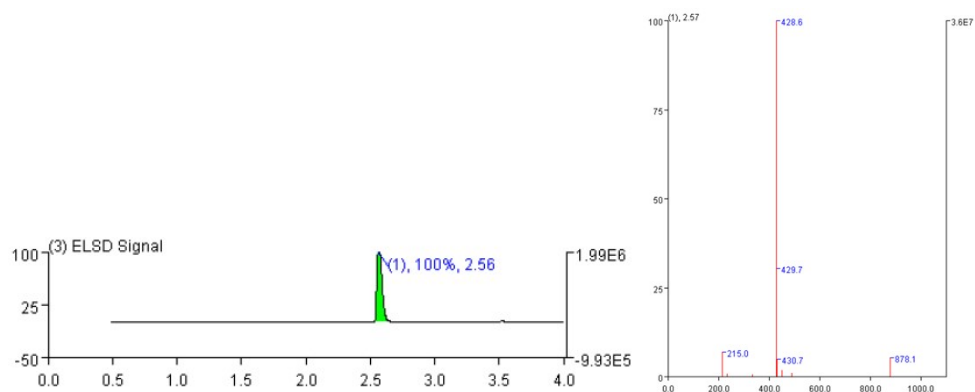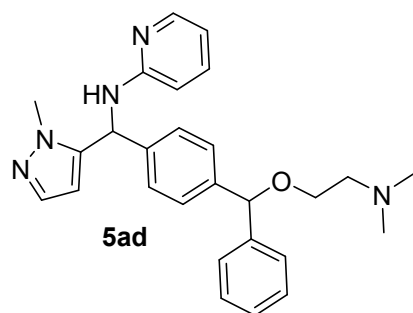

2.2 mg product obtained. LC-MS data – Ret. time 1.3: MS ES+  $m/z$  443 ( $[M+H]^+$ ).

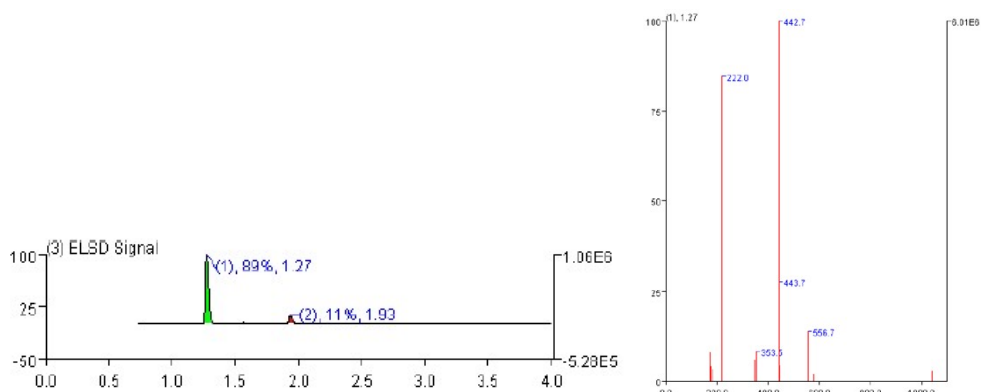

## Characterization Data: Amine Diversity Set

**7a** - 7.5 mg product obtained. LC-MS data – Ret. time 1.37: MS ES+  $m/z$  292.4 ( $[M+H]^+$ ).

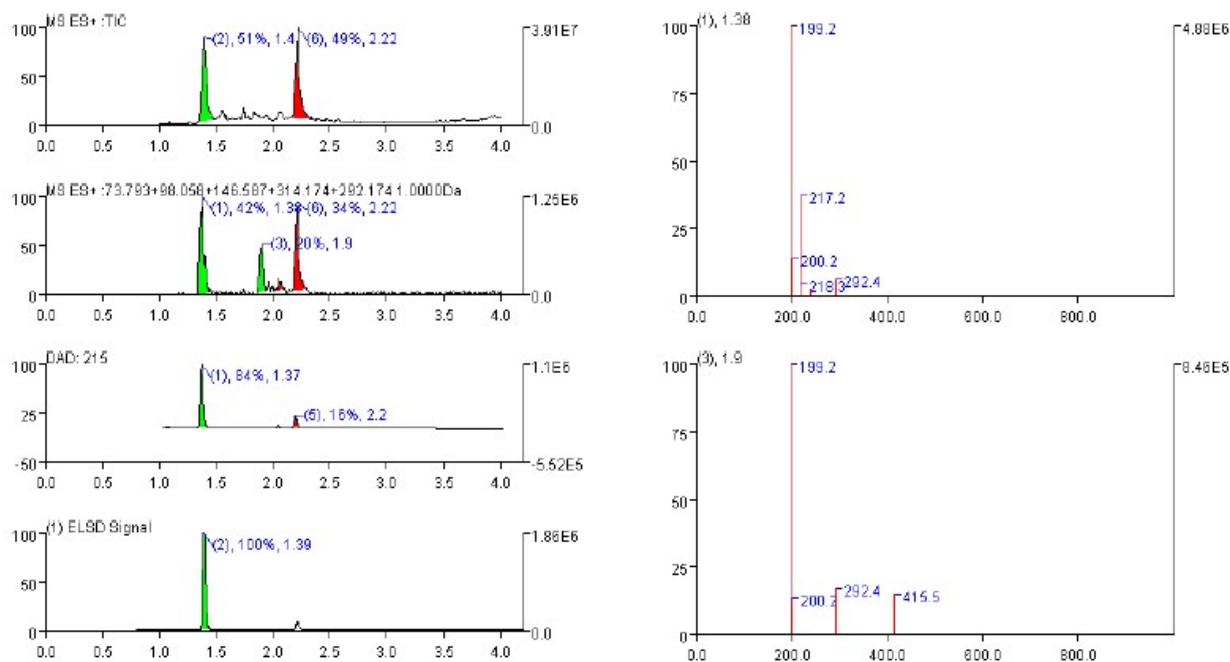

**7b** - 39.7 mg product obtained. LC-MS data – Ret. time 1.24: MS ES+  $m/z$  293.4 ( $[M+H]^+$ ).

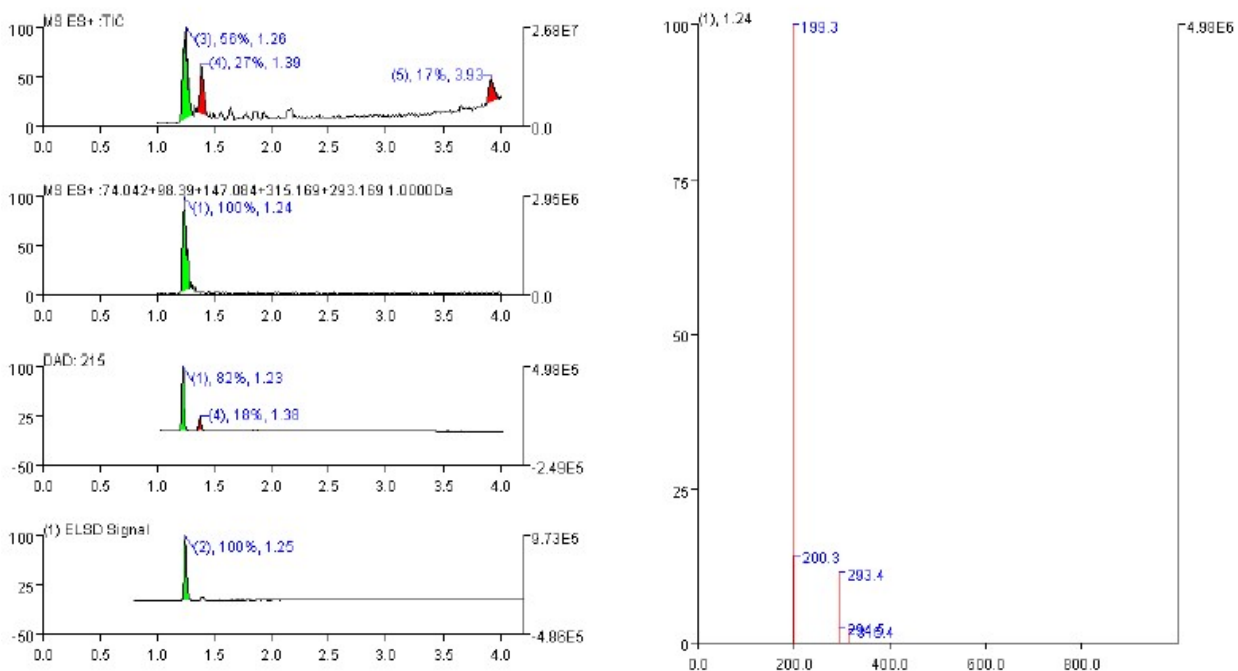

**7c** - 9.6 mg product obtained. LC-MS data – Ret. time 1.23: MS ES+  $m/z$  293.4 ( $[M+H]^+$ ).

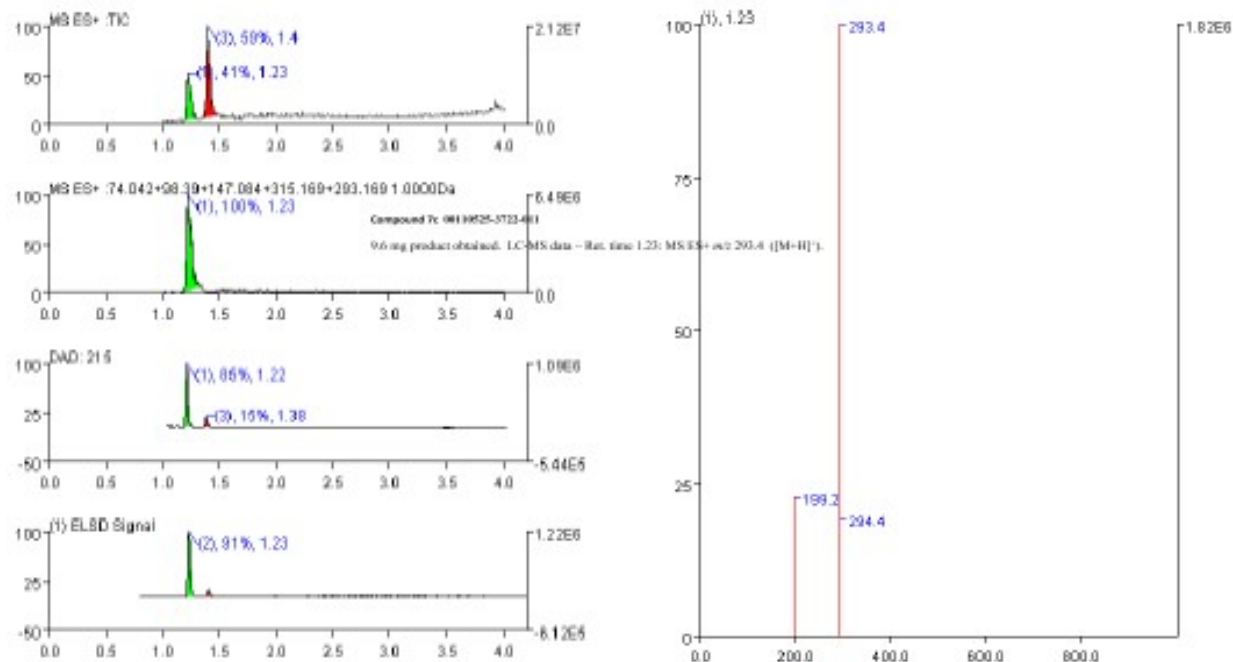

**7d** - 5.1 mg product obtained. LC-MS data – Ret. time 1.22: MS ES+  $m/z$  293.4 ( $[M+H]^+$ ).

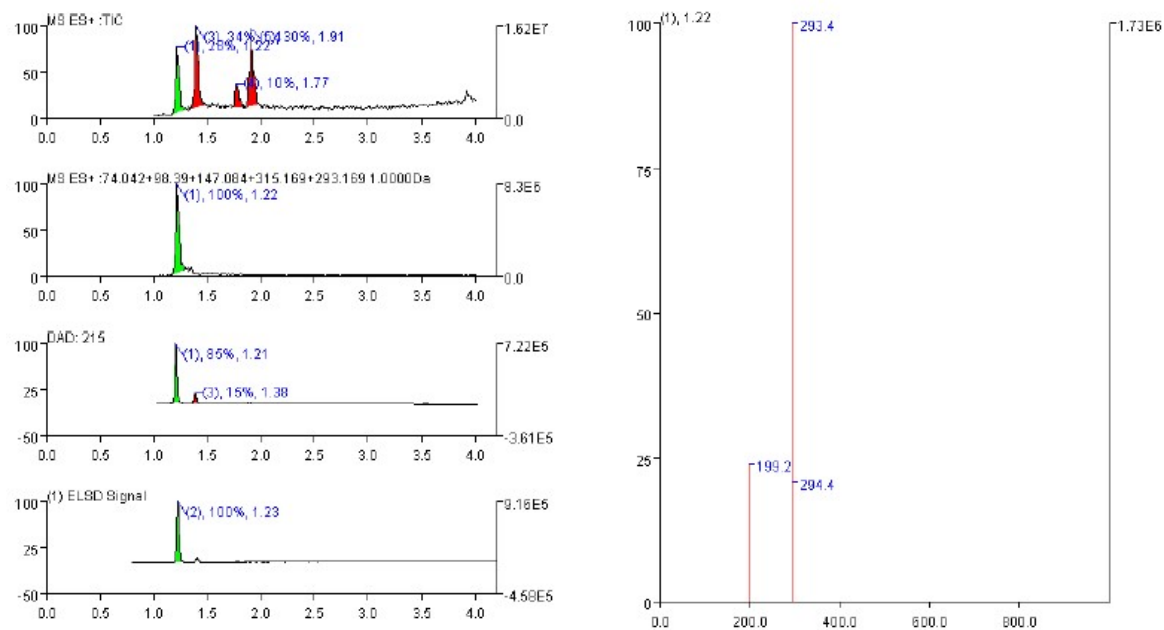

**7e** - 1.5 mg product obtained. LC-MS data – Ret. time 1.22: MS ES+  $m/z$  294.5 ( $[M+H]^+$ ).

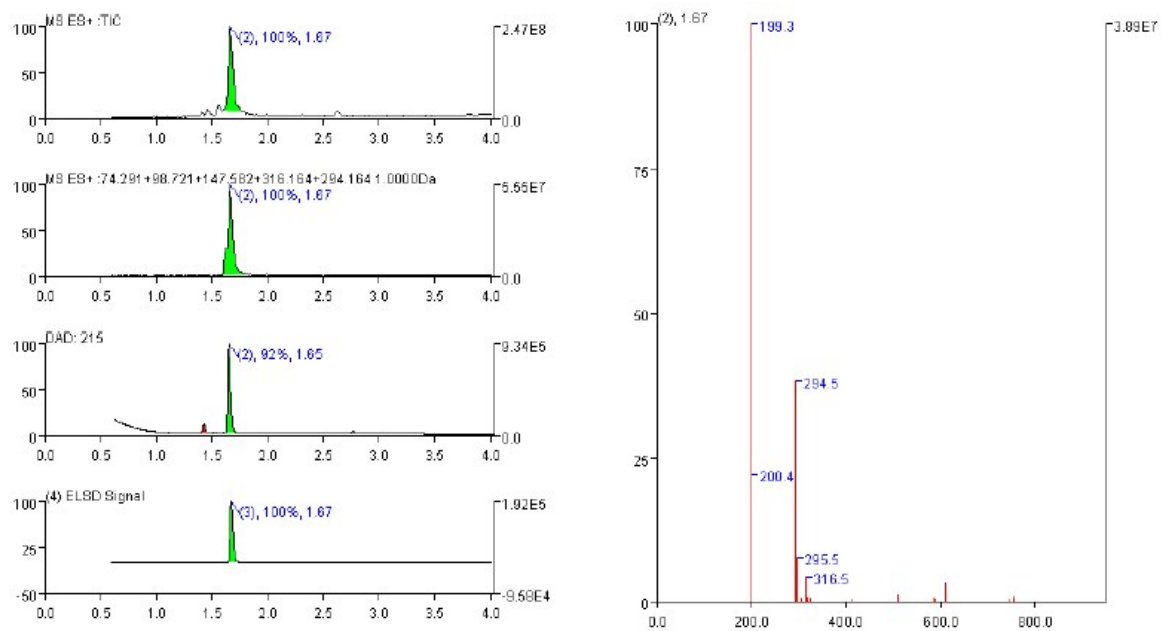

**7f** - 17.2 mg product obtained. LC-MS data – Ret. time 1.67: MS ES+  $m/z$  307.4 ( $[M+H]^+$ ).

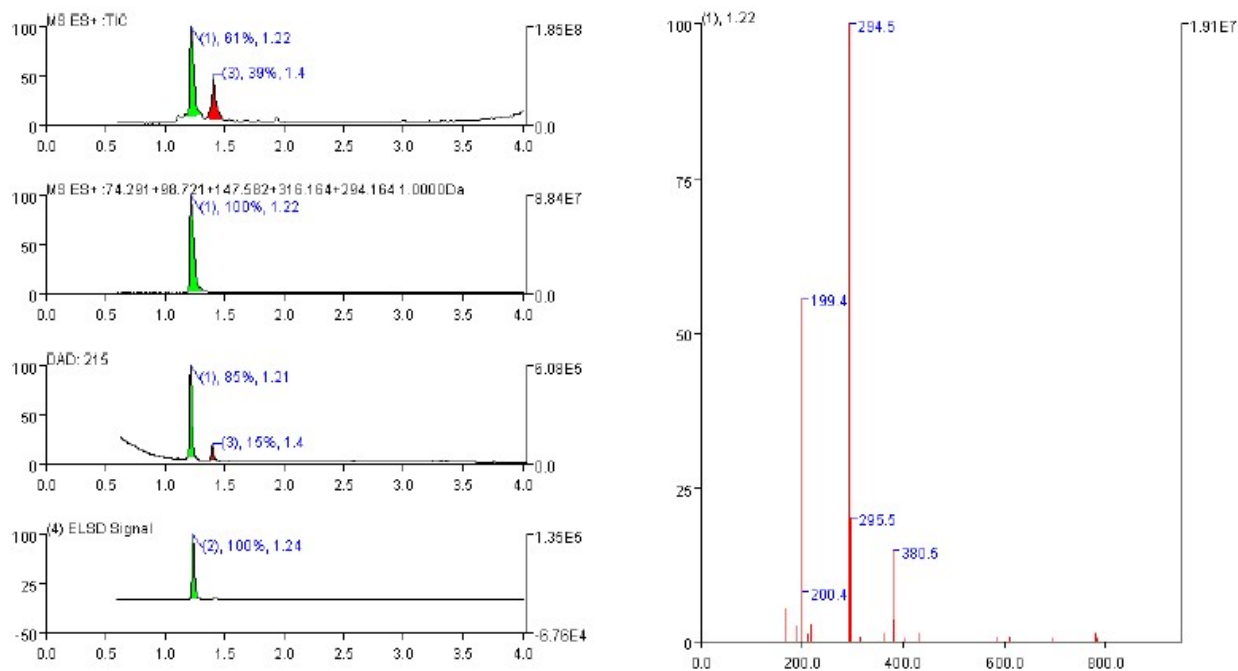

**7g** - 5.0 mg product obtained. LC-MS data – Ret. time 0.99: MS ES+  $m/z$  294.4 ( $[M+H]^+$ ).

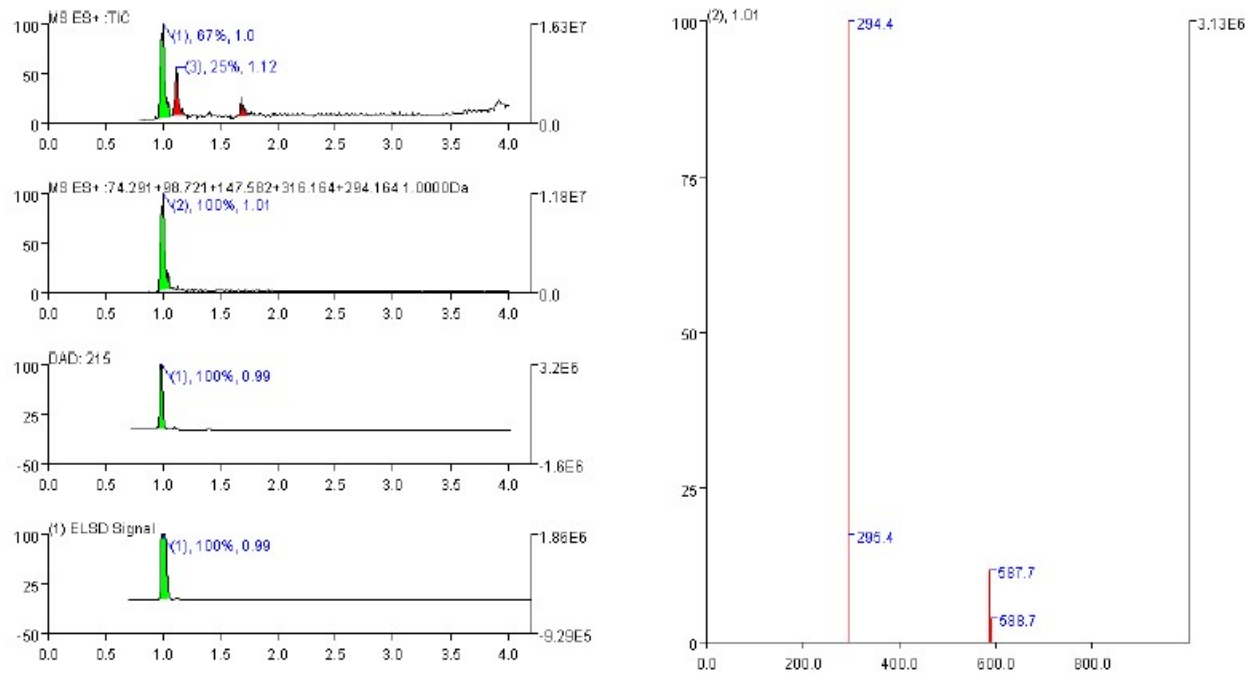

**7h** - 33.1 mg product obtained. LC-MS data – Ret. time 1.81: MS ES+  $m/z$  369.4 ( $[M+H]^+$ ).

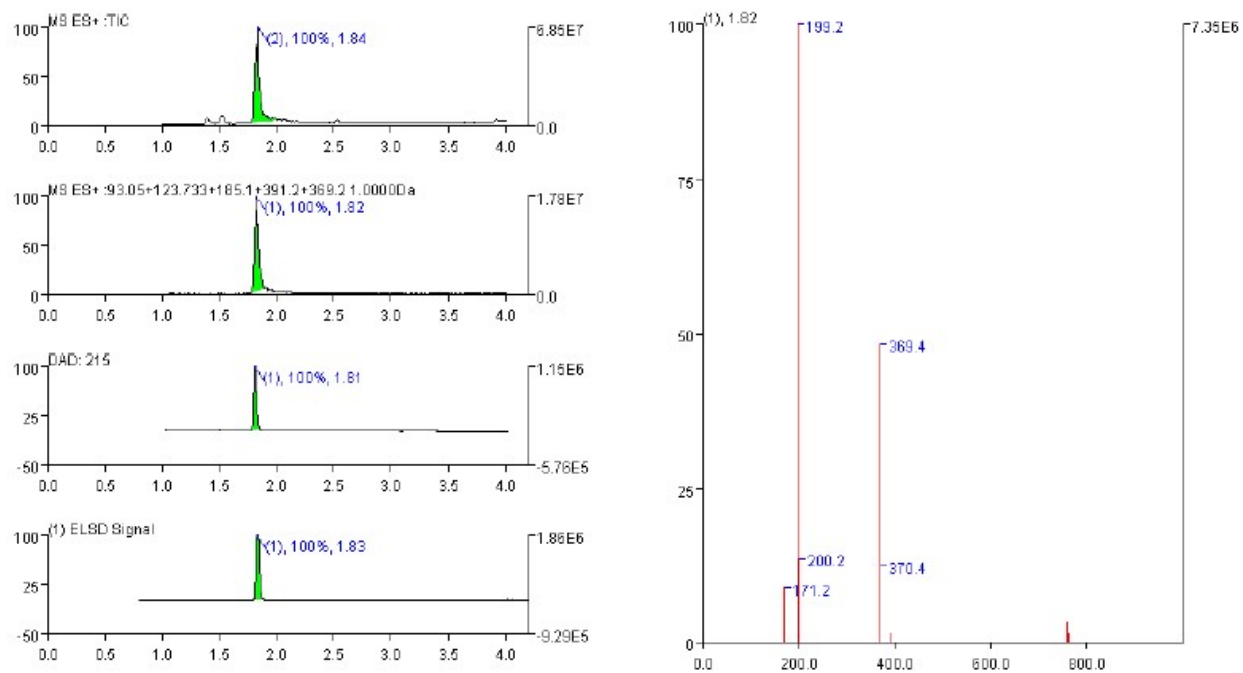

**7i** - 24.0 mg product obtained. LC-MS data – Ret. time 1.83: MS ES+  $m/z$  311.4 ( $[M+H]^+$ ).

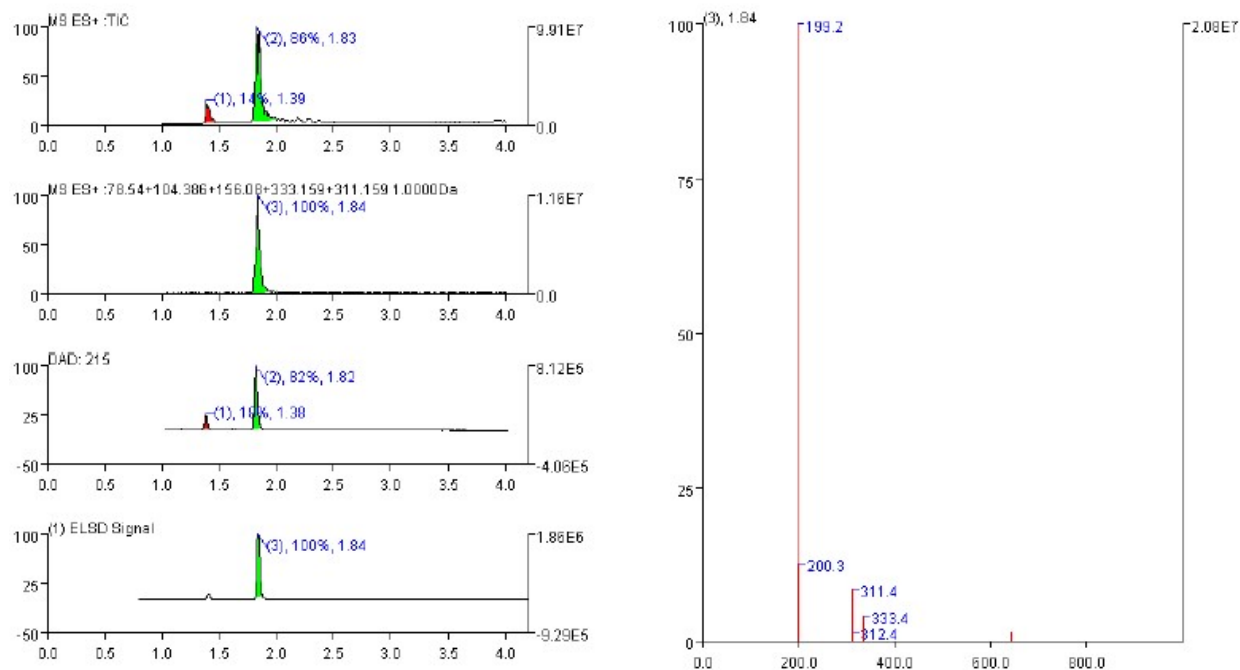

**7j** - 38.0 mg product obtained. LC-MS data – Ret. time 1.52: MS ES+  $m/z$  376.4 ( $[M+H]^+$ ).

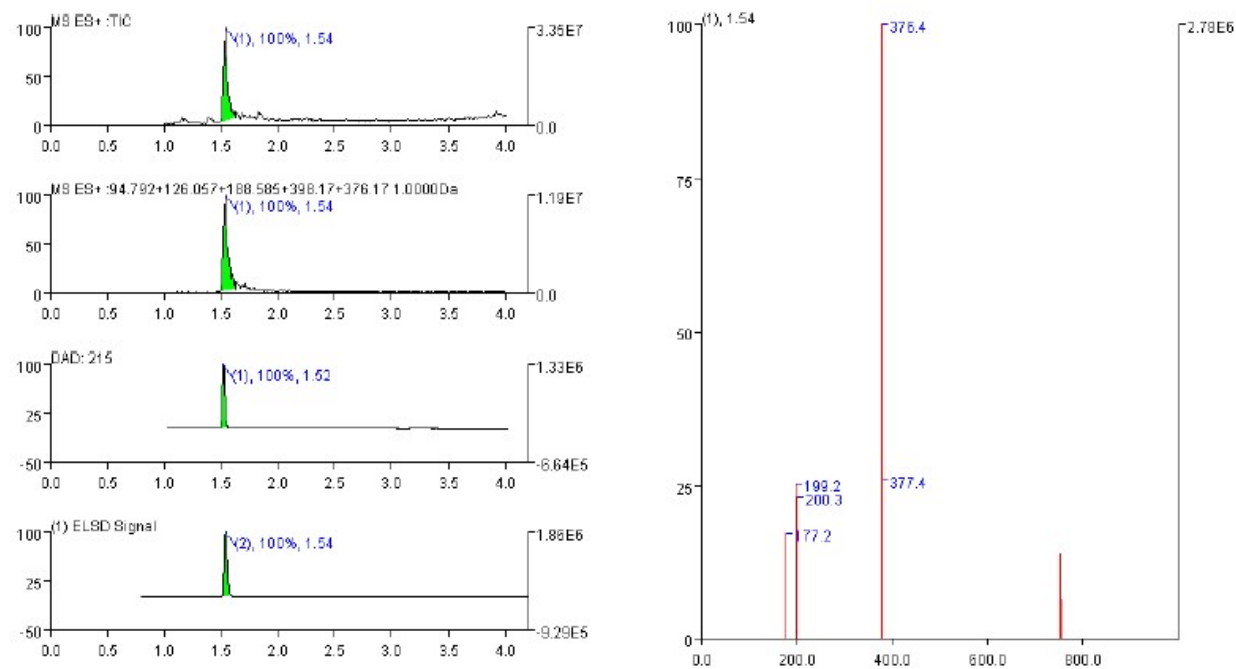

## **Characterization Data: Aldehyde Diversity Set**

*N-((2-bromo-3-chlorophenyl)(phenyl)methyl)pyridin-2-amine (9a)*

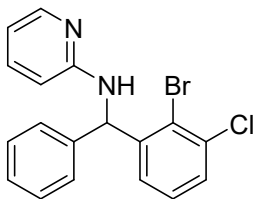

33 mg isolated according to General Library Procedure D.  $^1\text{H}$  NMR (400 MHz, DMSO- $d_6$ )  $\delta$  ppm 8.53 (br s, 1 H), 7.98 (d,  $J=5.46$  Hz, 1 H), 7.73 (t,  $J=7.41$  Hz, 1 H), 7.60 (d,  $J=7.80$  Hz, 1 H), 7.27 - 7.48 (m, 7 H), 6.91 (d,  $J=8.20$  Hz, 1 H), 6.76 (t,  $J=6.24$  Hz, 1 H), 6.49 (d,  $J=6.63$  Hz, 1 H);  $^{13}\text{C}$  NMR (101 MHz, DMSO- $d_6$ )  $\delta$  ppm 158.68, 158.35, 154.44, 143.37, 140.53, 139.39, 134.36, 129.53, 128.90, 128.60, 128.06, 127.74, 127.15, 123.68, 112.85, 58.92; HRMS (ESI)  $m/z$ :  $[\text{M} + \text{H}]^+$  calculated for  $\text{C}_{18}\text{H}_{14}\text{BrClN}_2$ , 373.0102; found, 373.0095.

*N-((2-bromo-5-chlorophenyl)(phenyl)methyl)pyridin-2-amine (9b)*

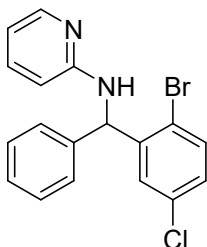

40 mg isolated according to General Library Procedure D.  $^1\text{H}$  NMR (400 MHz, DMSO- $d_6$ )  $\delta$  ppm 8.34 (s, 1 H), 7.99 (d,  $J=4.68$  Hz, 1 H), 7.69 (dd,  $J=8.20, 5.46$  Hz, 2 H), 7.27 - 7.45 (m, 7 H), 6.87 (d,  $J=8.98$  Hz, 1 H), 6.74 (t,  $J=6.24$  Hz, 1 H), 6.47 (d,  $J=7.40$  Hz, 1 H);  $^{13}\text{C}$  NMR (101 MHz, DMSO- $d_6$ )  $\delta$  ppm 154.83, 143.04, 140.05, 139.48, 134.62, 132.75, 129.26, 128.64, 128.45, 127.86 (2 peaks), 127.72, 121.96, 112.92, 110.77, 57.68; HRMS (ESI)  $m/z$ :  $[\text{M} + \text{H}]^+$  calculated for  $\text{C}_{18}\text{H}_{14}\text{BrClN}_2$ , 373.0102; found, 373.0093.

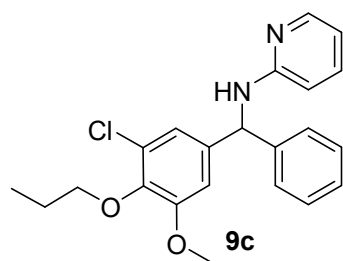

48 mg product obtained. LC-MS data – Ret. time 3.14: MS ES+  $m/z$  383 ( $[M+H]^+$ ).

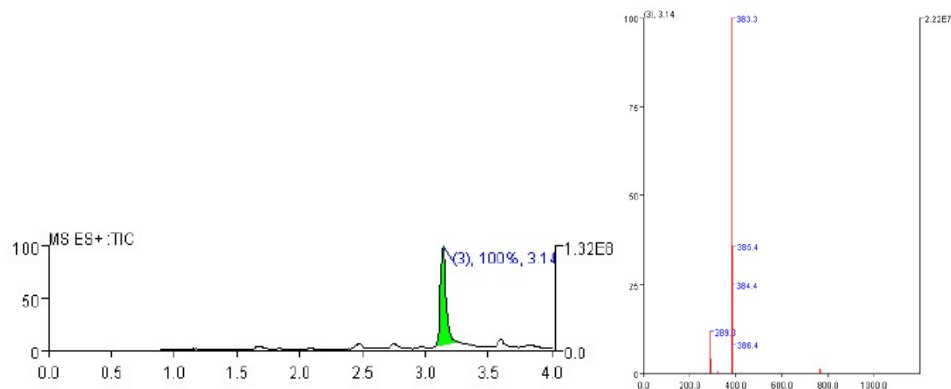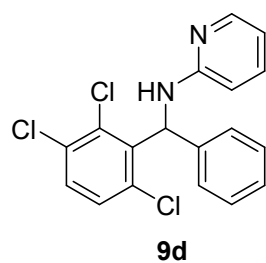

38 mg product obtained. LC-MS data – Ret. time 3.06: MS ES+  $m/z$  363 ( $[M+H]^+$ ).

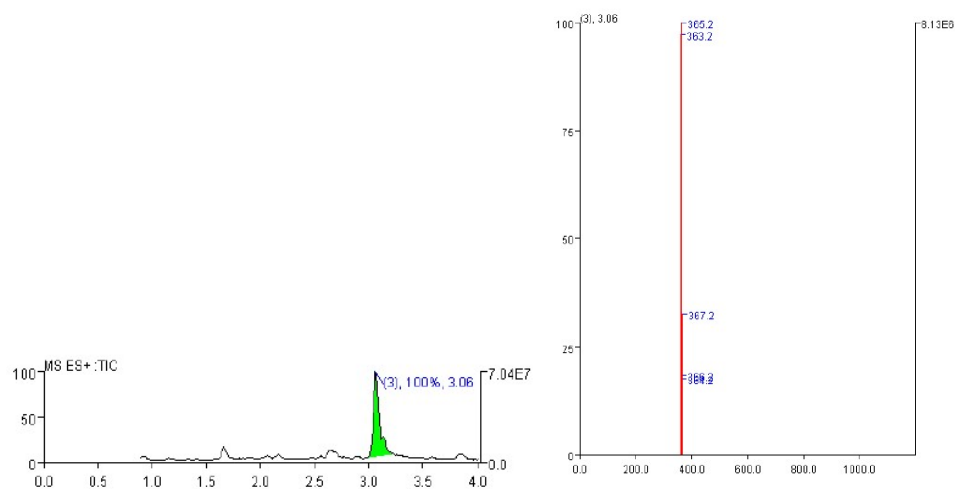

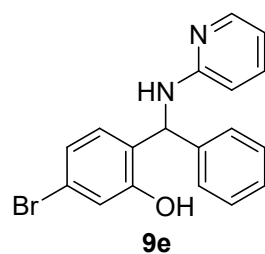

70 mg product obtained. LC-MS data – Ret. time 3.09: MS ES+  $m/z$  355 ( $[M+H]^+$ ).

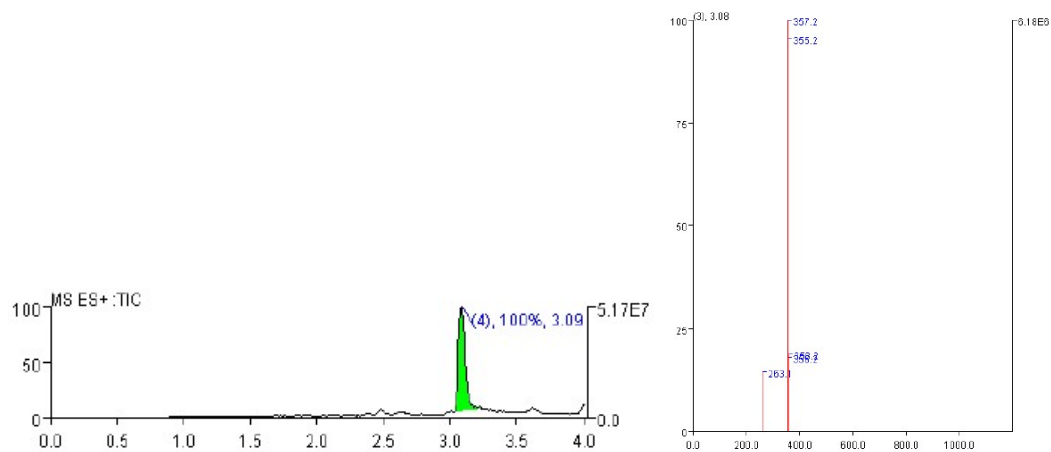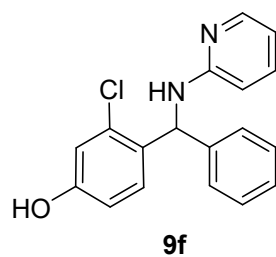

5.6 mg product obtained. LC-MS data – Ret. time 2.91: MS ES+  $m/z$  311 ( $[M+H]^+$ ).

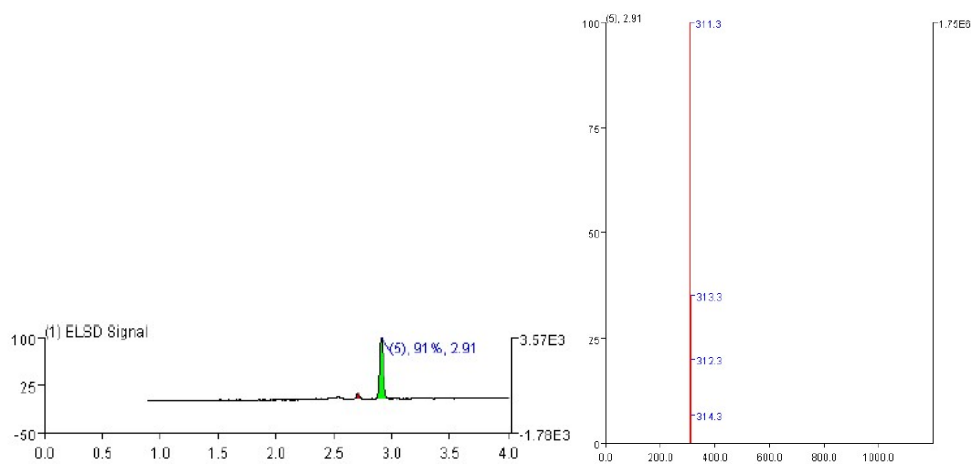

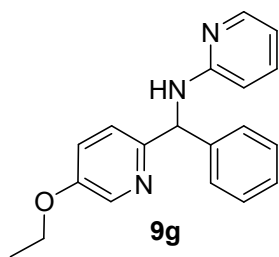

44 mg product obtained. LC-MS data – Ret. time 2.83: MS ES+  $m/z$  306 ( $[M+H]^+$ ).

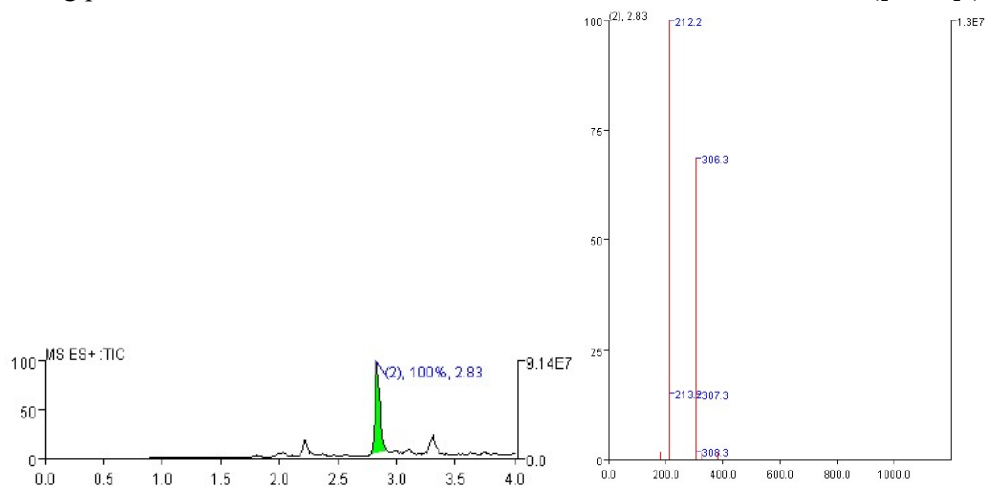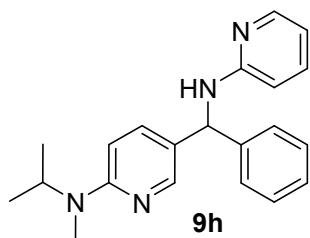

78 mg product obtained. LC-MS data – Ret. time 3.03: MS ES+  $m/z$  333 ( $[M+H]^+$ ).

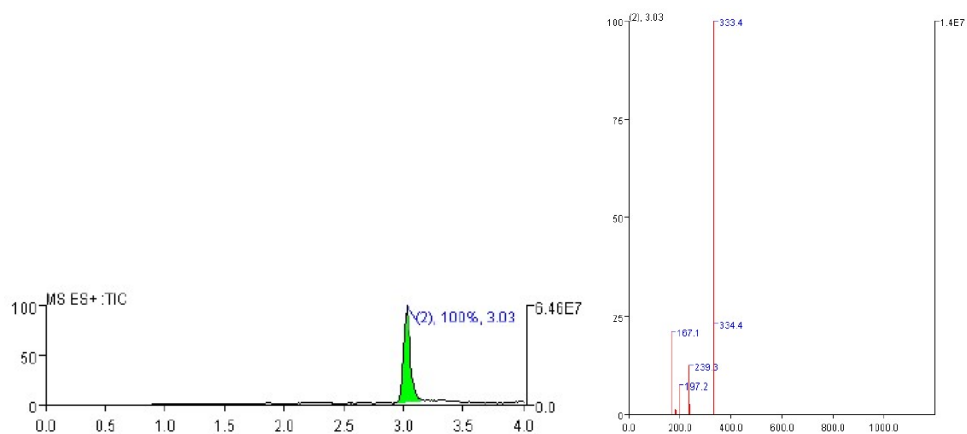

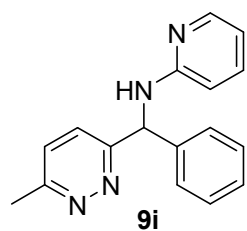

29 mg product obtained. LC-MS data – Ret. time 3.04: MS ES+  $m/z$  277 ( $[M+H]^+$ ).

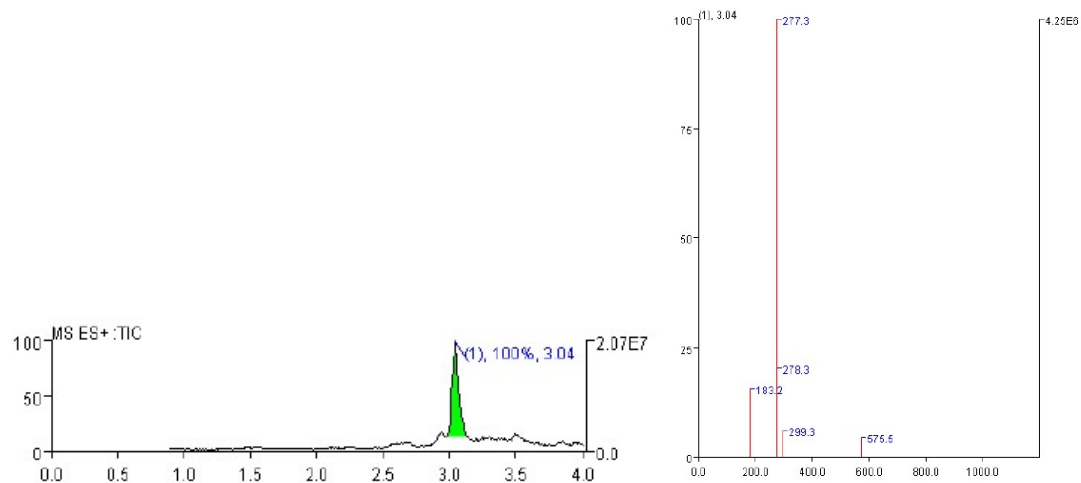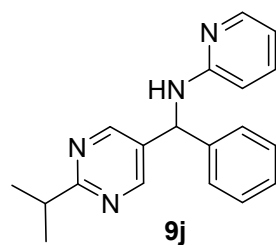

4.5 mg product obtained. LC-MS data – Ret. time 2.56: MS ES+  $m/z$  305 ( $[M+H]^+$ ).

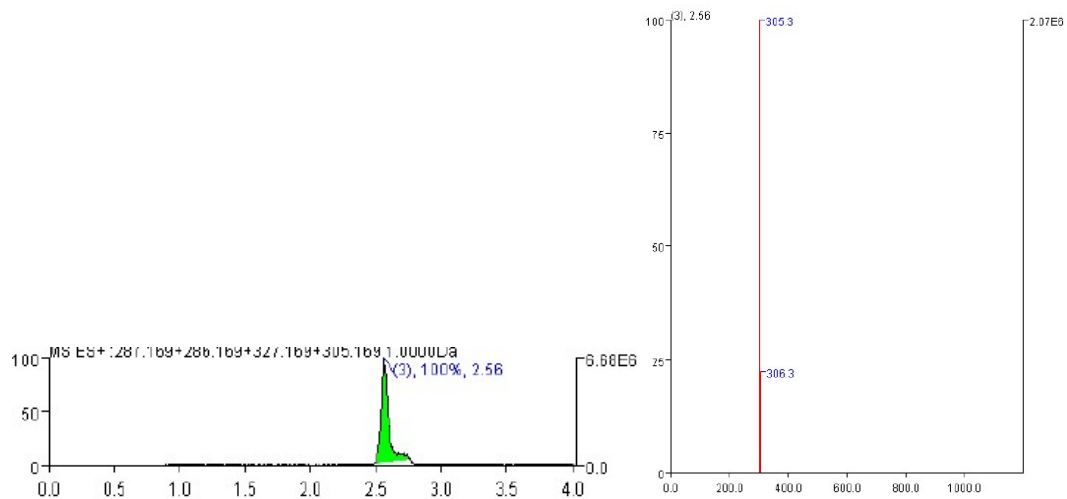

*N*-(phenyl(1-propyl-1H-pyrazol-5-yl)methyl)pyridin-2-amine (**9l**)

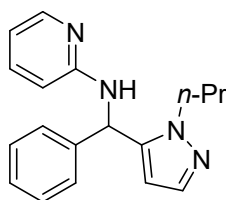

17 mg isolated according to General Library Procedure D.  $^1\text{H}$  NMR (400 MHz,  $\text{DMSO-d}_6$ )  $\delta$  = 7.98 - 7.94 (m, 1H), 7.46 - 7.39 (m, 4H), 7.38 - 7.34 (m, 2H), 7.32 (d,  $J$  = 2.0 Hz, 1H), 7.31 - 7.25 (m, 1H), 6.66 (d,  $J$  = 8.2 Hz, 1H), 6.54 (d,  $J$  = 7.4 Hz, 1H), 6.53 - 6.48 (m, 1H), 5.86 (d,  $J$  = 1.6 Hz, 1H), 3.99 (t,  $J$  = 7.2 Hz, 2H), 1.75 - 1.60 (m, 2H), 0.75 (t,  $J$  = 7.4 Hz, 3H)  $^{13}\text{C}$  NMR (101 MHz,  $\text{DMSO-d}_6$ )  $\delta$  = 157.84, 147.77, 144.71, 142.05, 137.79, 137.30, 128.78, 127.80, 127.67, 112.86, 109.53, 105.42, 50.71, 49.78, 23.57, 11.43 HRMS (ESI)  $m/z$ :  $[\text{M} + \text{H}]^+$  calcd for  $\text{C}_{18}\text{H}_{20}\text{N}_4$ , 293.1761; found, 293.1771.

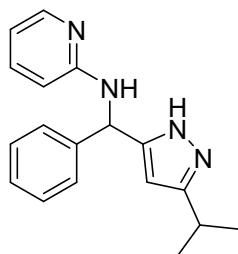

**9m**: 26.9 mg product obtained. LC-MS data – Ret. time 1.90: MS ES+  $m/z$  293.4 ( $[\text{M} + \text{H}]^+$ ).

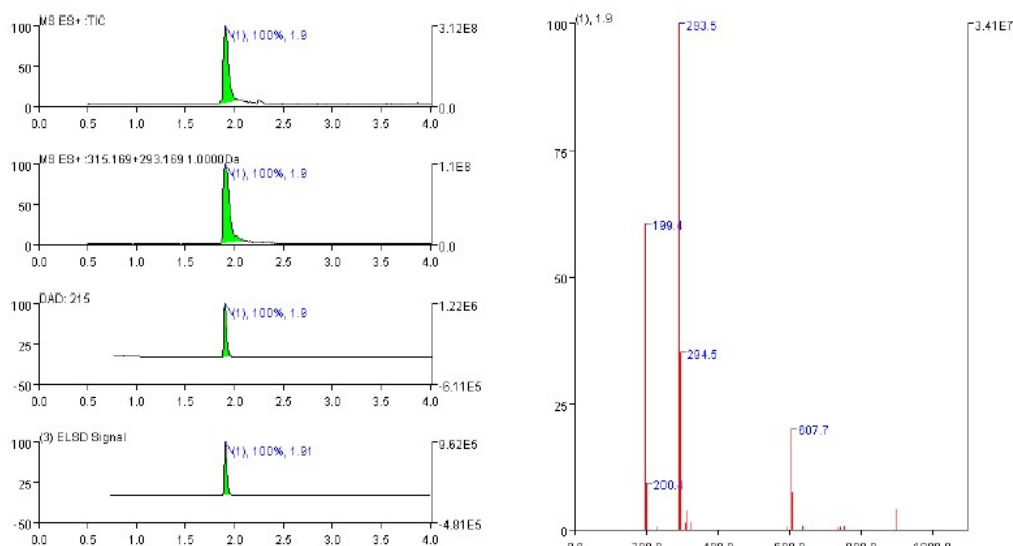

*N-((1-methyl-1H-pyrazol-4-yl)(phenyl)methyl)pyridin-2-amine (9n)*

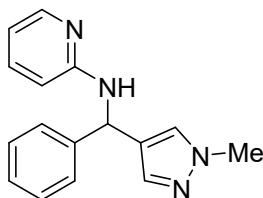

17 mg isolated according to General Library Procedure D.  $^1\text{H}$  NMR (400 MHz, DMSO- $d_6$ )  $\delta$  = 7.96 - 7.89 (m, 1H), 7.44 (s, 1H), 7.42 - 7.39 (m, 2H), 7.36 (ddd,  $J$  = 2.0, 6.9, 8.7 Hz, 1H), 7.33 - 7.28 (m, 2H), 7.27 (s, 1H), 7.24 - 7.17 (m, 2H), 6.61 (d,  $J$  = 8.6 Hz, 1H), 6.50 - 6.44 (m, 1H), 6.20 (d,  $J$  = 8.2 Hz, 1H), 3.82 - 3.73 (m, 3H);  $^{13}\text{C}$  NMR (101 MHz, DMSO- $d_6$ )  $\delta$  = 158.29, 147.84, 144.96, 137.77, 137.04, 129.39, 128.62, 127.23, 126.91, 124.84, 112.40, 109.29, 50.18, 38.88; HRMS (ESI)  $m/z$ : $[\text{M} + \text{H}]^+$  calcd for  $\text{C}_{16}\text{H}_{16}\text{N}_4$ , 265.1448; found, 265.1456.

*N-(phenyl(1-propyl-1H-pyrazol-4-yl)methyl)pyridin-2-amine (9o)*

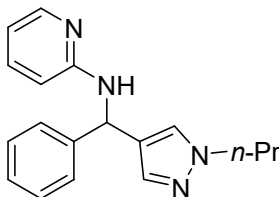

31 mg isolated according to General Library Procedure D.  $^1\text{H}$  NMR (400 MHz, DMSO- $d_6$ )  $\delta$  = 7.95 - 7.91 (m, 1H), 7.49 - 7.47 (m, 1H), 7.43 - 7.39 (m, 2H), 7.39 - 7.34 (m, 1H), 7.34 - 7.27 (m, 3H), 7.24 - 7.18 (m, 2H), 6.62 (d,  $J$  = 8.6 Hz, 1H), 6.49 - 6.44 (m, 1H), 6.24 - 6.20 (m, 1H), 4.01 - 3.95 (m, 2H), 1.73 (sxt,  $J$  = 7.2 Hz, 2H), 0.84 - 0.78 (m, 3H)  $^{13}\text{C}$  NMR (101 MHz, DMSO- $d_6$ )  $\delta$  = 158.28, 147.80, 144.99, 137.72, 137.07, 128.62, 128.57, 127.25, 126.91, 124.34, 112.39, 109.29, 53.23, 50.20, 23.77, 11.45 HRMS (ESI)  $m/z$ : $[\text{M} + \text{H}]^+$  calcd for  $\text{C}_{18}\text{H}_{20}\text{N}_4$ , 293.1761; found, 293.1760.

*N-((1-isopropyl-1H-pyrazol-4-yl)(phenyl)methyl)pyridin-2-amine (9q)*

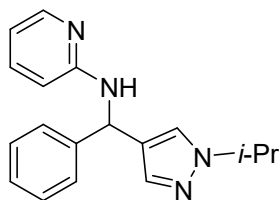

19 mg isolated according to General Library Procedure D.  $^1\text{H}$  NMR (400 MHz, DMSO- $d_6$ )  $\delta$  = 7.94 - 7.90 (m, 1H), 7.54 (s, 1H), 7.44 - 7.39 (m, 2H), 7.39 - 7.34 (m, 1H), 7.33 - 7.27 (m, 3H), 7.24 (d,  $J$  = 8.6 Hz, 1H), 7.22 - 7.17 (m, 1H), 6.62 (d,  $J$  = 8.2 Hz, 1H), 6.46 (ddd,  $J$  = 1.0, 5.5, 6.4 Hz, 1H), 6.22 (d,  $J$  = 8.6 Hz, 1H), 4.49 - 4.38 (m, 1H), 1.37 (d,  $J$  = 6.6 Hz, 6H)  $^{13}\text{C}$  NMR (101 MHz, DMSO- $d_6$ )  $\delta$  = 158.24, 147.79, 145.04, 137.36, 137.07, 128.63, 127.23, 126.89, 126.16, 124.12, 112.37, 109.29, 53.18, 50.24, 23.21; HRMS (ESI)  $m/z$ : $[\text{M} + \text{H}]^+$  calcd for  $\text{C}_{18}\text{H}_{20}\text{N}_4$ , 293.1761; found, 293.1760.

**9r** - 28.5 mg product obtained. LC-MS data – Ret. time 1.92: MS ES+  $m/z$  327.4 ( $[M+H]^+$ ).

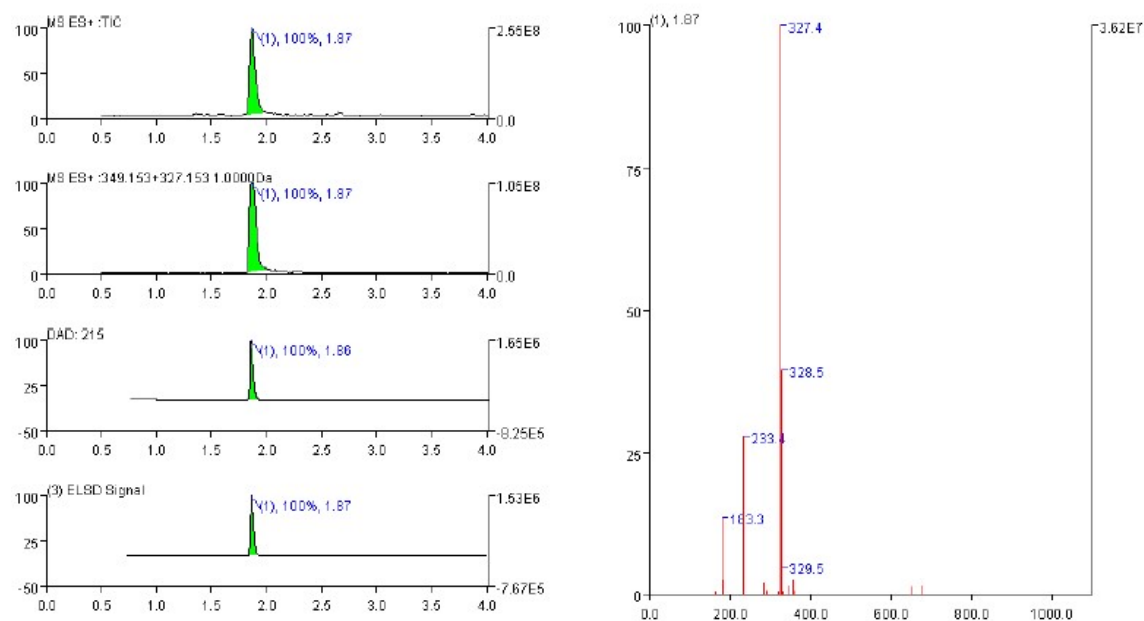

*N-((5,6-dihydro-4H-pyrrolo[1,2-b]pyrazol-3-yl)(phenyl)methyl)pyridin-2-amine (9s)*

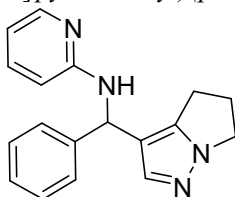

33 mg isolated according to General Library Procedure D.  $^1\text{H}$  NMR (400 MHz,  $\text{DMSO-d}_6$ )  $\delta$  = 7.94 - 7.90 (m, 1H), 7.42 - 7.37 (m, 2H), 7.37 - 7.28 (m, 3H), 7.27 (s, 1H), 7.24 - 7.19 (m, 1H), 7.14 (d,  $J$  = 8.2 Hz, 1H), 6.62 (d,  $J$  = 8.6 Hz, 1H), 6.49 - 6.44 (m, 1H), 6.15 (d,  $J$  = 8.2 Hz, 1H), 4.00 - 3.93 (m, 2H), 2.47 - 2.35 (m, 4H)  $^{13}\text{C}$  NMR (101 MHz,  $\text{DMSO-d}_6$ )  $\delta$  = 158.36, 147.84, 144.47, 143.63, 141.98, 137.01, 128.57, 127.29, 126.92, 116.94, 112.34, 109.24, 50.39, 47.43, 26.20, 22.57 HRMS (ESI)  $m/z$ :  $[M + H]^+$  calcd for  $\text{C}_{18}\text{H}_{18}\text{N}_4$ , 291.1604; found, 291.1610.

*N*-((phenyl(4,5,6,7-tetrahydropyrazolo[1,5-*a*]pyridin-3-yl)methyl)pyridin-2-amine (**9t**)

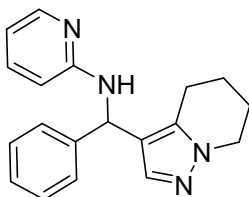

6.5 mg isolated according to General Library Procedure D.  $^1\text{H}$  NMR (400 MHz, DMSO- $d_6$ )  $\delta$  = 7.94 - 7.89 (m, 1H), 7.39 - 7.34 (m, 3H), 7.34 - 7.33 (m, 1H), 7.34 - 7.28 (m, 2H), 7.23 - 7.17 (m, 1H), 7.14 - 7.09 (m, 2H), 6.61 (d,  $J$  = 8.6 Hz, 1H), 6.48 - 6.43 (m, 1H), 6.13 (d,  $J$  = 8.2 Hz, 1H), 4.00 (t,  $J$  = 6.0 Hz, 2H), 2.59 (t,  $J$  = 6.4 Hz, 2H), 1.95 - 1.87 (m, 2H), 1.78 - 1.70 (m, 2H)  $^{13}\text{C}$  NMR (101 MHz, DMSO- $d_6$ )  $\delta$  = 158.35, 147.81, 144.43, 137.31, 137.02, 136.35 - 136.20 (m, 1C), 128.54, 128.64 - 128.49 (m, 1C), 127.26, 127.35 - 127.11 (m, 1C), 126.80, 119.59, 112.27, 109.19, 49.66, 47.88, 23.29, 21.74, 20.18 HRMS (ESI)  $m/z$ : [M + H] $^+$  calcd for  $\text{C}_{19}\text{H}_{20}\text{N}_4$ , 305.1761; found, 305.1763.

*N*-((1-methyl-1H-imidazol-5-yl)(phenyl)methyl)pyridin-2-amine (**9u**)

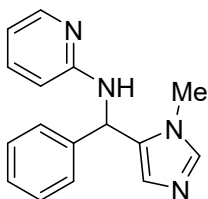

17 mg isolated according to General Library Procedure D.  $^1\text{H}$  NMR (400 MHz, DMSO- $d_6$ )  $\delta$  = 7.97 - 7.92 (m, 1H), 7.60 - 7.57 (m, 1H), 7.46 - 7.41 (m, 2H), 7.41 - 7.32 (m, 4H), 7.30 - 7.24 (m, 1H), 6.65 (d,  $J$  = 8.6 Hz, 1H), 6.53 - 6.47 (m, 1H), 6.38 (d,  $J$  = 8.6 Hz, 1H), 6.32 (s, 1H), 3.53 (s, 3H)  $^{13}\text{C}$  NMR (101 MHz, DMSO- $d_6$ )  $\delta$  = 158.02, 147.79, 142.02, 139.04, 137.22, 134.12, 128.63, 128.03, 127.70, 127.49, 112.75, 109.45, 49.30, 31.69 HRMS (ESI)  $m/z$ : [M + H] $^+$  calcd for  $\text{C}_{16}\text{H}_{16}\text{N}_4$ , 265.1448; found, 265.1454.

*N*-((1-methyl-1H-imidazol-4-yl)(phenyl)methyl)pyridin-2-amine (**9v**)

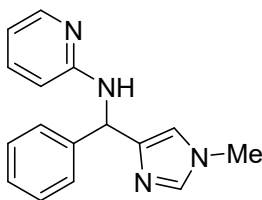

15 mg isolated according to General Library Procedure D.  $^1\text{H}$  NMR (400 MHz, DMSO- $d_6$ )  $\delta$  = 7.95 - 7.89 (m, 1H), 7.50 (d,  $J$  = 1.2 Hz, 1H), 7.43 - 7.39 (m, 2H), 7.37 - 7.32 (m, 1H), 7.30 - 7.25 (m, 2H), 7.21 - 7.15 (m, 1H), 7.02 (d,  $J$  = 8.2 Hz, 1H), 6.86 - 6.83 (m, 1H), 6.64 (d,  $J$  = 8.6 Hz, 1H), 6.48 - 6.43 (m, 1H), 6.12 (d,  $J$  = 8.2 Hz, 1H), 3.60 - 3.57 (m, 3H)  $^{13}\text{C}$  NMR (101 MHz, DMSO- $d_6$ )  $\delta$  = 158.35, 147.84, 144.52, 144.10, 137.97, 136.99, 128.36, 127.56, 126.75, 117.68, 112.29, 109.17, 53.07, 33.26 HRMS (ESI)  $m/z$ : [M + H] $^+$  calcd for  $\text{C}_{16}\text{H}_{16}\text{N}_4$ , 265.1448; found, 265.1445.

*N*-(phenyl(1-phenyl-1*H*-imidazol-4-yl)methyl)pyridin-2-amine (**9w**)

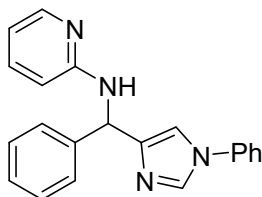

28 mg isolated according to General Library Procedure D.  $^1\text{H}$  NMR (400 MHz, DMSO- $d_6$ )  $\delta$  = 8.24 - 8.21 (m, 1H), 7.95 (dd,  $J$  = 1.4, 4.9 Hz, 1H), 7.63 - 7.59 (m, 2H), 7.55 (d,  $J$  = 0.8 Hz, 1H), 7.54 - 7.46 (m, 4H), 7.40 - 7.34 (m, 2H), 7.34 - 7.28 (m, 2H), 7.23 - 7.16 (m, 2H), 6.70 (d,  $J$  = 8.2 Hz, 1H), 6.51 - 6.45 (m, 1H), 6.28 (d,  $J$  = 8.2 Hz, 1H)  $^{13}\text{C}$  NMR (101 MHz, DMSO- $d_6$ )  $\delta$  = 158.40 - 158.20 (m, 1C), 147.84, 145.50, 144.12, 137.31, 137.06, 135.71, 130.36, 128.46, 127.67, 127.27, 126.91, 120.61, 114.83, 112.44, 109.37, 52.85 HRMS (ESI)  $m/z$ : $[\text{M} + \text{H}]^+$  calcd for  $\text{C}_{21}\text{H}_{18}\text{N}_4$ , 327.1604; found, 327.1614.

*N*-((1-ethyl-1*H*-imidazol-2-yl)(phenyl)methyl)pyridin-2-amine (**9x**)

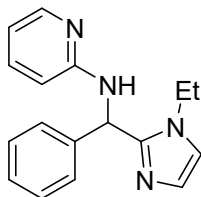

19 mg isolated according to General Library Procedure D.  $^1\text{H}$  NMR (400 MHz, DMSO- $d_6$ )  $\delta$  = 7.98 - 7.94 (m, 1H), 7.45 - 7.40 (m, 2H), 7.40 - 7.36 (m, 1H), 7.35 - 7.29 (m, 3H), 7.26 - 7.20 (m, 1H), 7.13 (d,  $J$  = 1.2 Hz, 1H), 6.86 - 6.83 (m, 1H), 6.75 - 6.70 (m, 1H), 6.52 - 6.47 (m, 2H), 0.00 (q,  $J$  = 7.0 Hz, 2H), 1.18 (t,  $J$  = 7.2 Hz, 3H)  $^{13}\text{C}$  NMR (101 MHz, DMSO- $d_6$ )  $\delta$  = 157.89, 147.84, 147.71, 141.94, 137.15, 128.52, 128.14, 127.37, 127.19, 119.94, 112.75, 109.67, 50.35, 40.57, 16.53 HRMS (ESI)  $m/z$ : $[\text{M} + \text{Na}]^+$  calcd for  $\text{C}_{17}\text{H}_{18}\text{N}_4$ , 301.1448; found, 301.1450.

**9y** - 30 mg product obtained. LC-MS data – Ret. time 1.29: MS ES+  $m/z$  327 ( $[M+H]^+$ ).

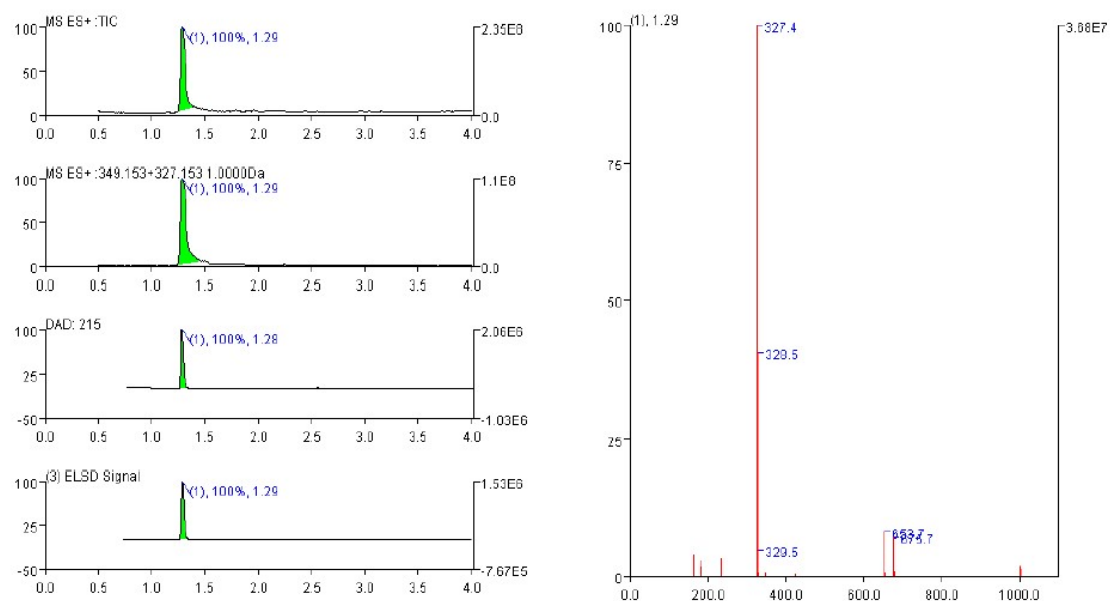

**9z** - 1.4 mg product obtained. LC-MS data – Ret. time 1.92: MS ES+  $m/z$  293.5 ( $[M+H]^+$ ).

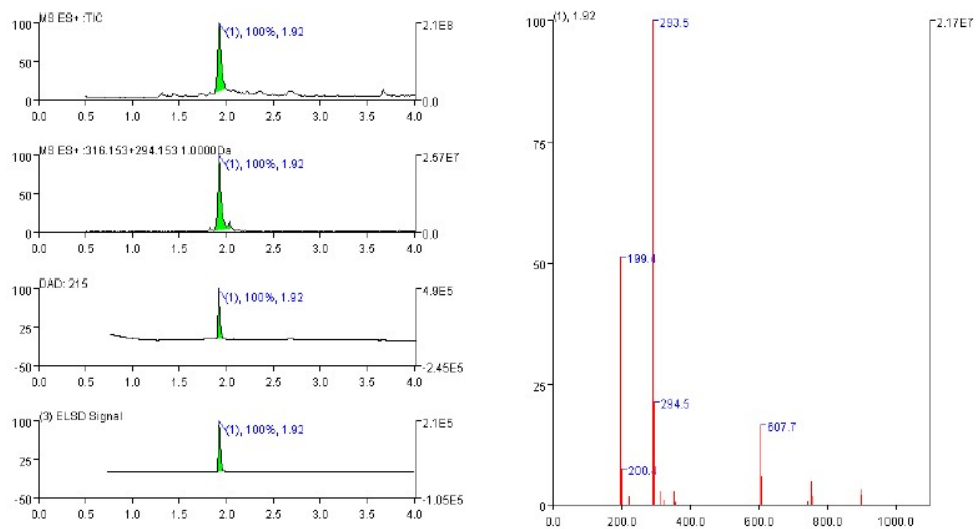

*N*-(phenyl(pyrazolo[1,5-*a*]pyridin-2-yl)methyl)pyridin-2-amine (**9aa**)

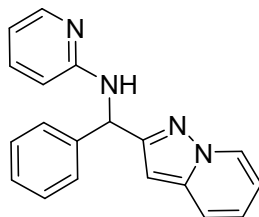

16 mg isolated according to General Library Procedure D.  $^1\text{H}$  NMR (400 MHz, DMSO- $d_6$ )  $\delta$  = 8.62 - 8.57 (m, 1H), 7.97 - 7.92 (m, 1H), 7.64 - 7.59 (m, 1H), 7.49 - 7.44 (m, 2H), 7.44 - 7.36 (m, 2H), 7.34 - 7.29 (m, 2H), 7.25 - 7.19 (m, 1H), 7.19 - 7.14 (m, 1H), 6.86 - 6.80 (m, 1H), 6.74 - 6.70 (m, 1H), 6.55 - 6.51 (m, 2H), 6.51 - 6.46 (m, 1H)  $^{13}\text{C}$  NMR (101 MHz, DMSO- $d_6$ )  $\delta$  = 158.28, 157.42, 147.82, 143.66, 140.73, 137.14, 128.99, 128.62, 127.71, 127.17, 124.06, 118.24, 112.62, 112.19, 109.48, 95.38, 53.25 HRMS (ESI)  $m/z$ :  $[\text{M} + \text{H}]^+$  calcd for  $\text{C}_{19}\text{H}_{16}\text{N}_4$ , 301.1448; found, 301.1450.

**9ab** -1.9 mg product obtained. LC-MS data – Ret. time 1.13: MS ES+  $m/z$  301.4 ( $[\text{M} + \text{H}]^+$ ).

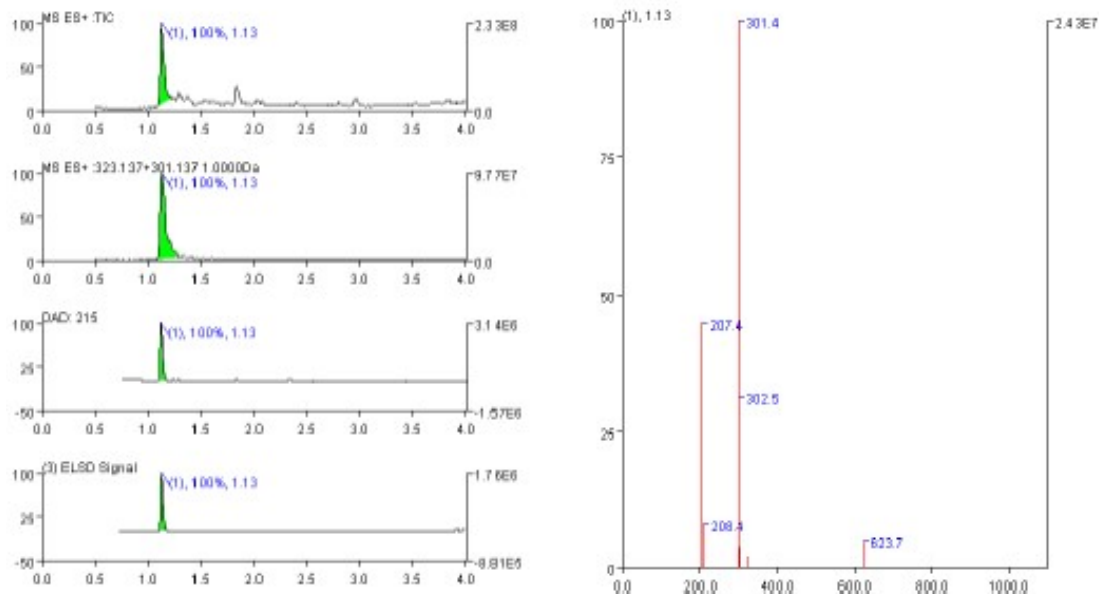

*N*-(phenyl(1*H*-pyrrolo[2,3-*b*]pyridin-3-yl)methyl)pyridin-2-amine (**9ac**)

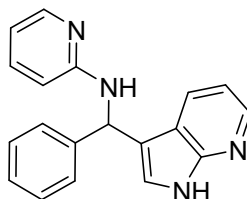

13 mg isolated according to General Library Procedure D.  $^1\text{H}$  NMR (400 MHz, DMSO- $\text{d}_6$ )  $\delta$  = 11.49 - 11.42 (m, 1H), 8.22 - 8.16 (m, 1H), 7.99 - 7.93 (m, 1H), 7.76 (dd,  $J$  = 1.4, 8.0 Hz, 1H), 7.47 (d,  $J$  = 7.0 Hz, 2H), 7.40 - 7.35 (m, 1H), 7.35 - 7.27 (m, 3H), 7.25 - 7.20 (m, 1H), 7.12 (d,  $J$  = 2.0 Hz, 1H), 6.99 (dd,  $J$  = 4.7, 7.8 Hz, 1H), 6.68 - 6.64 (m, 1H), 6.56 - 6.52 (m, 1H), 6.50 - 6.46 (m, 1H)  $^{13}\text{C}$  NMR (101 MHz, DMSO- $\text{d}_6$ )  $\delta$  = 158.49, 149.28, 147.88, 144.24, 143.09, 137.09, 128.56, 127.75, 127.59, 127.00, 124.00, 118.74, 116.99, 115.53, 112.35, 109.27, 51.47 HRMS (ESI)  $m/z$ :  $[\text{M} + \text{H}]^+$  calcd for  $\text{C}_{19}\text{H}_{16}\text{N}_4$ , 301.1448; found, 301.1451.

# Copies of <sup>1</sup>H

3a

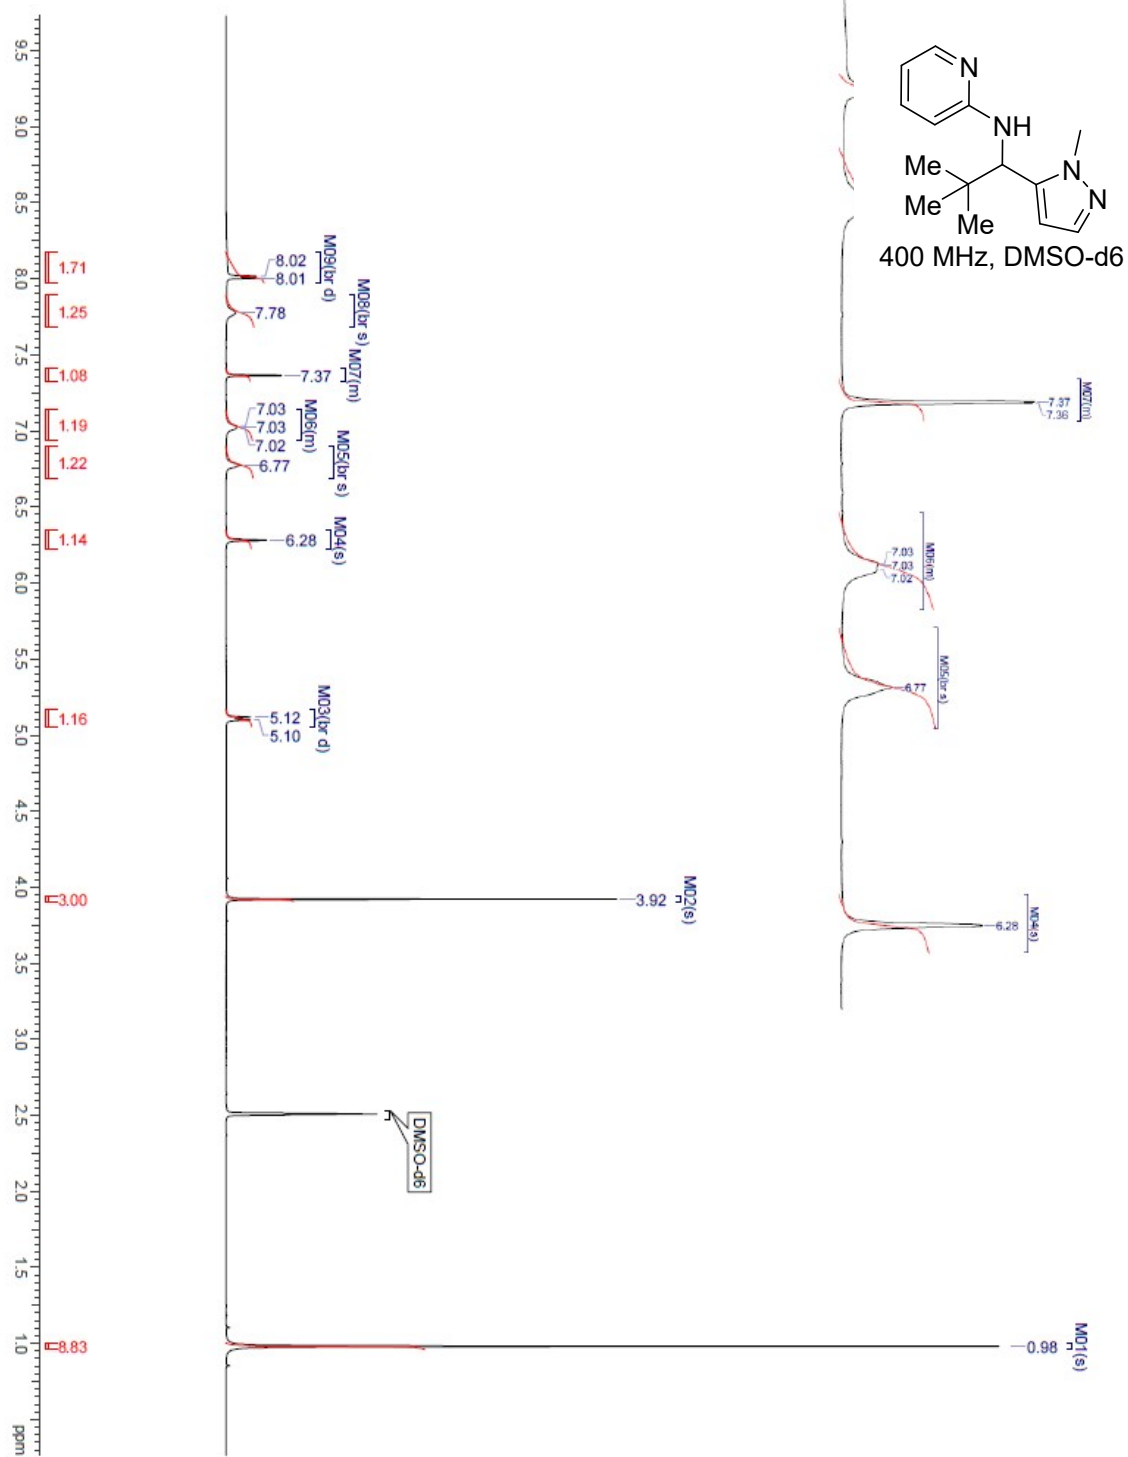

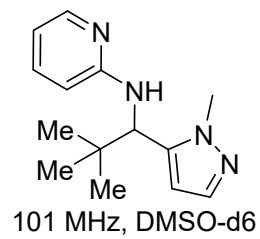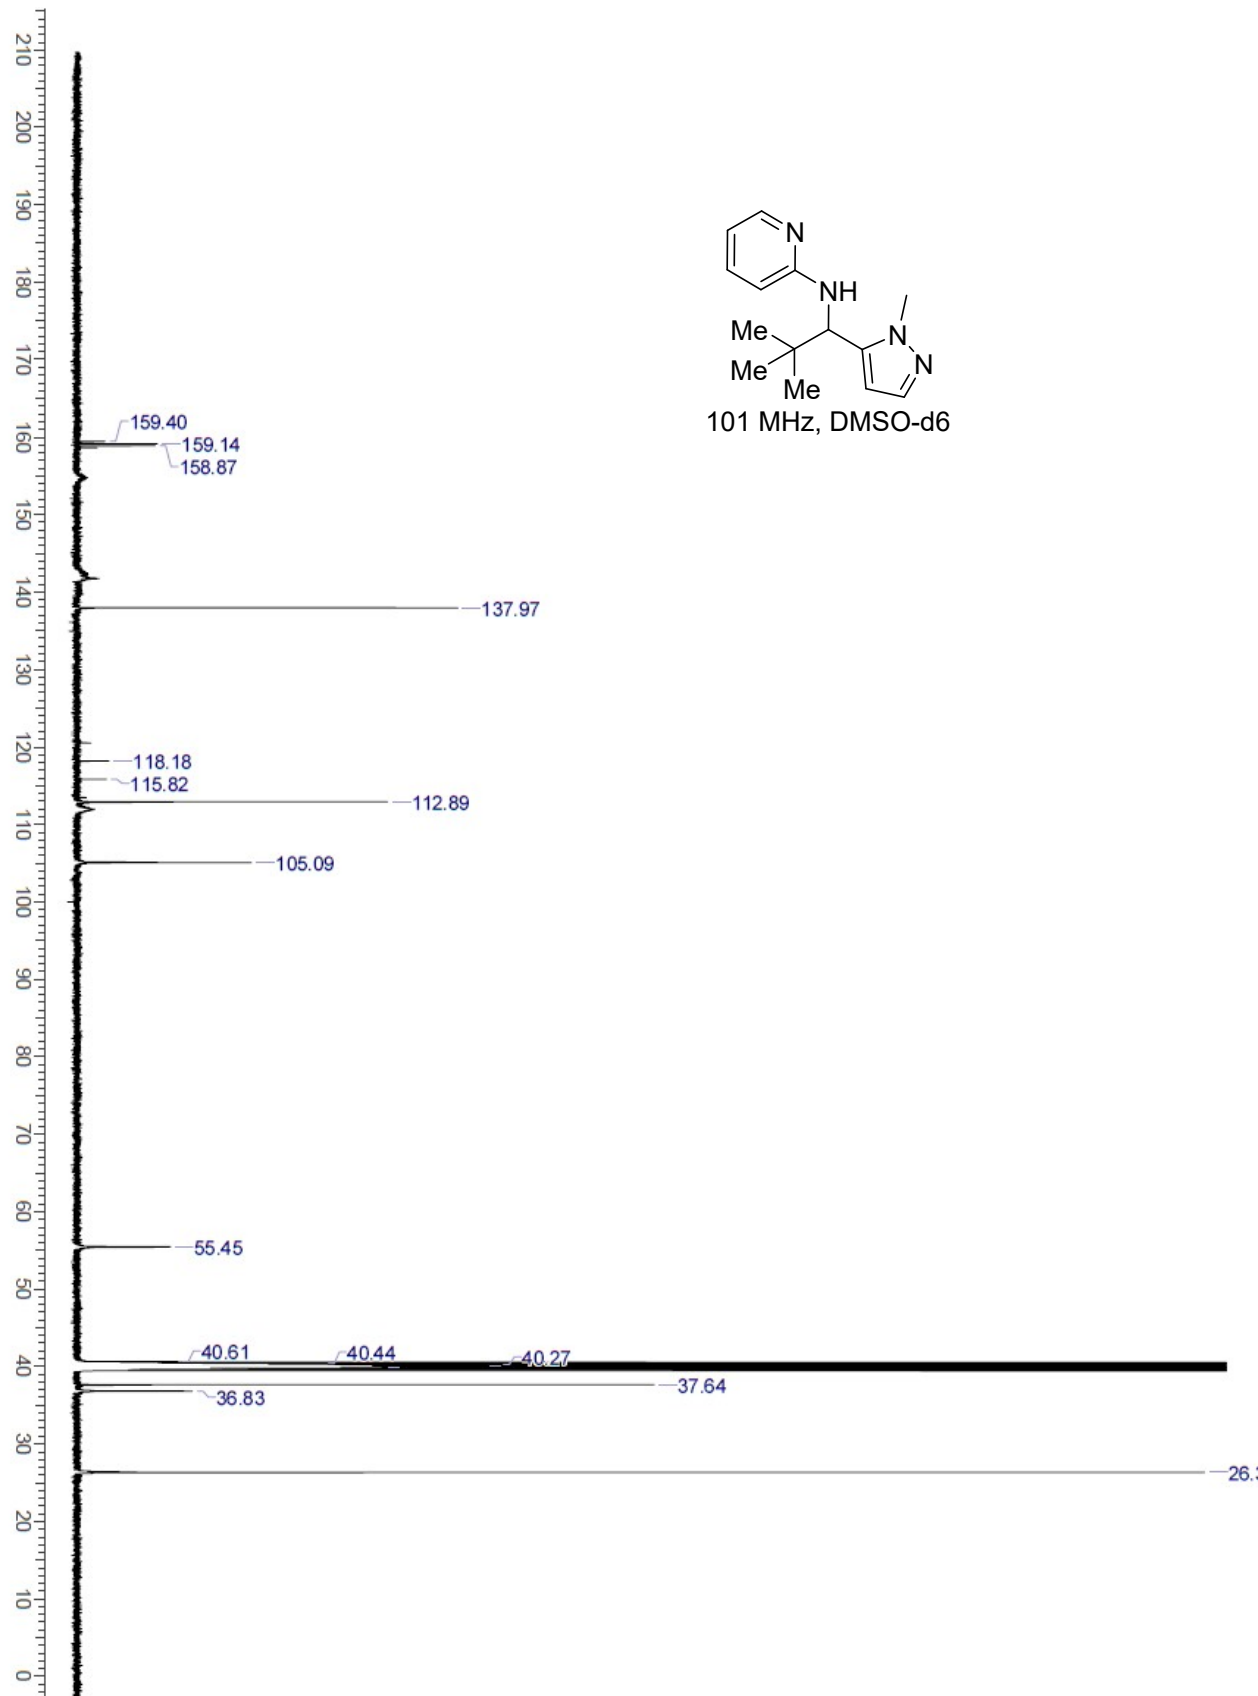

3b

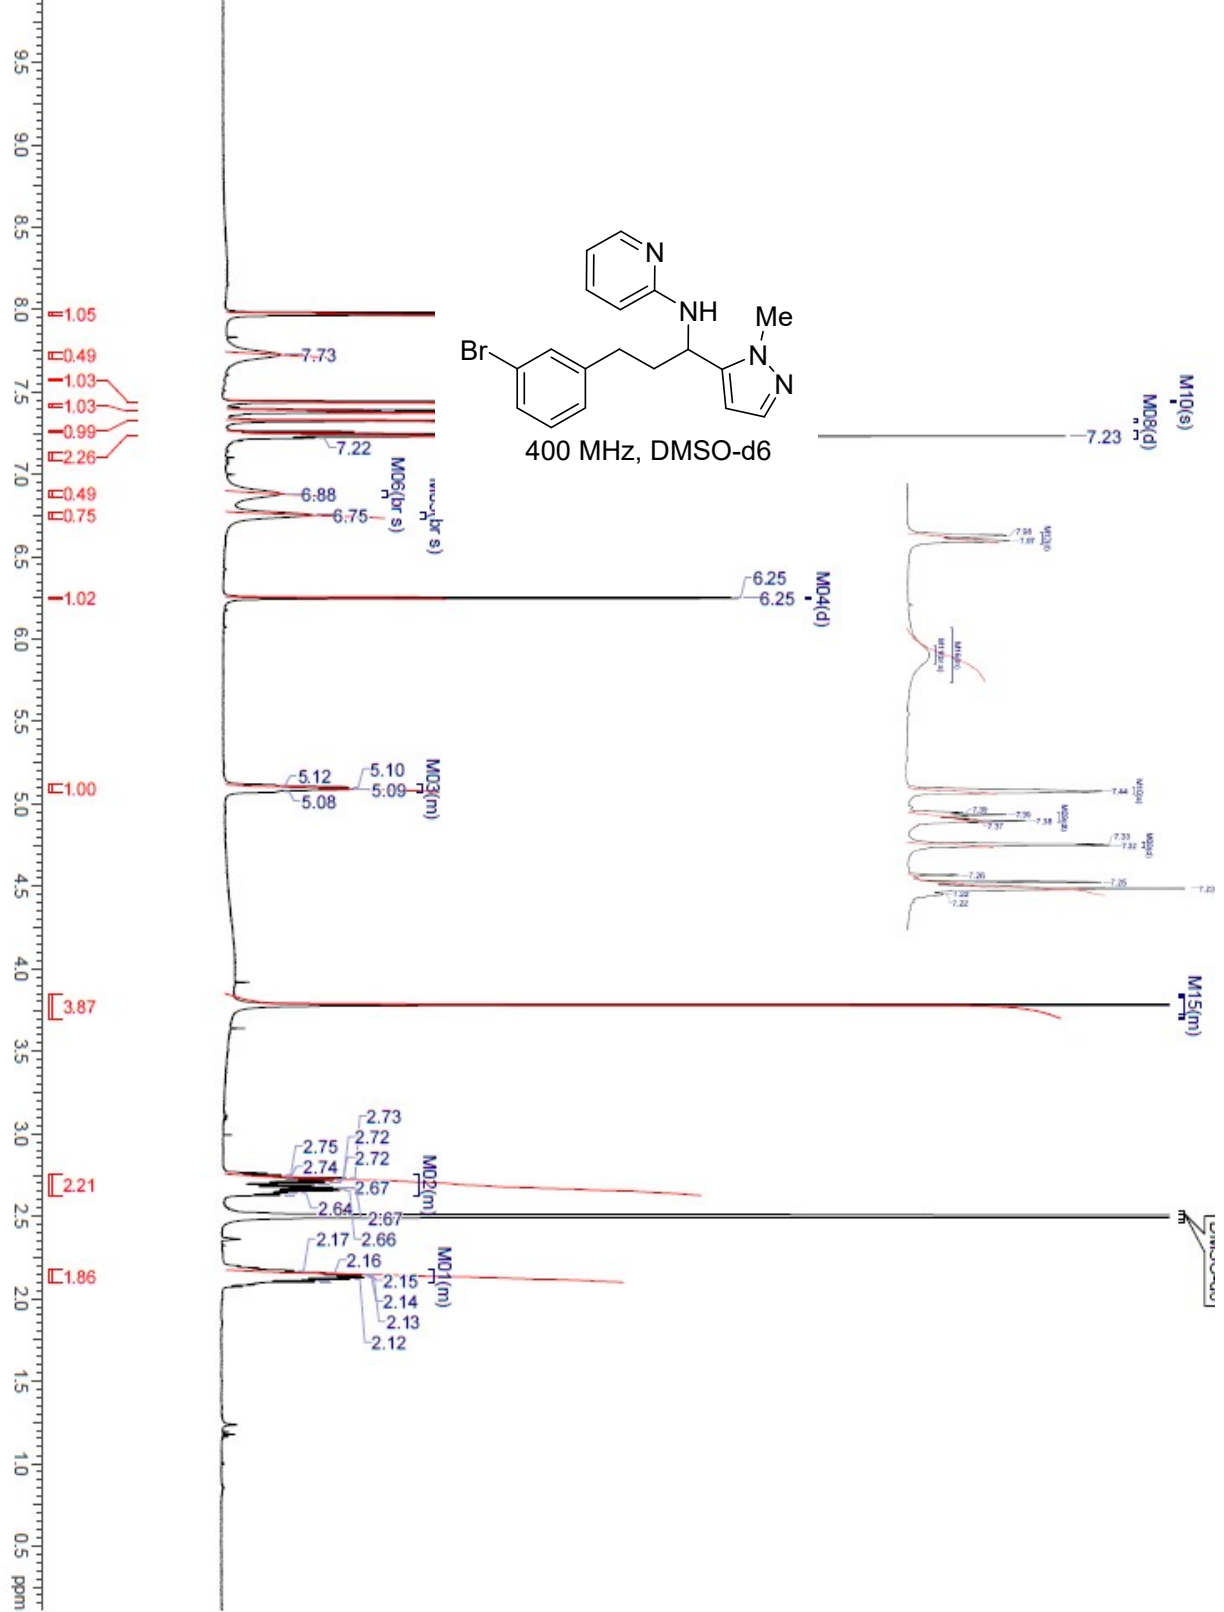

3f

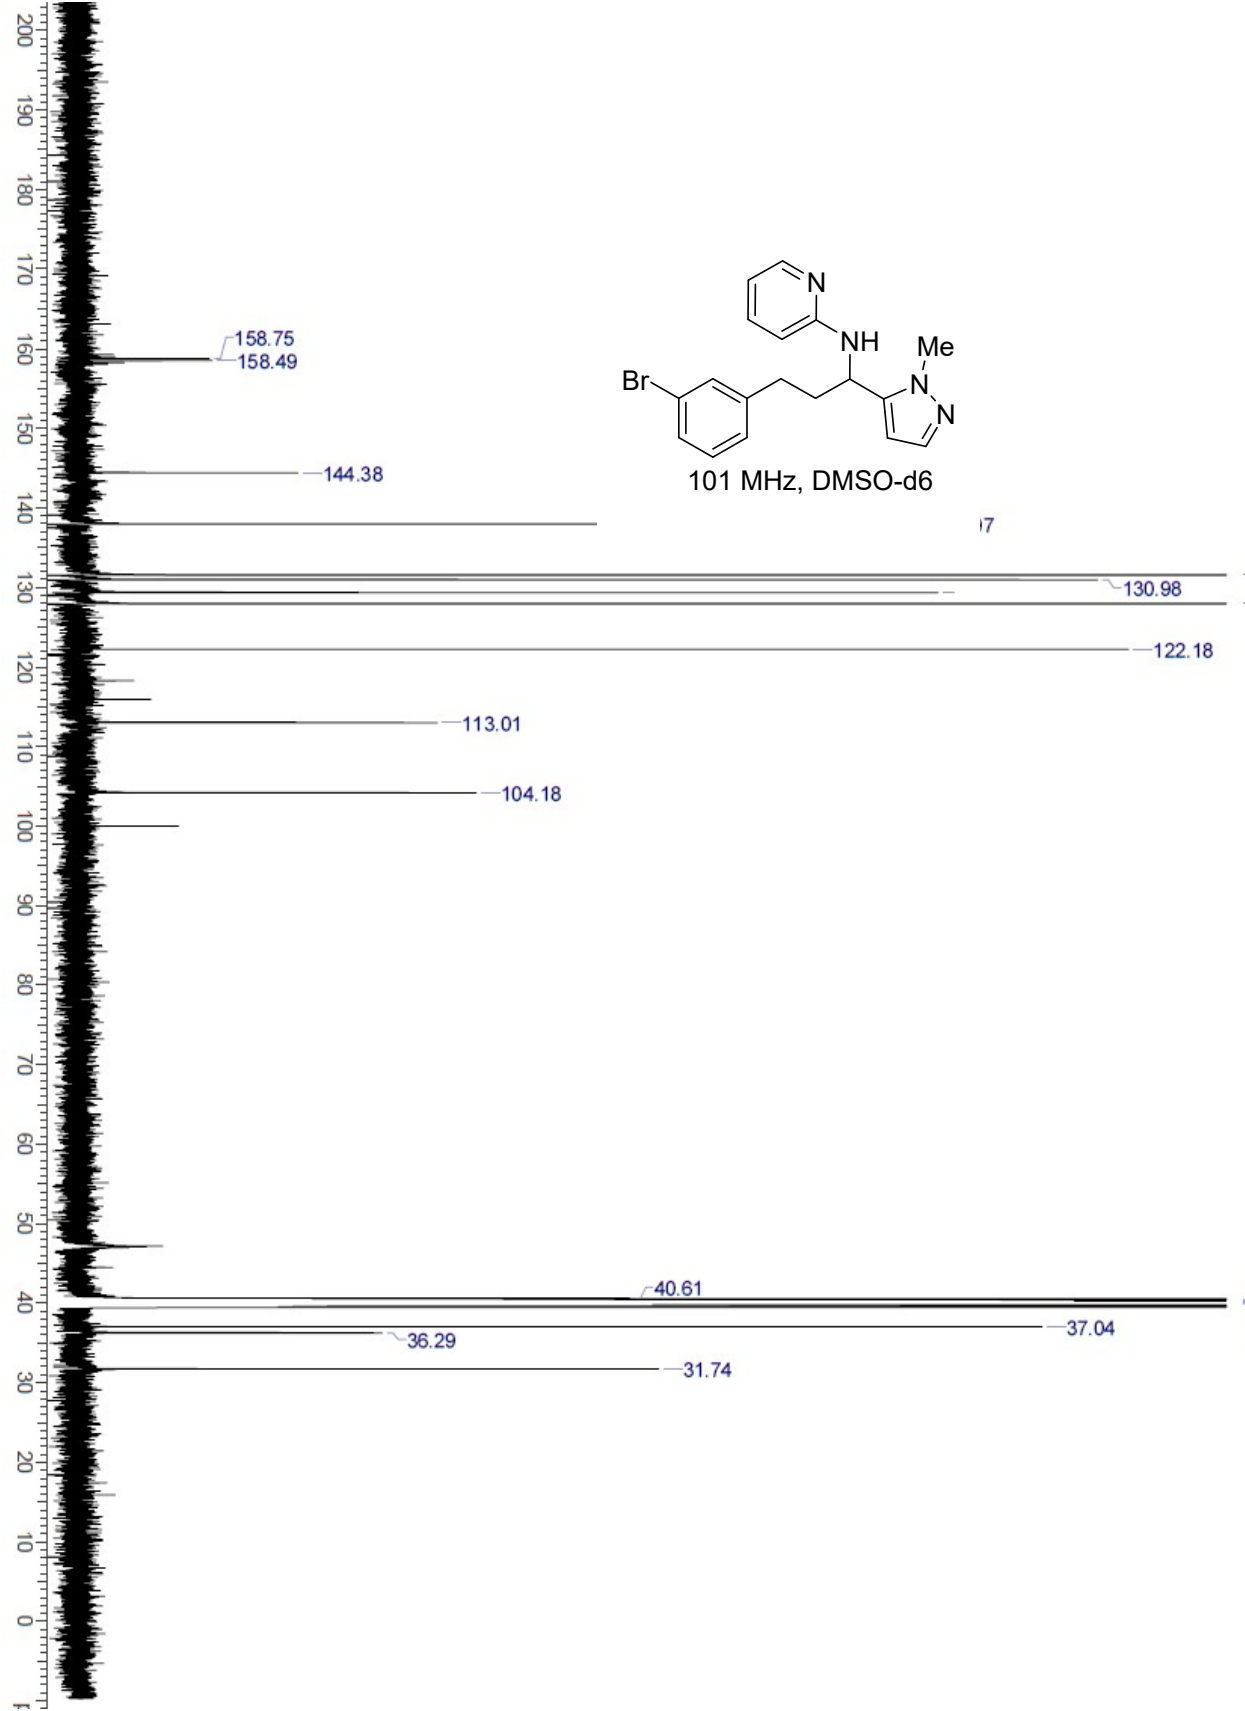

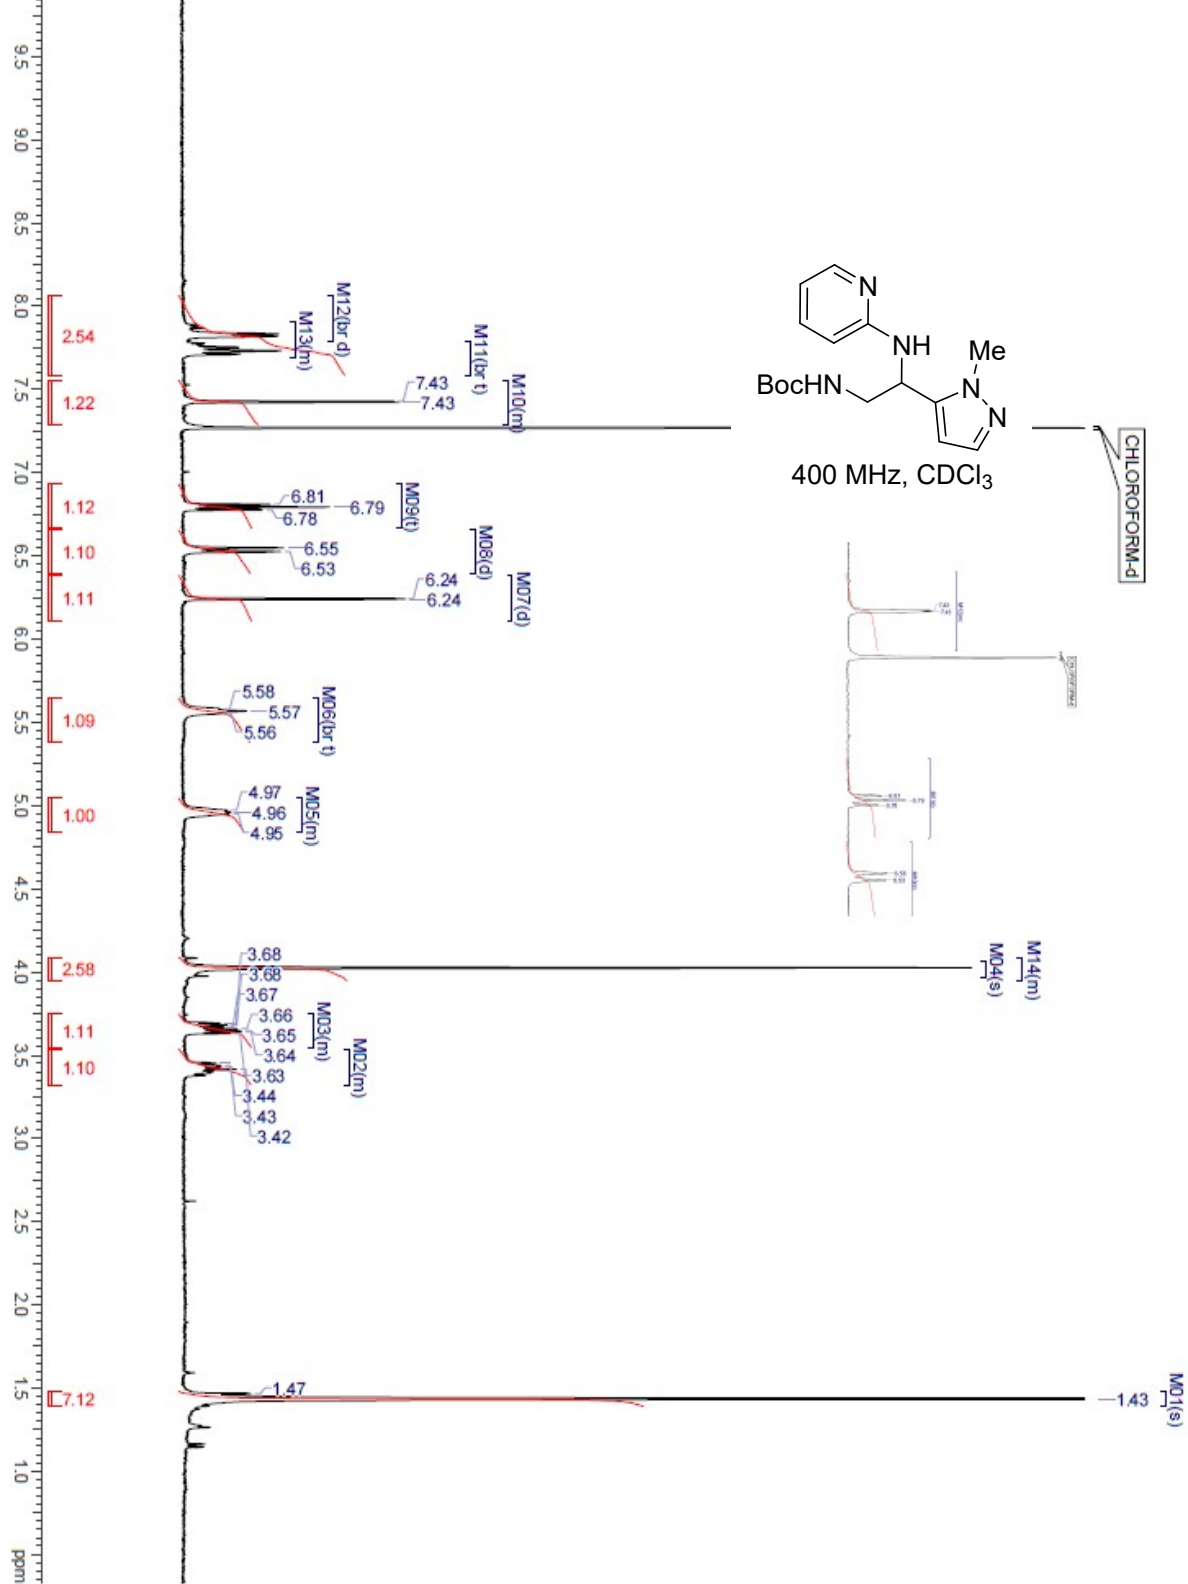

30

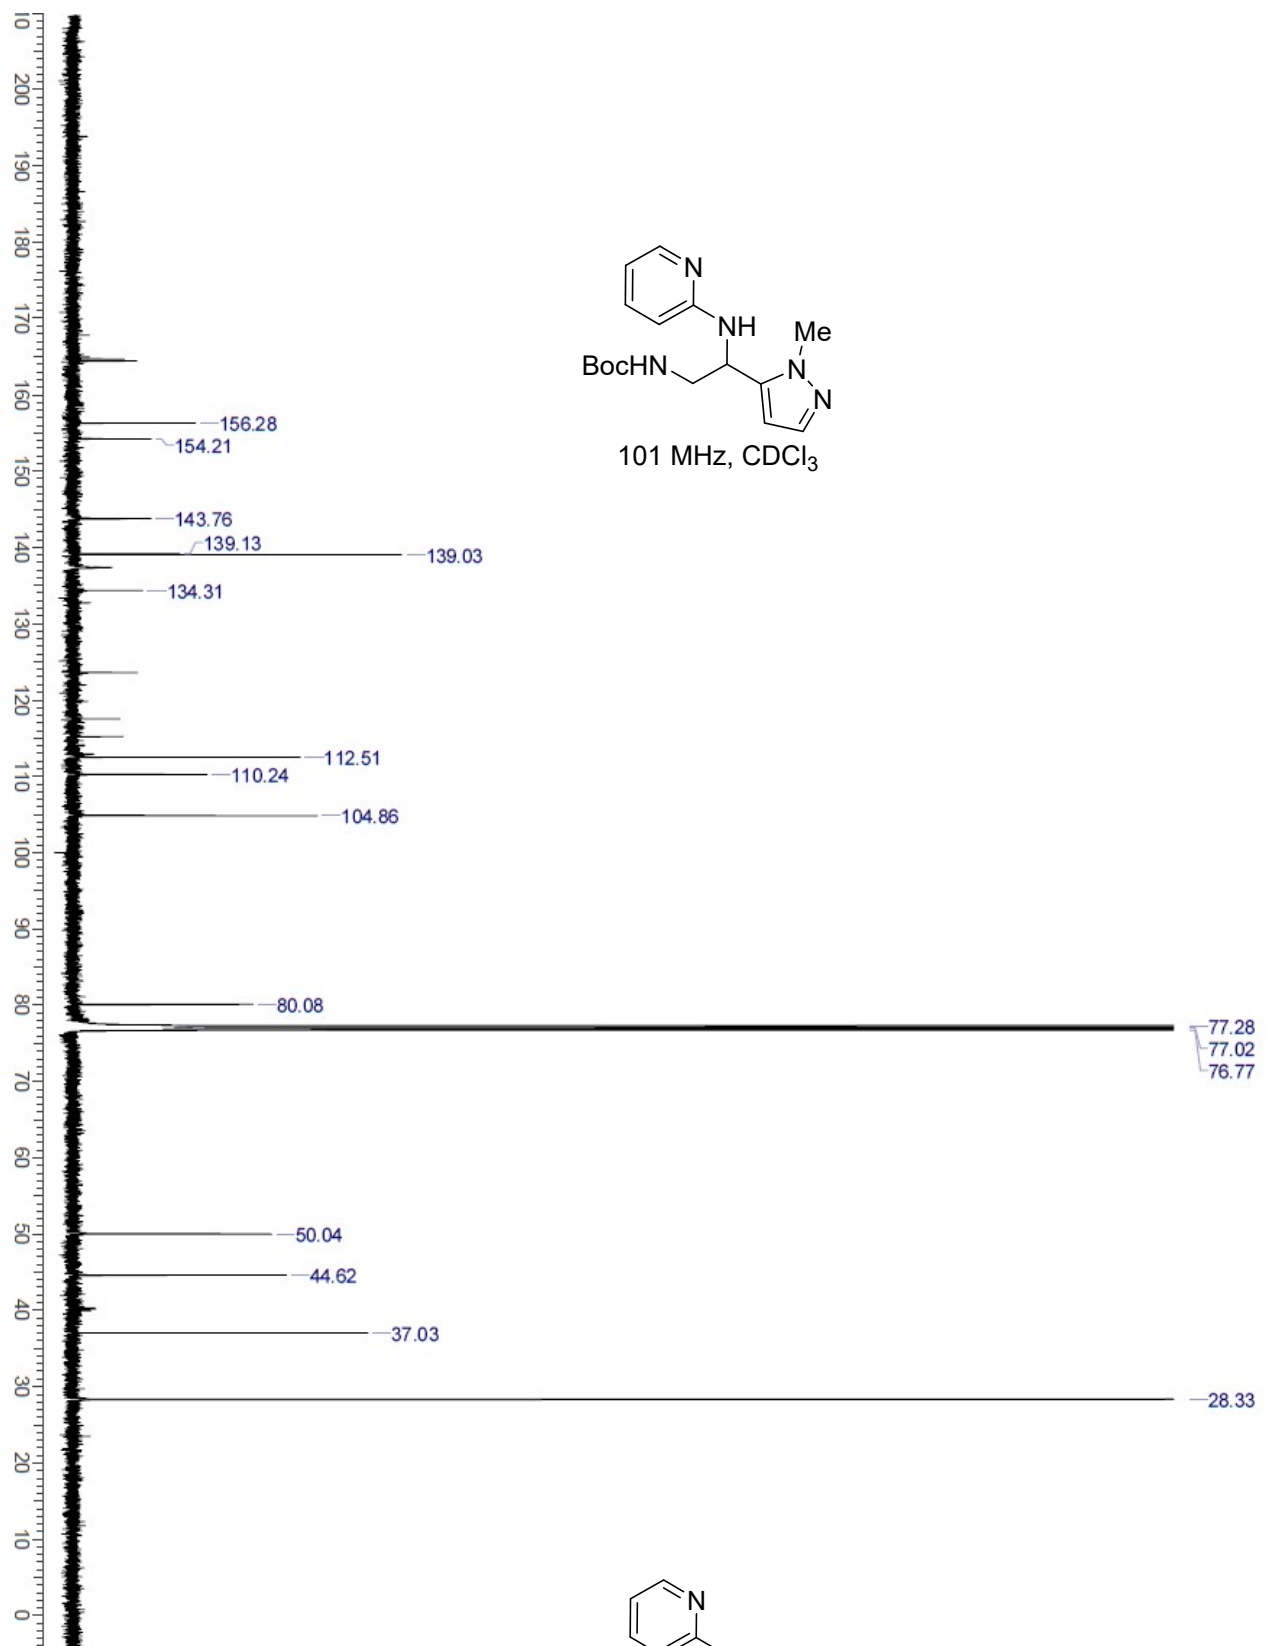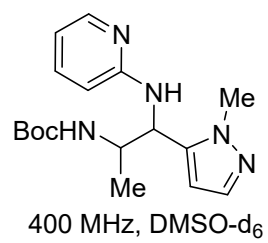

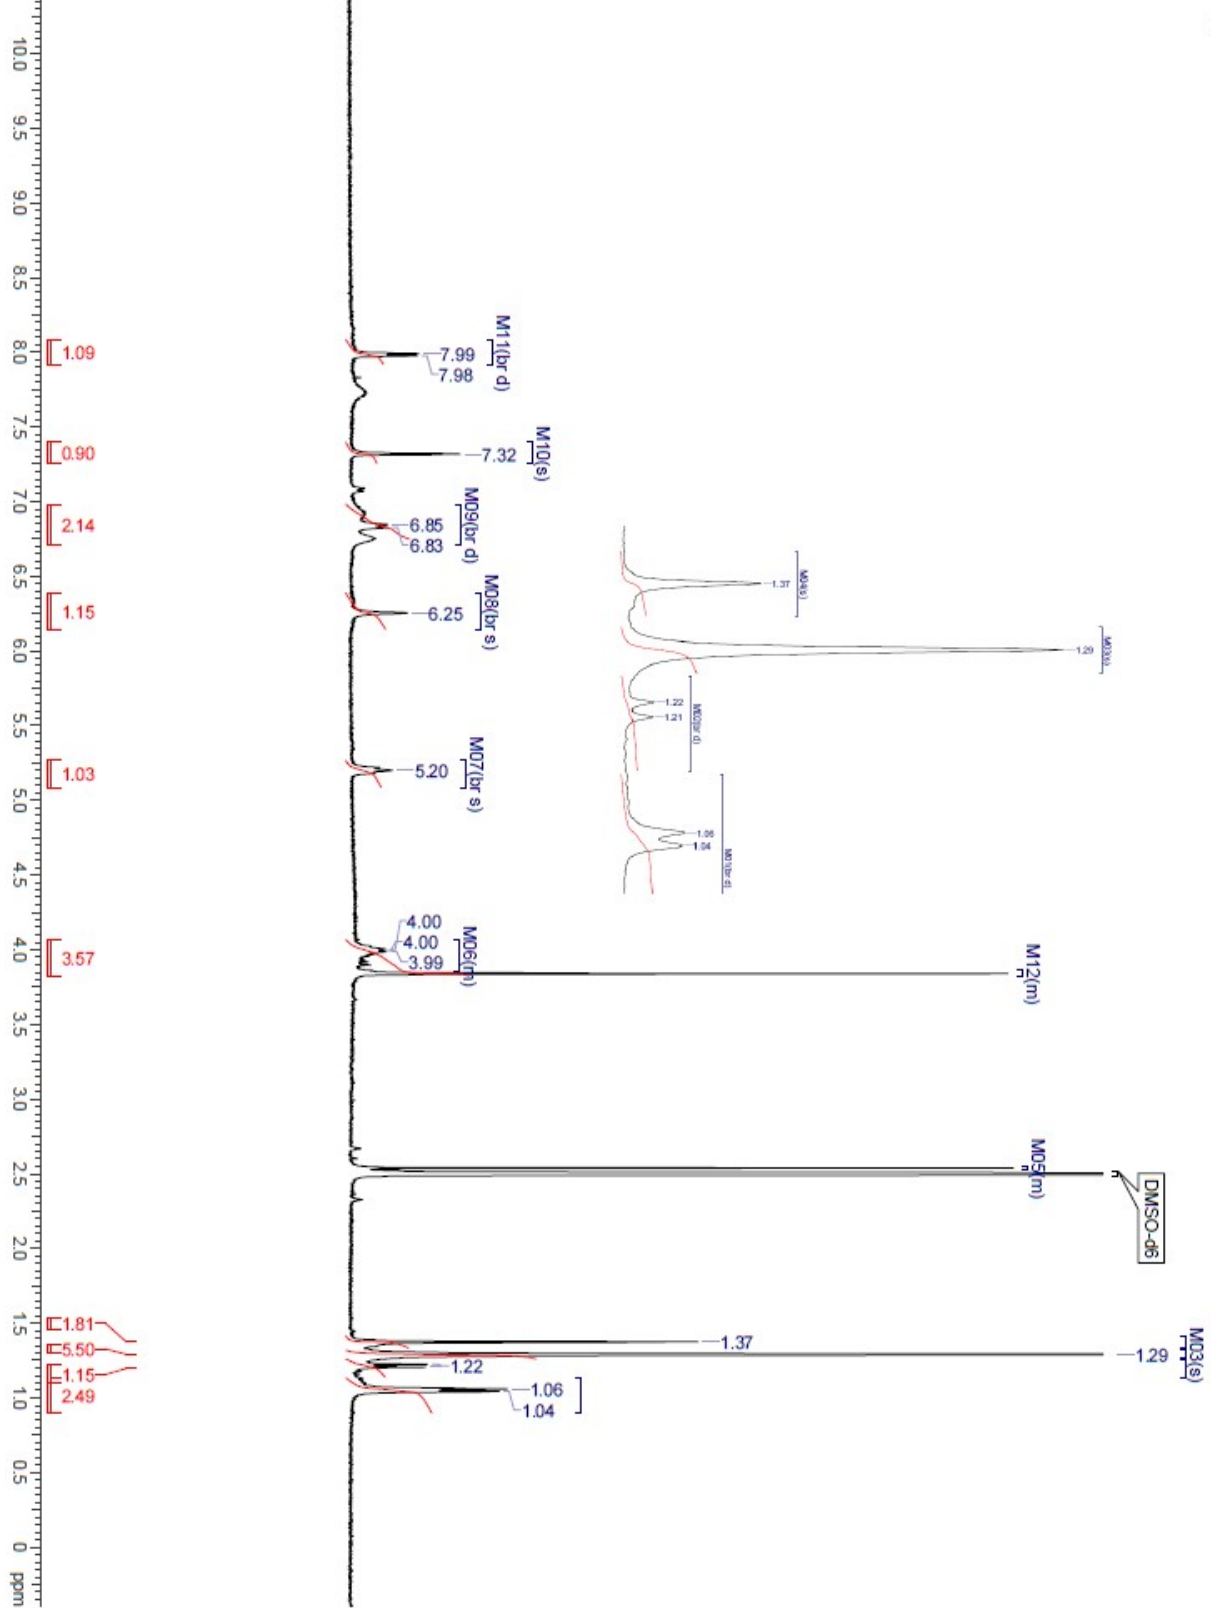

3p

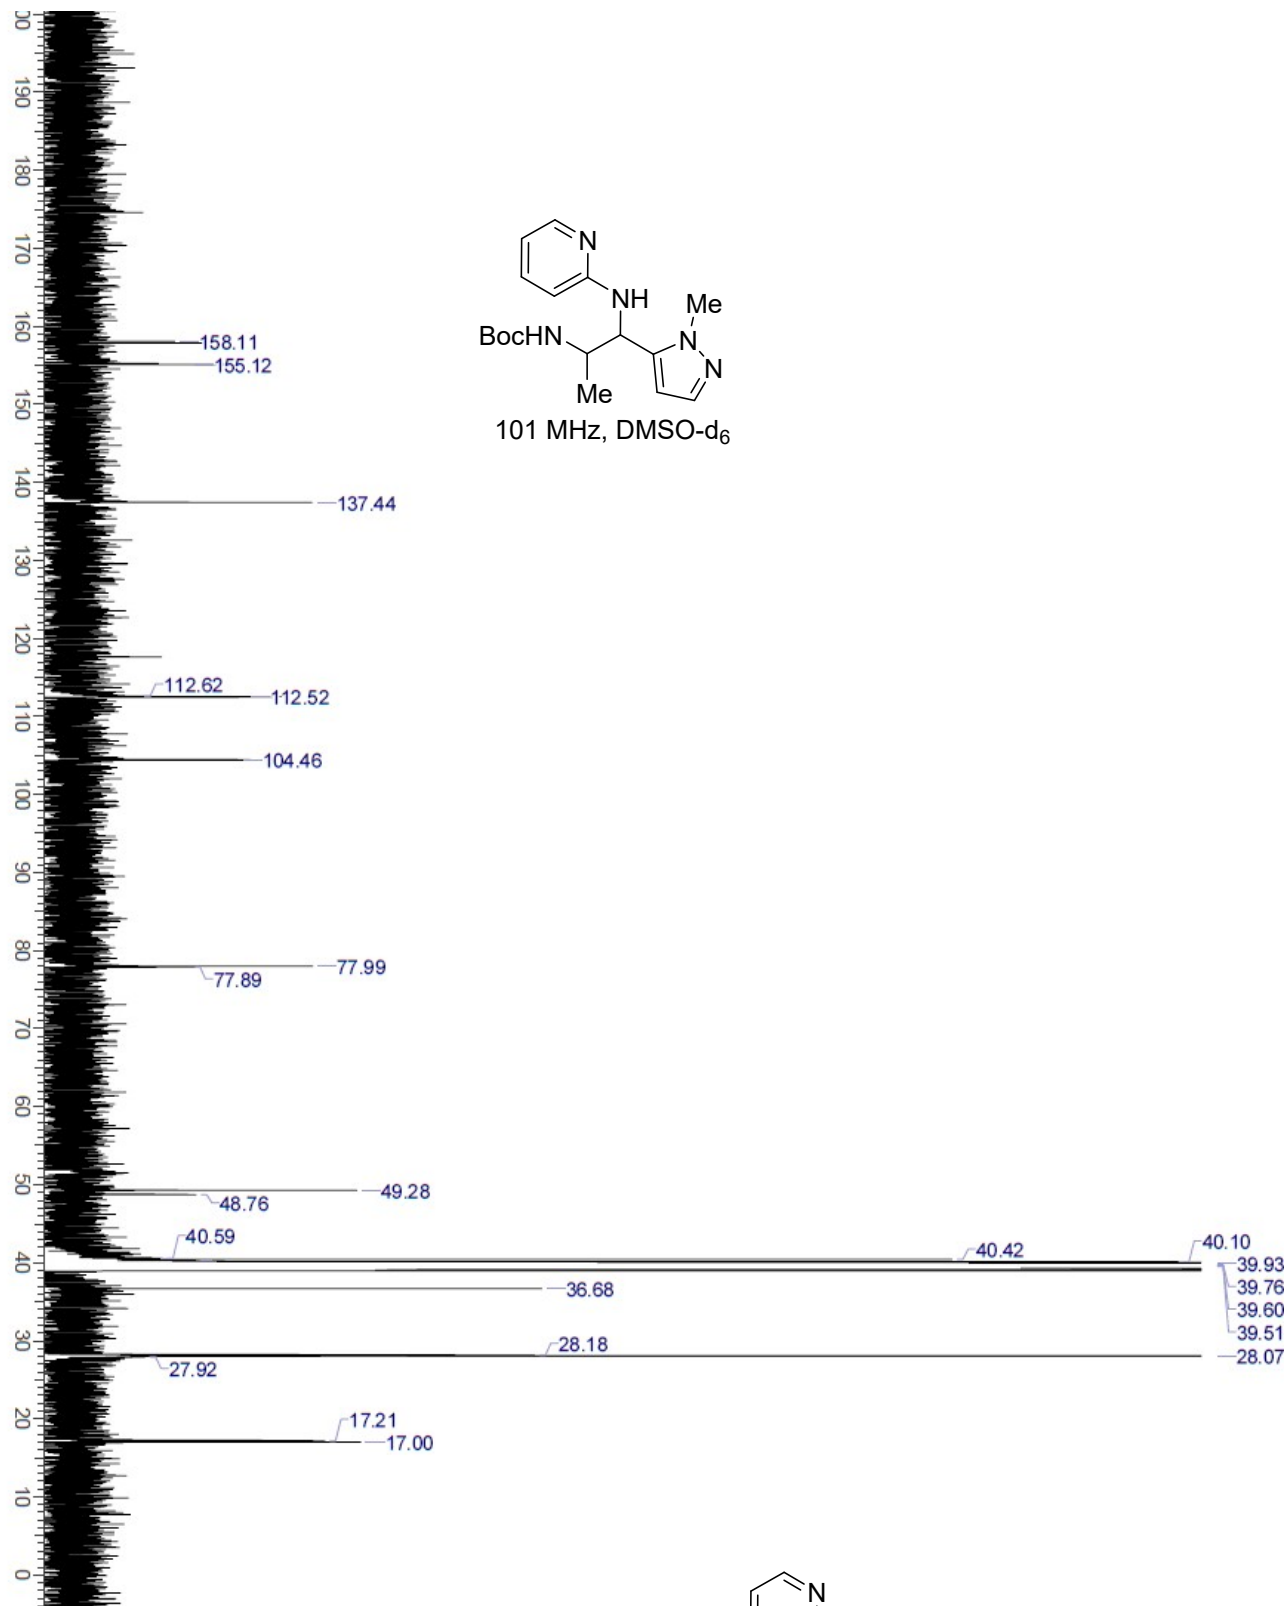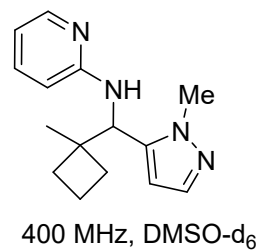

3r

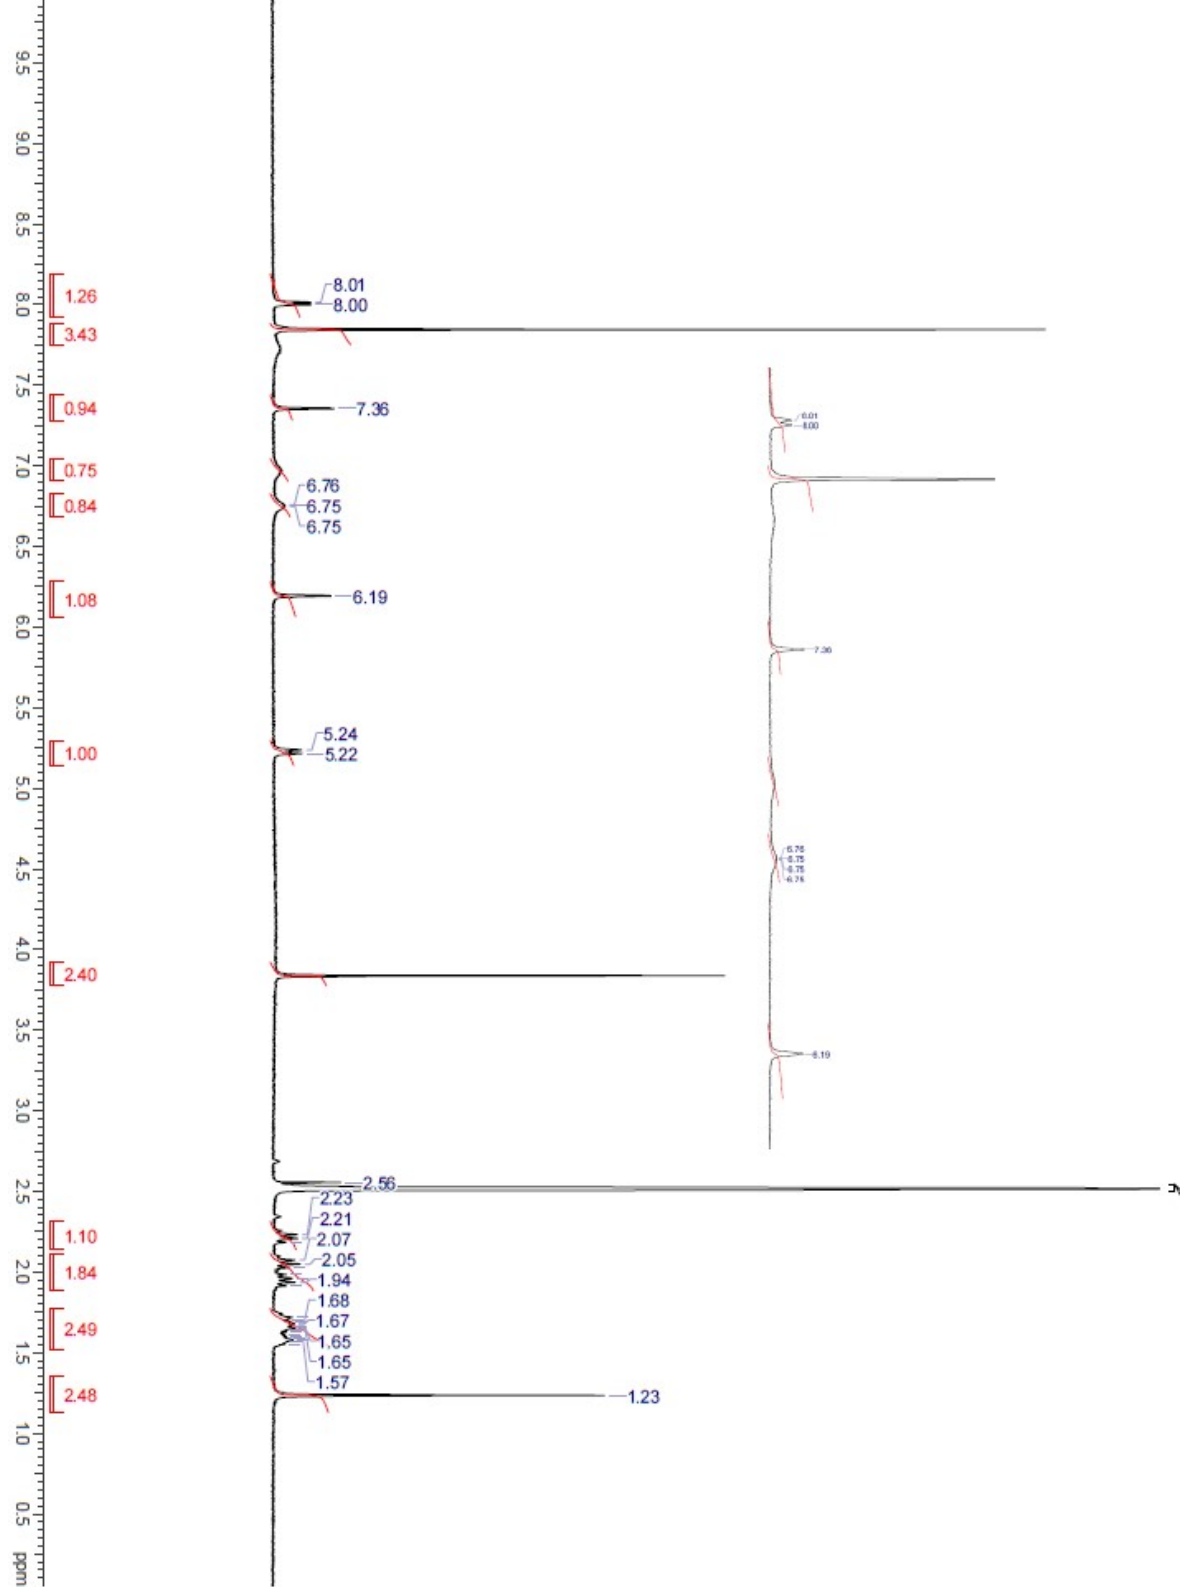

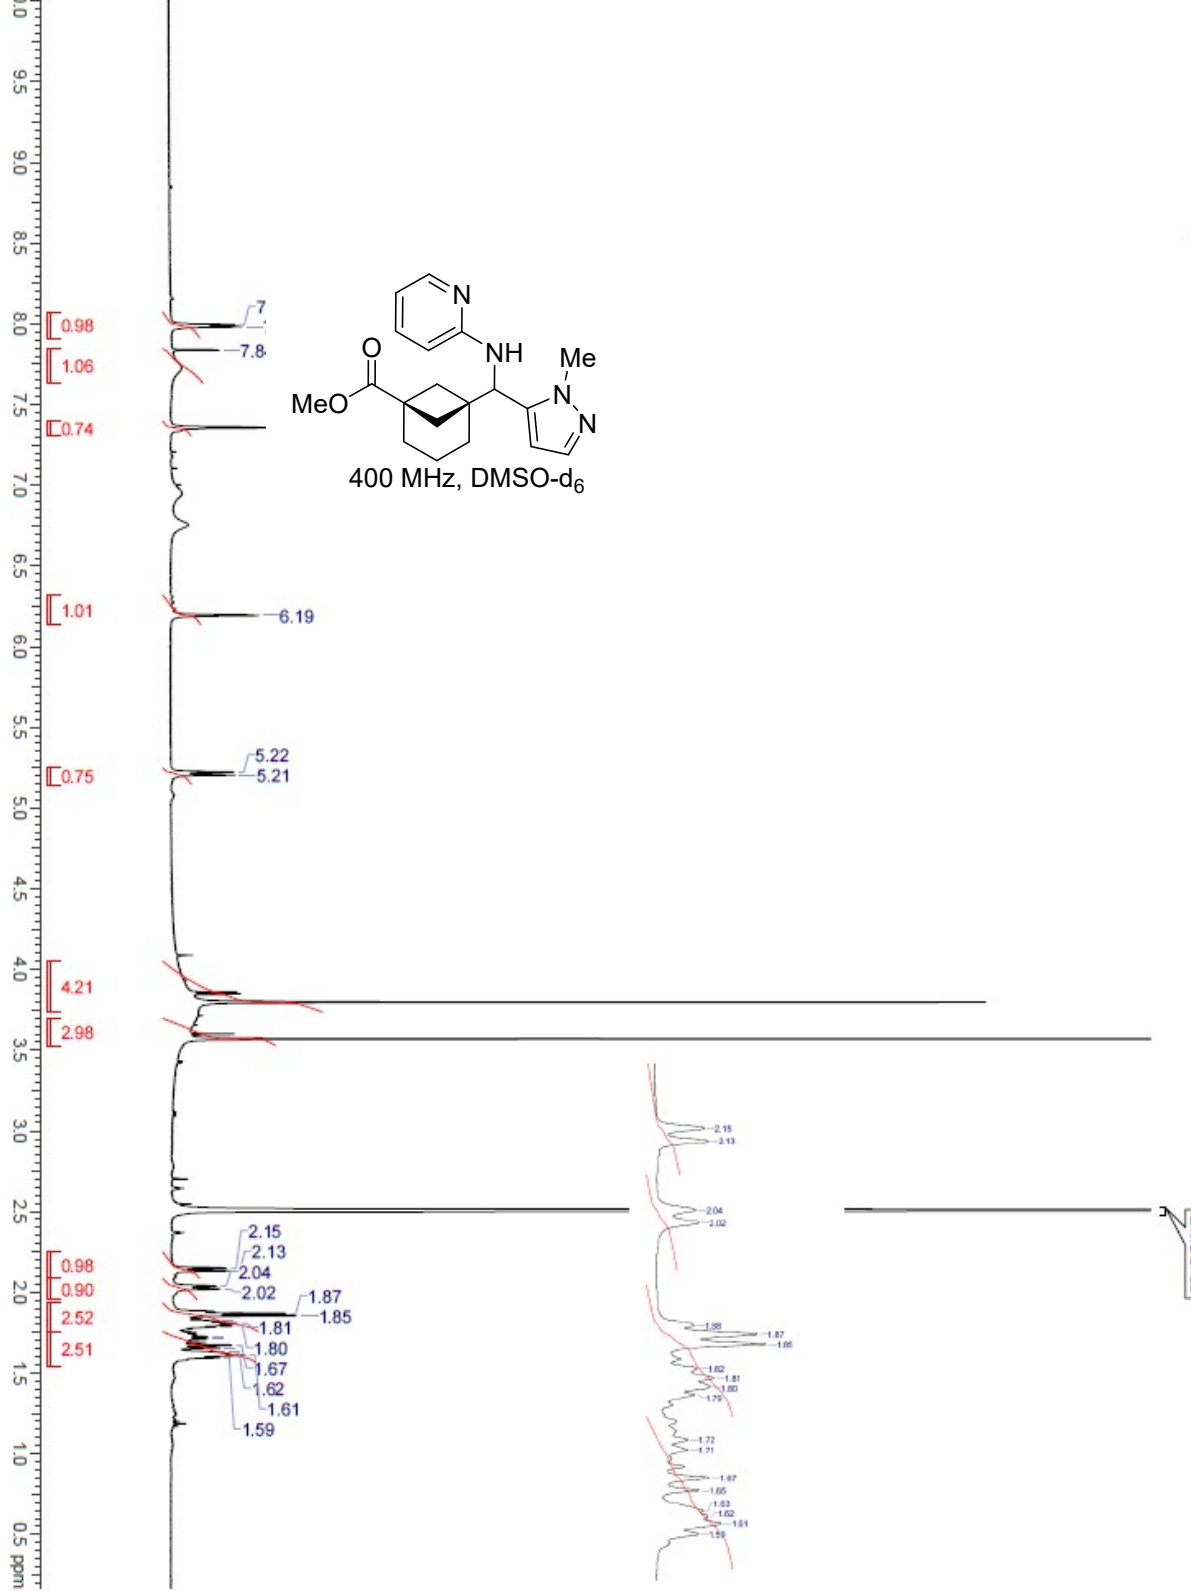

3u

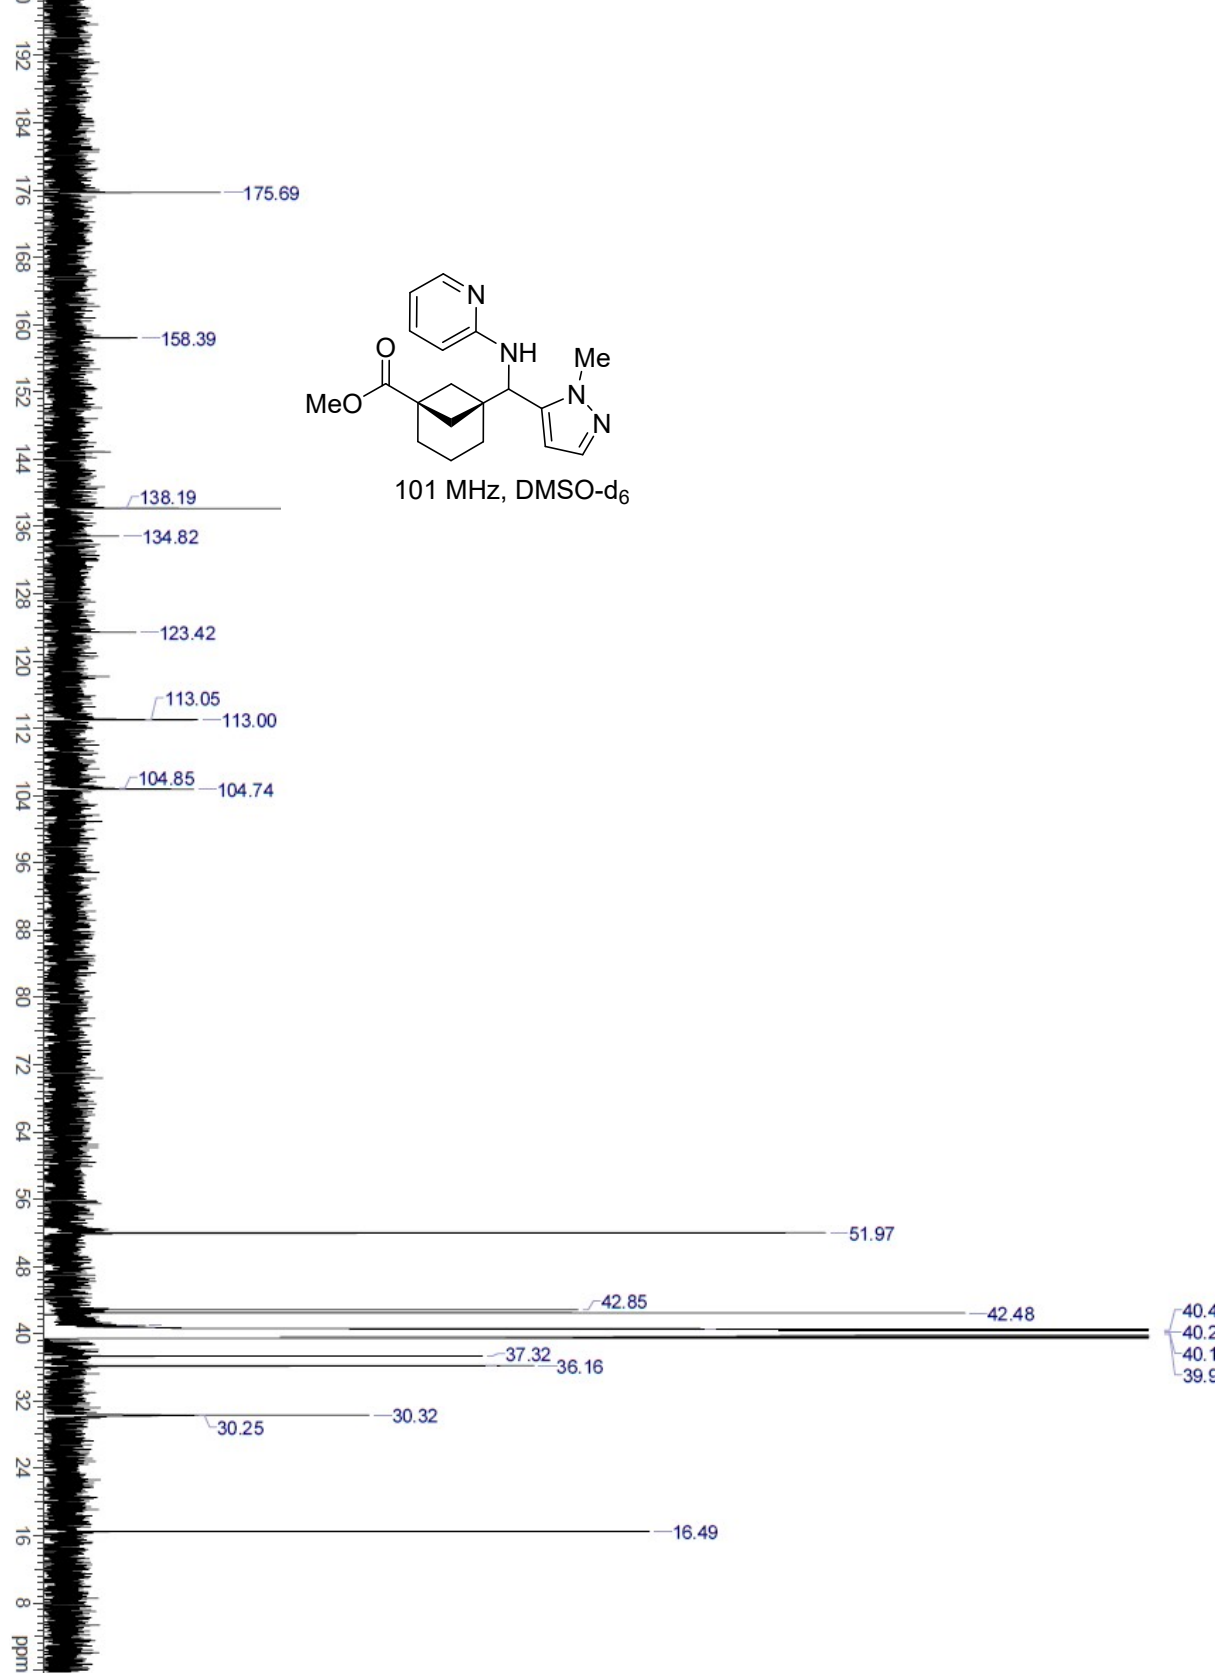

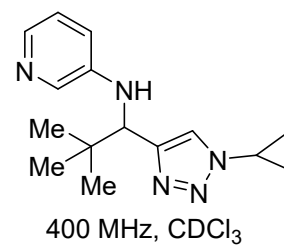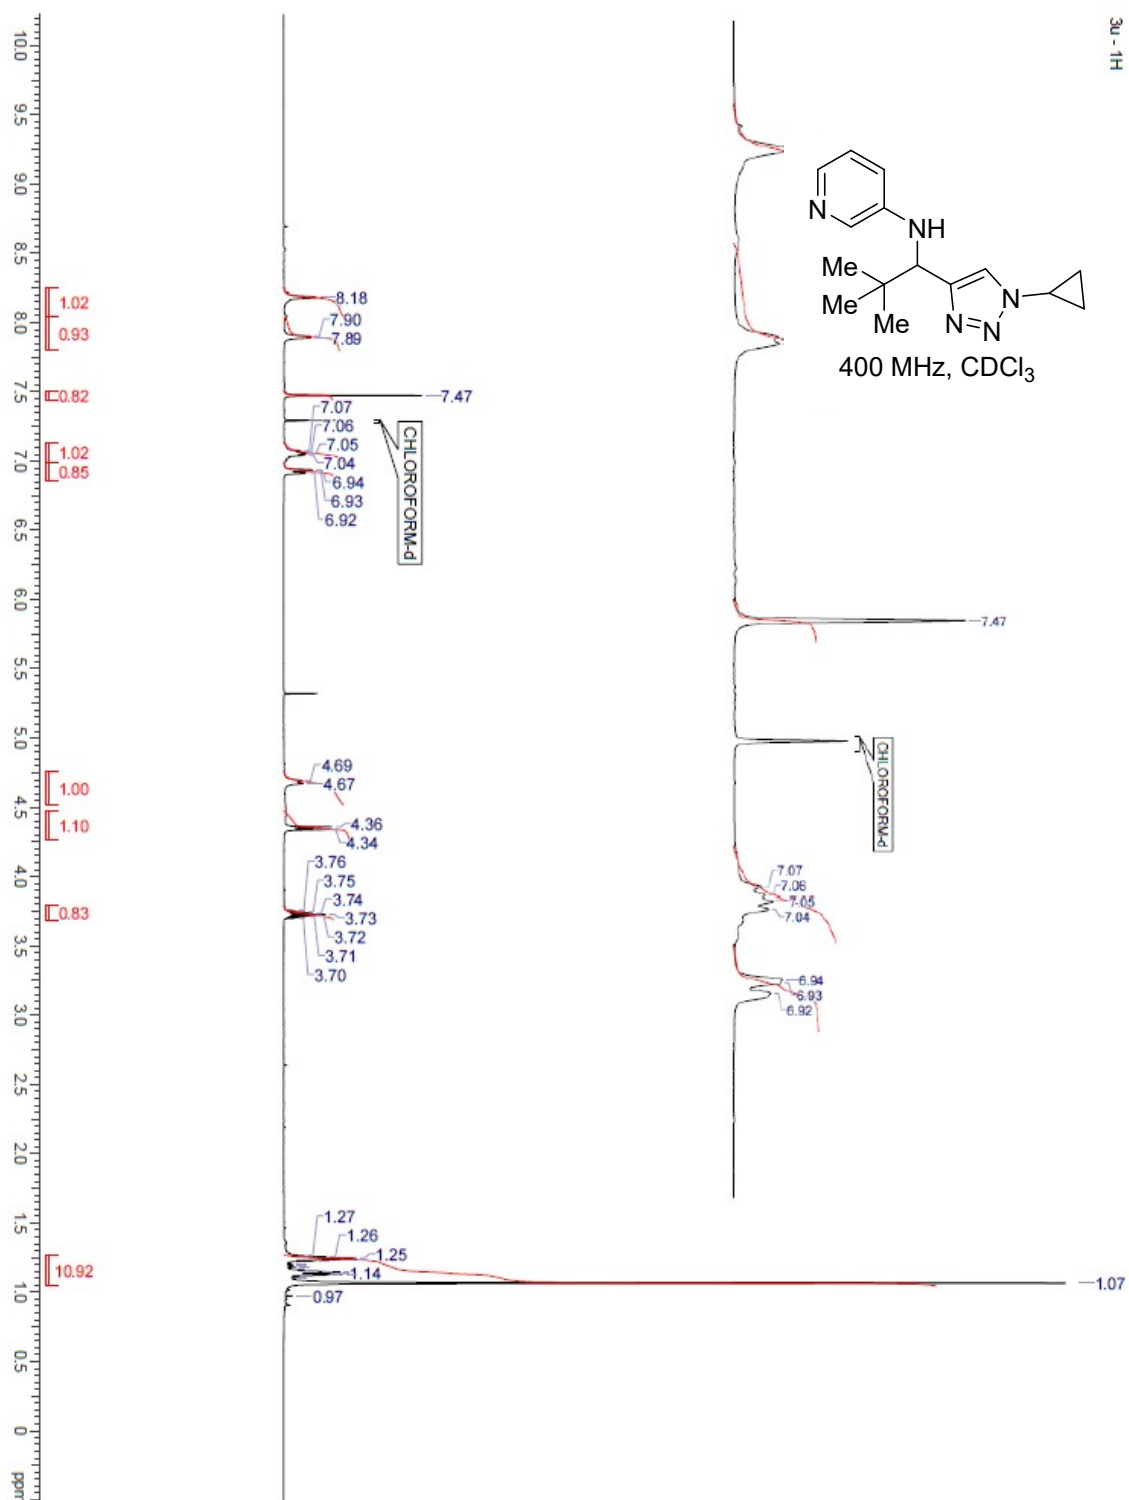

3u

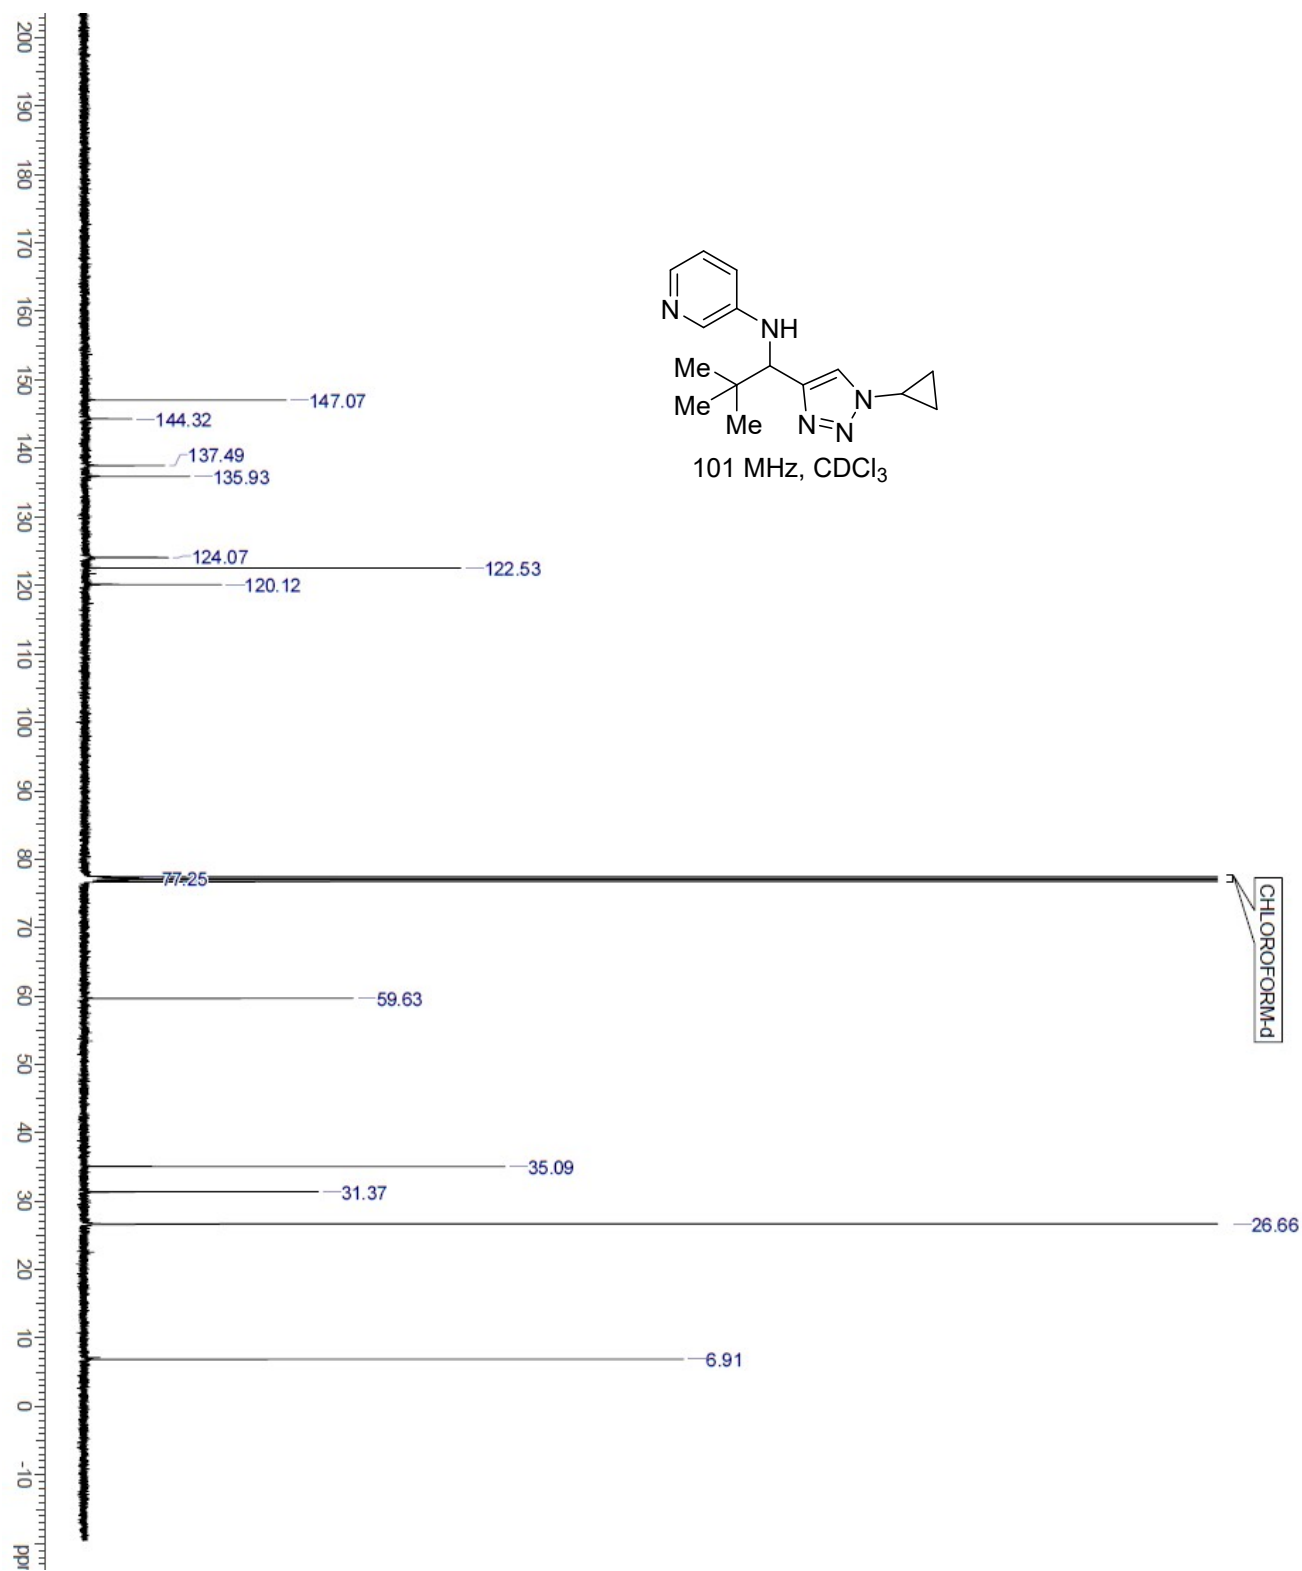

3v

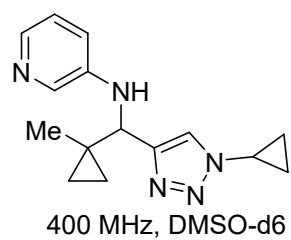

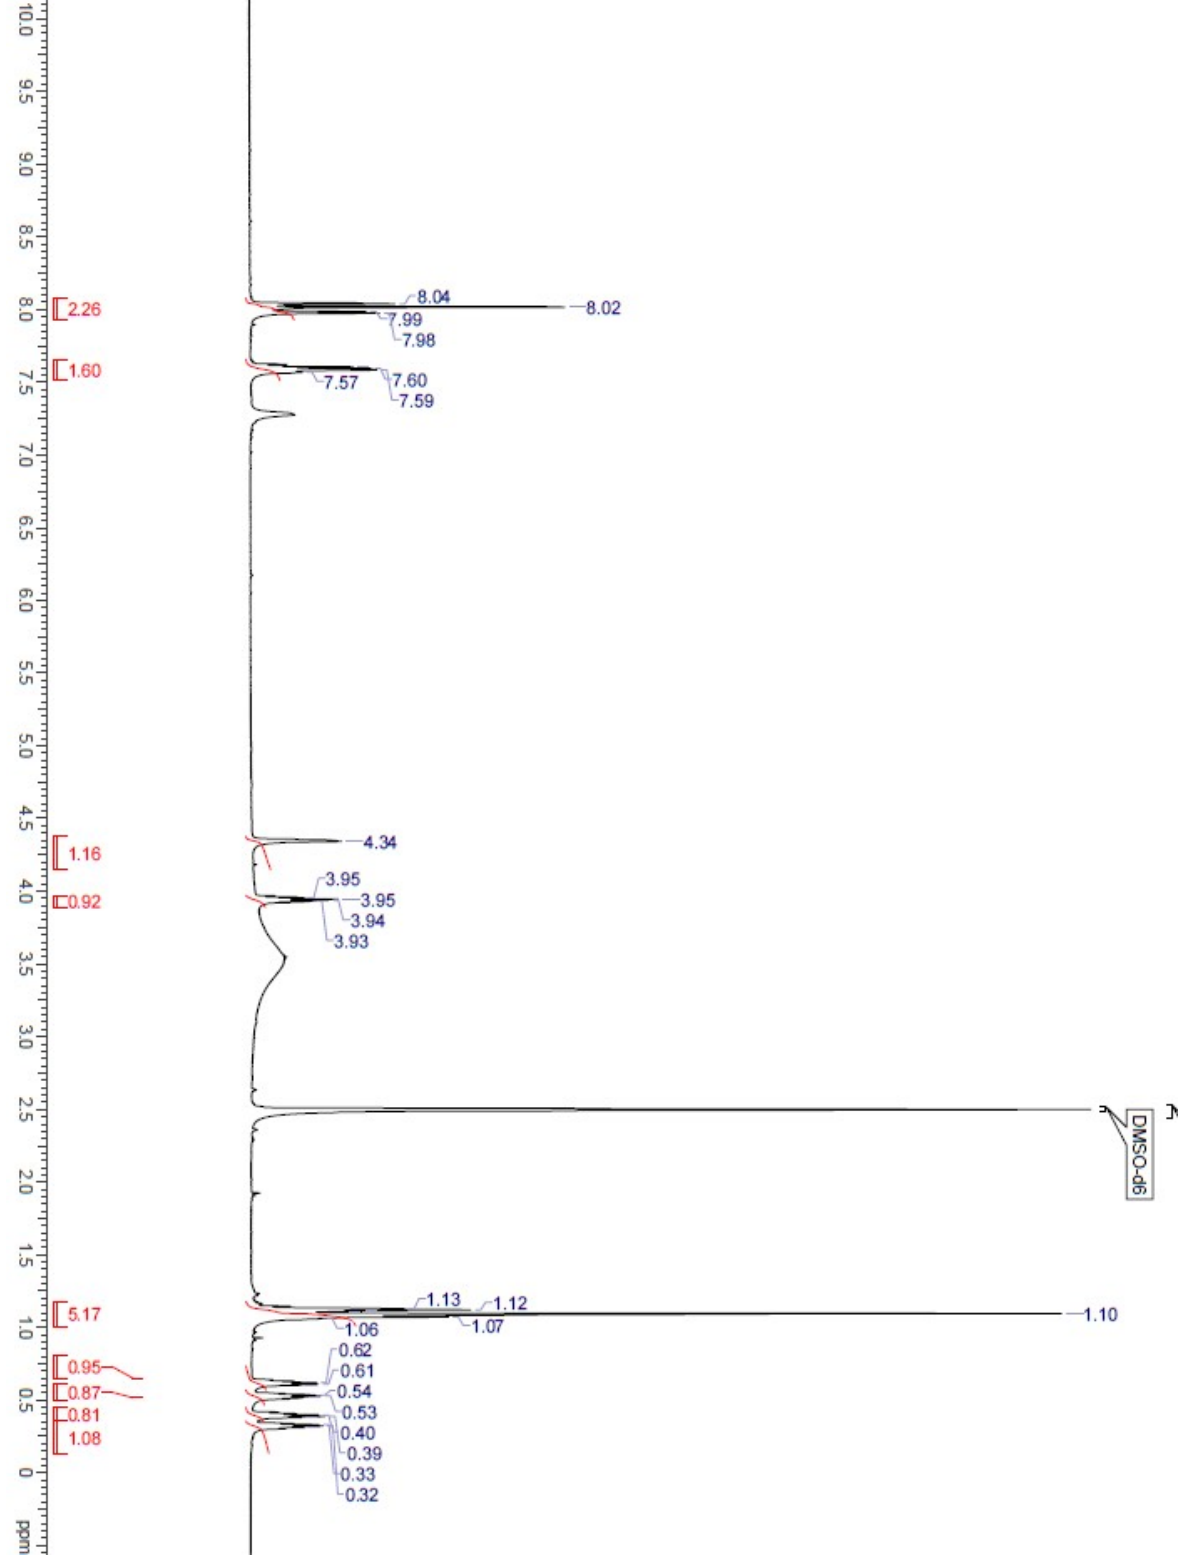

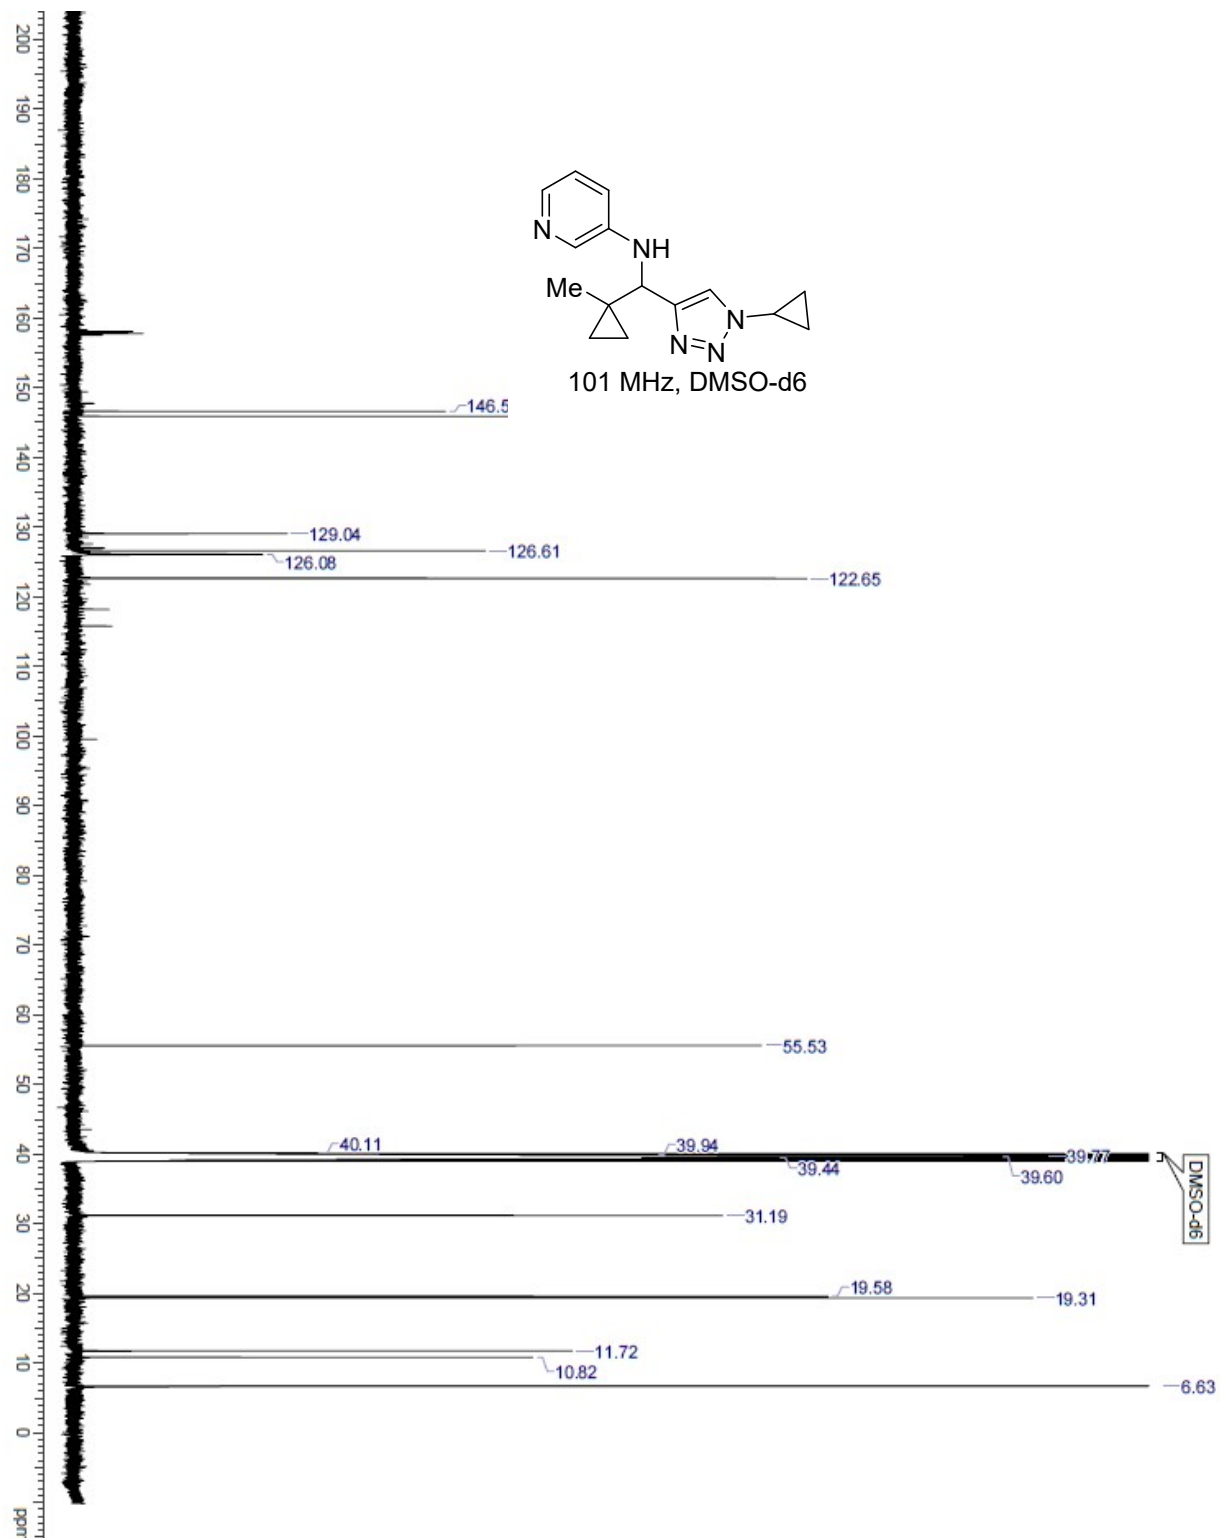

3w

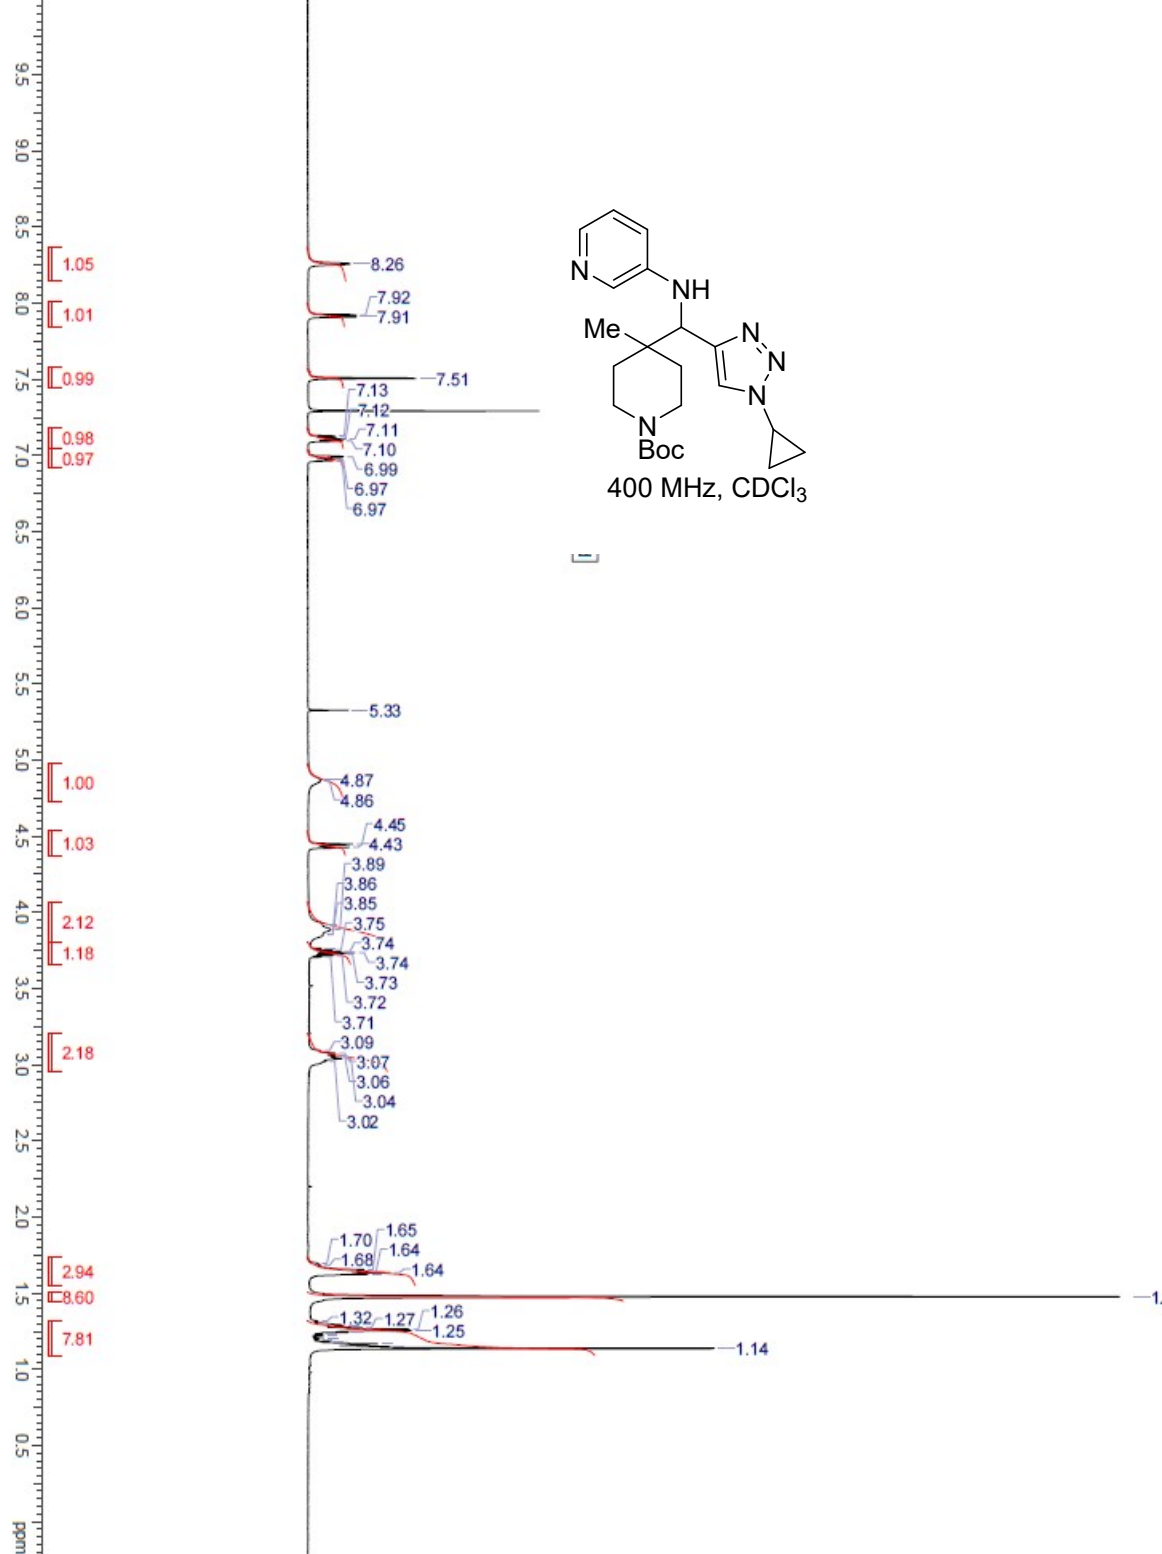

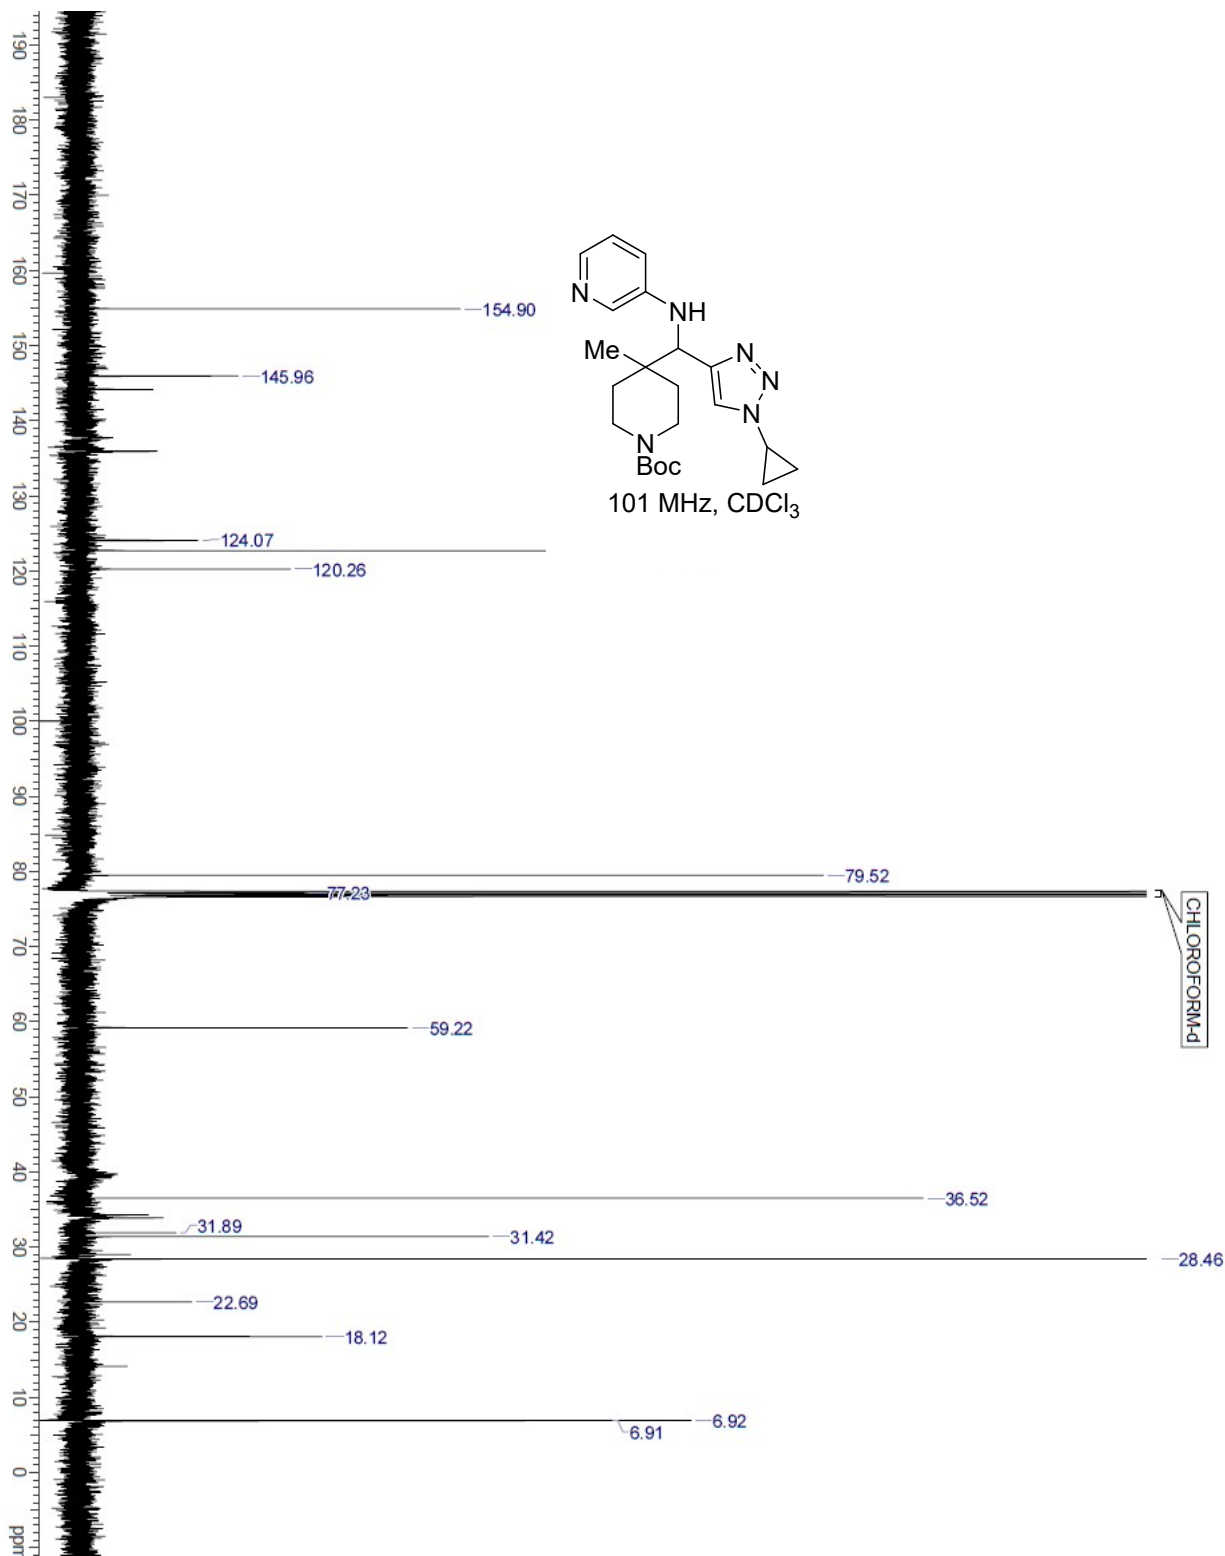

3x

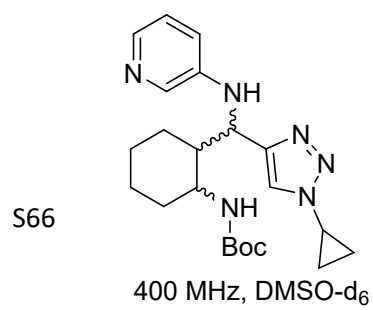

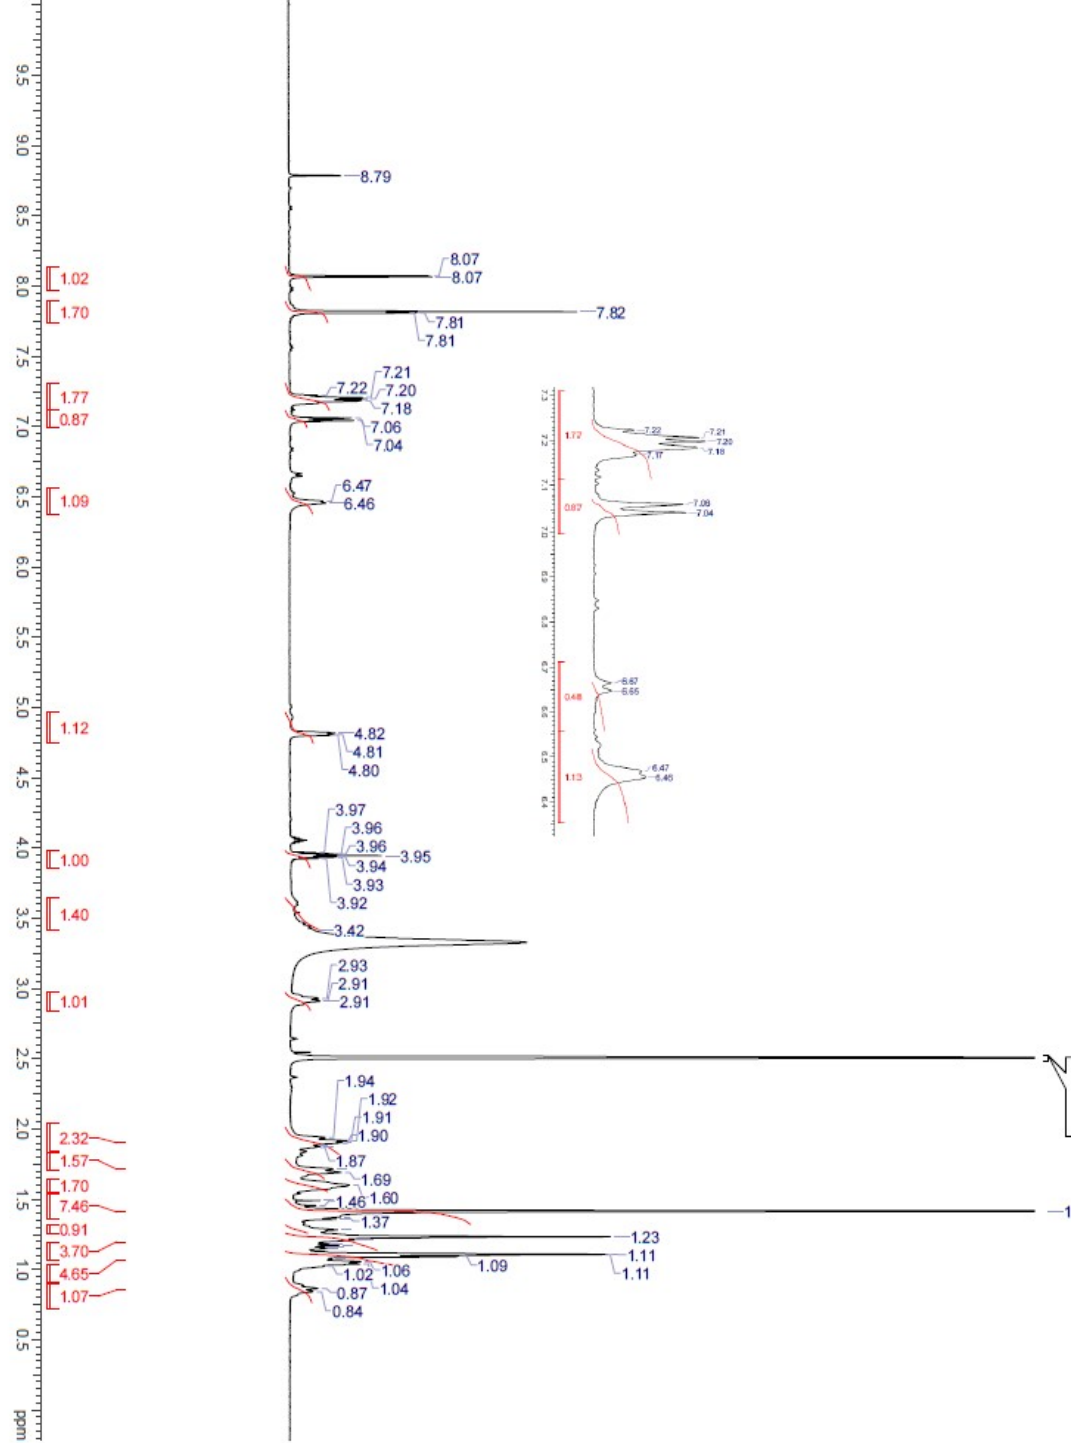

3y

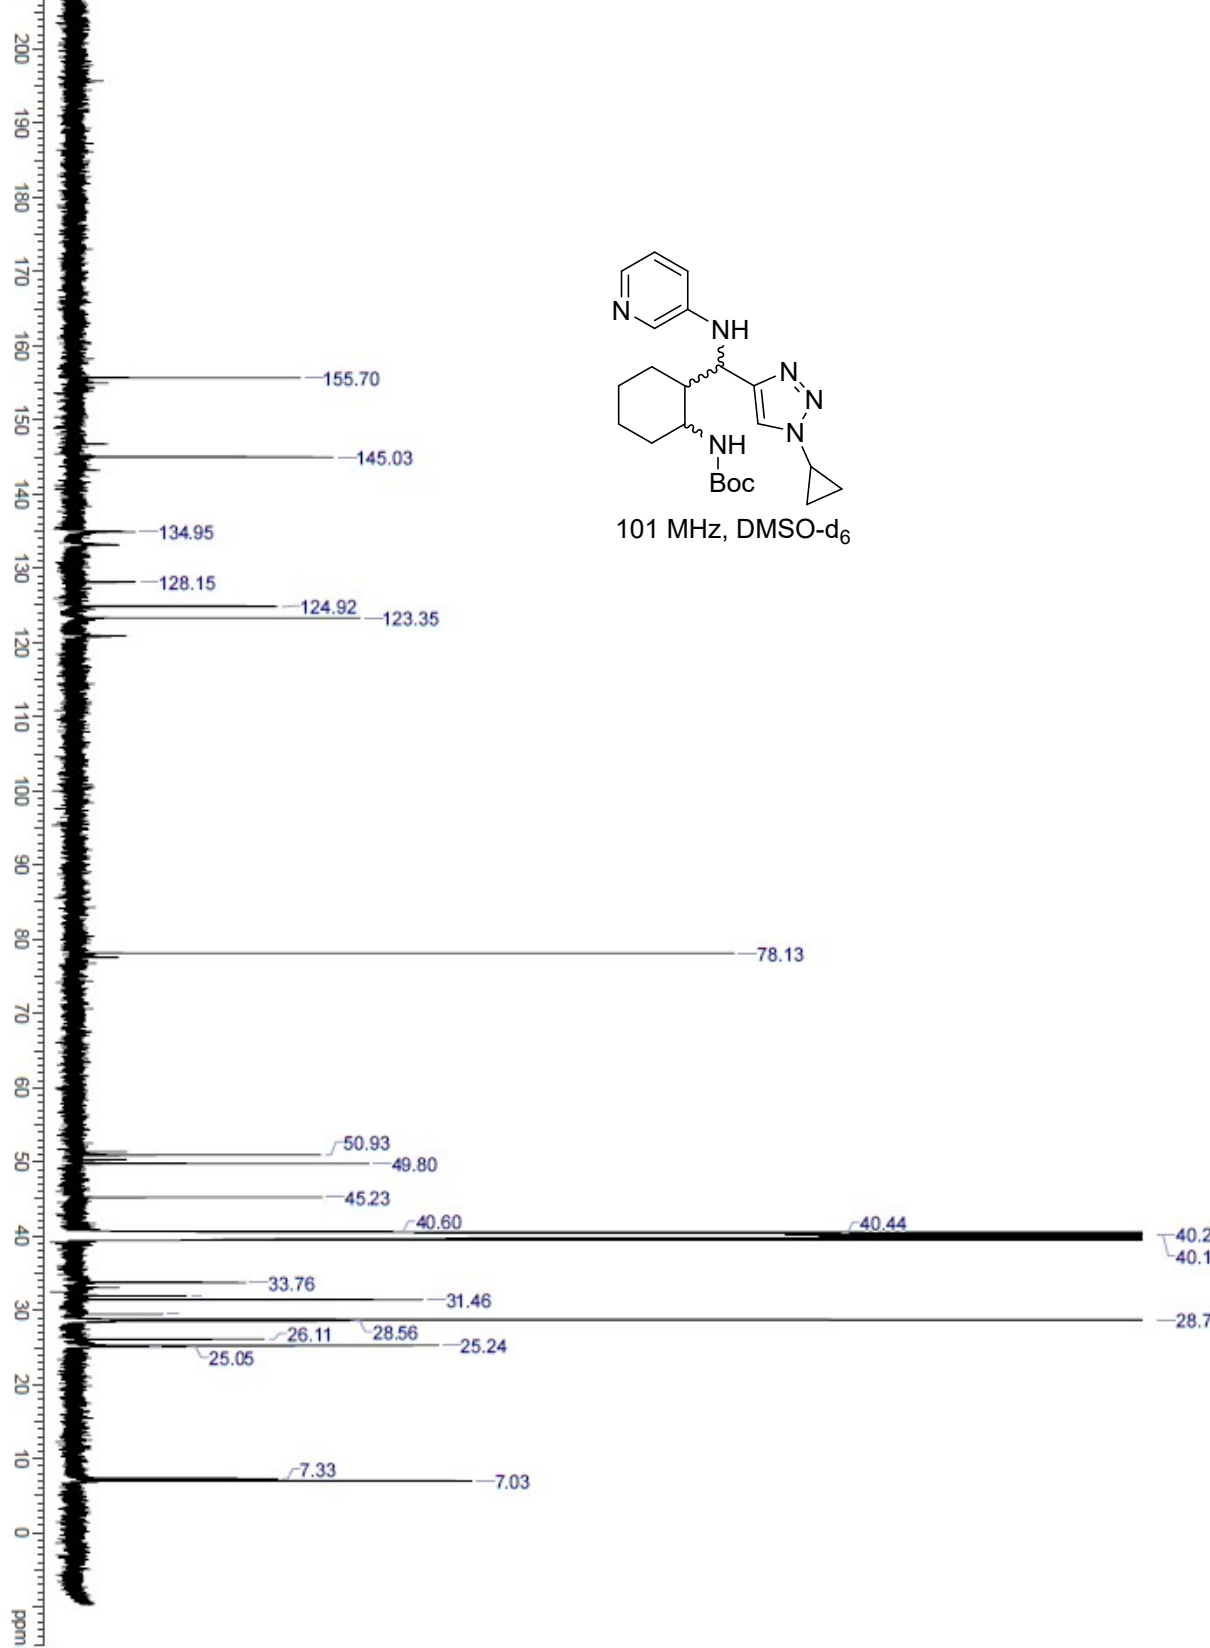

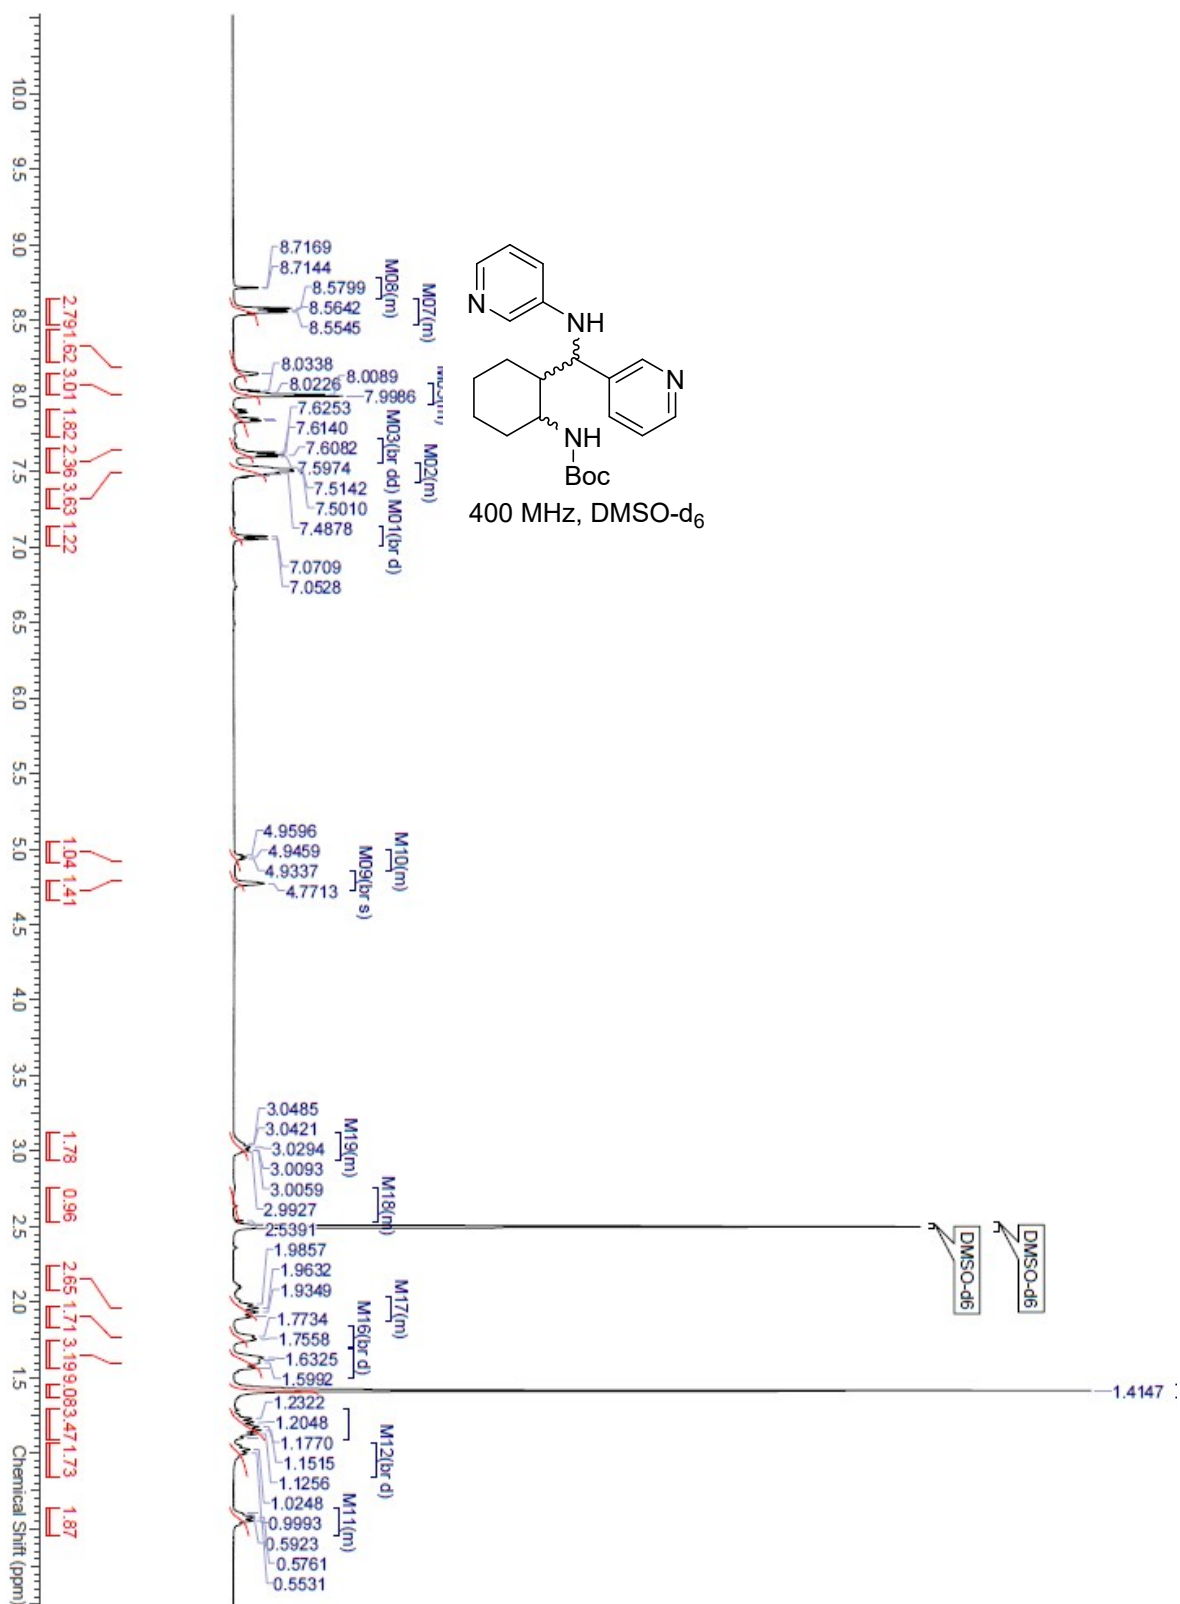

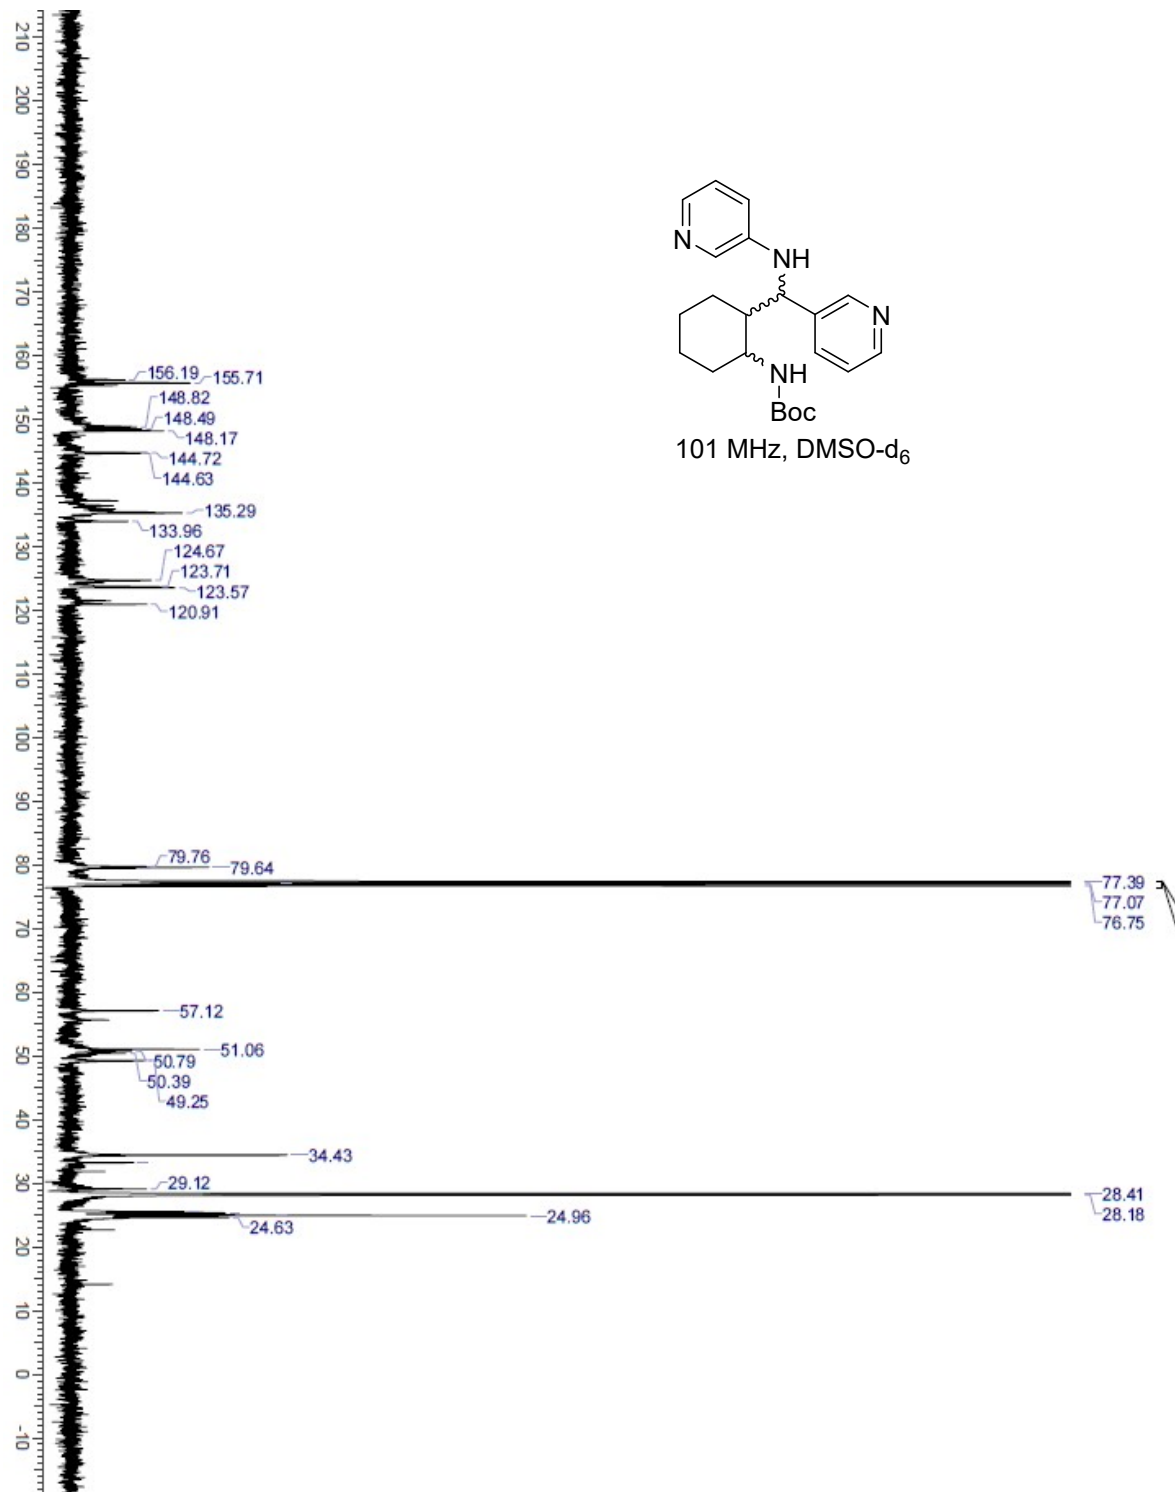

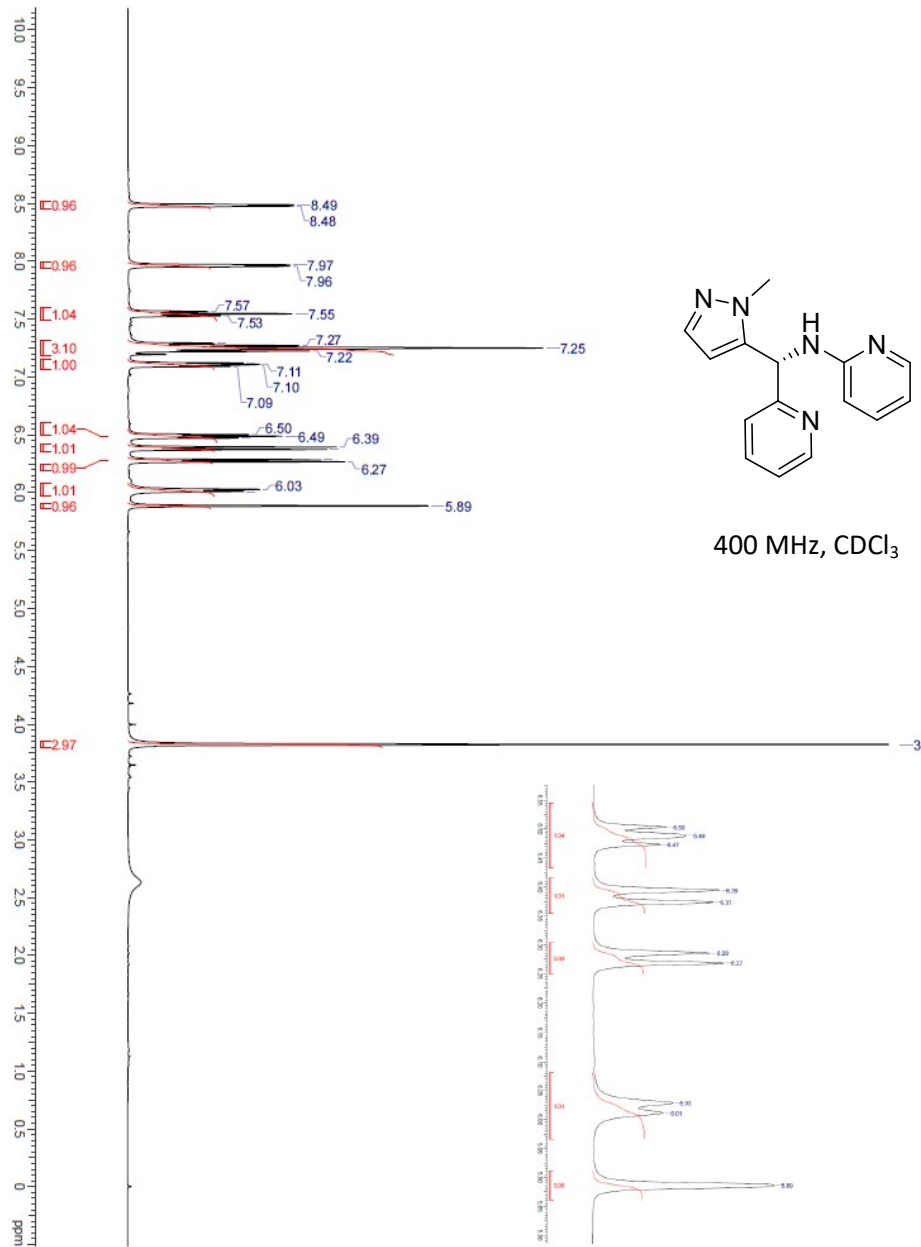

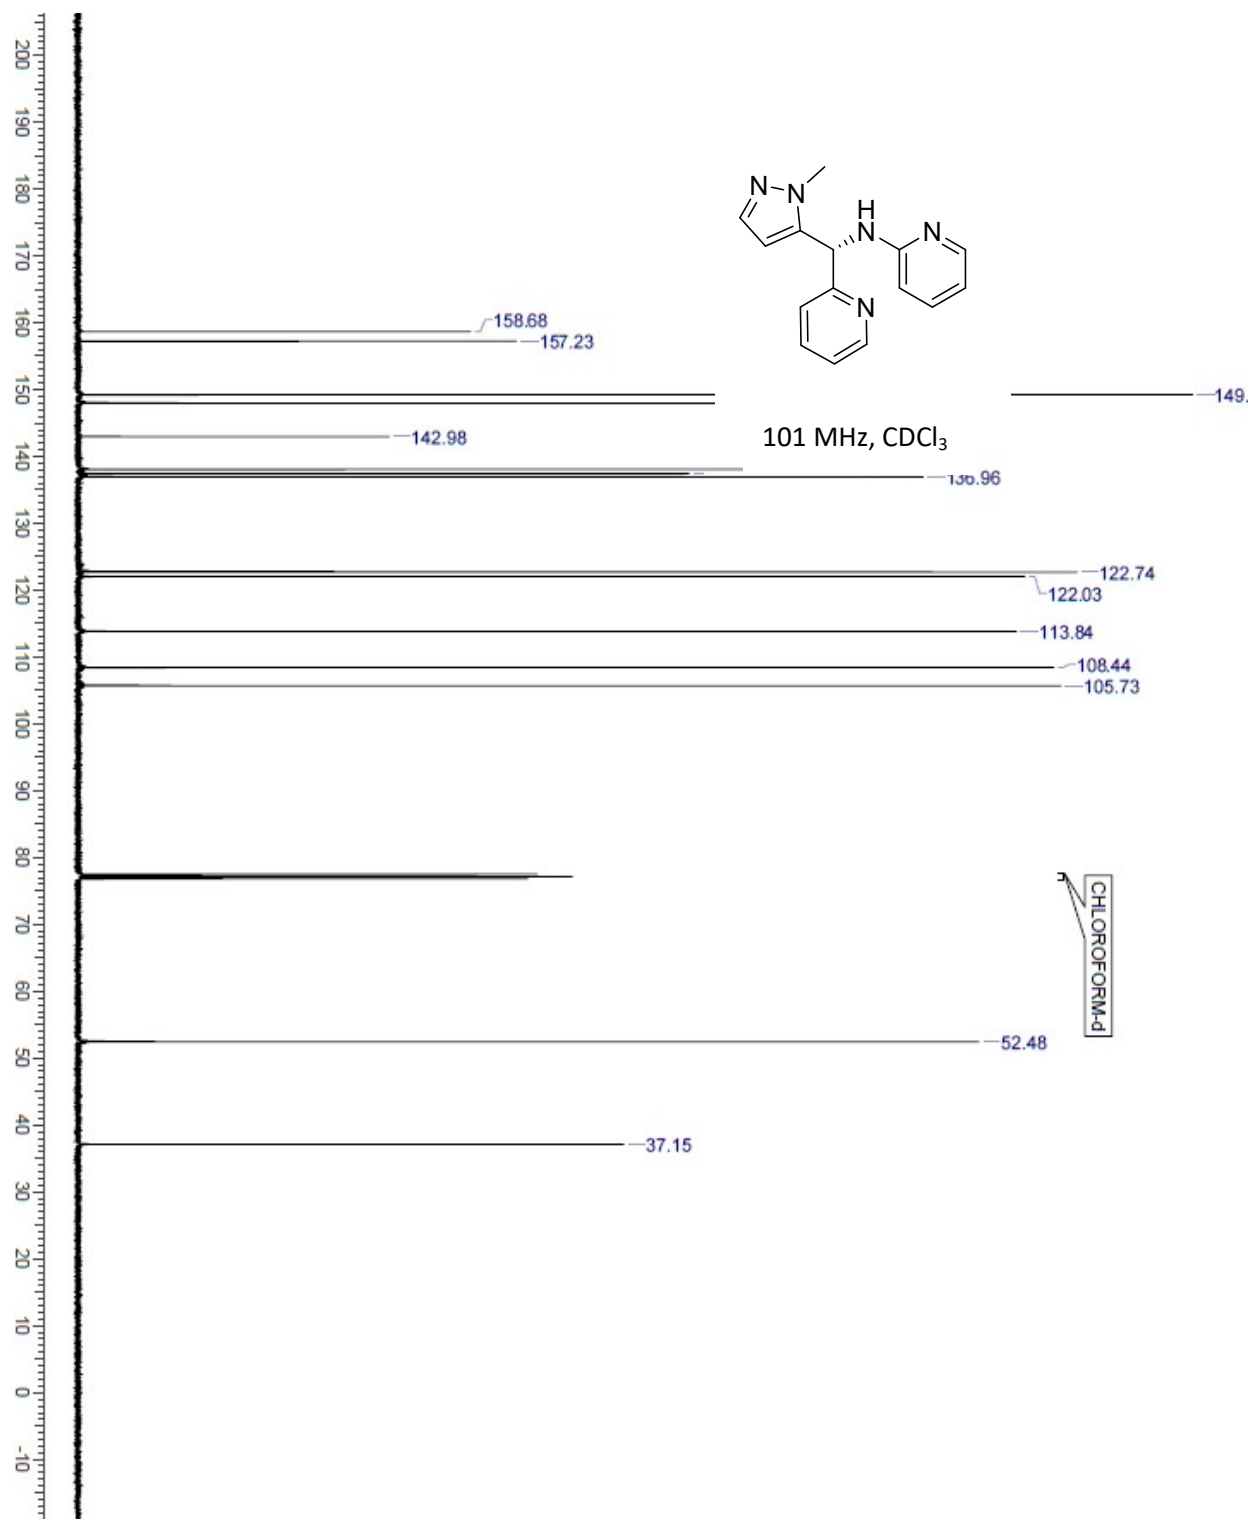

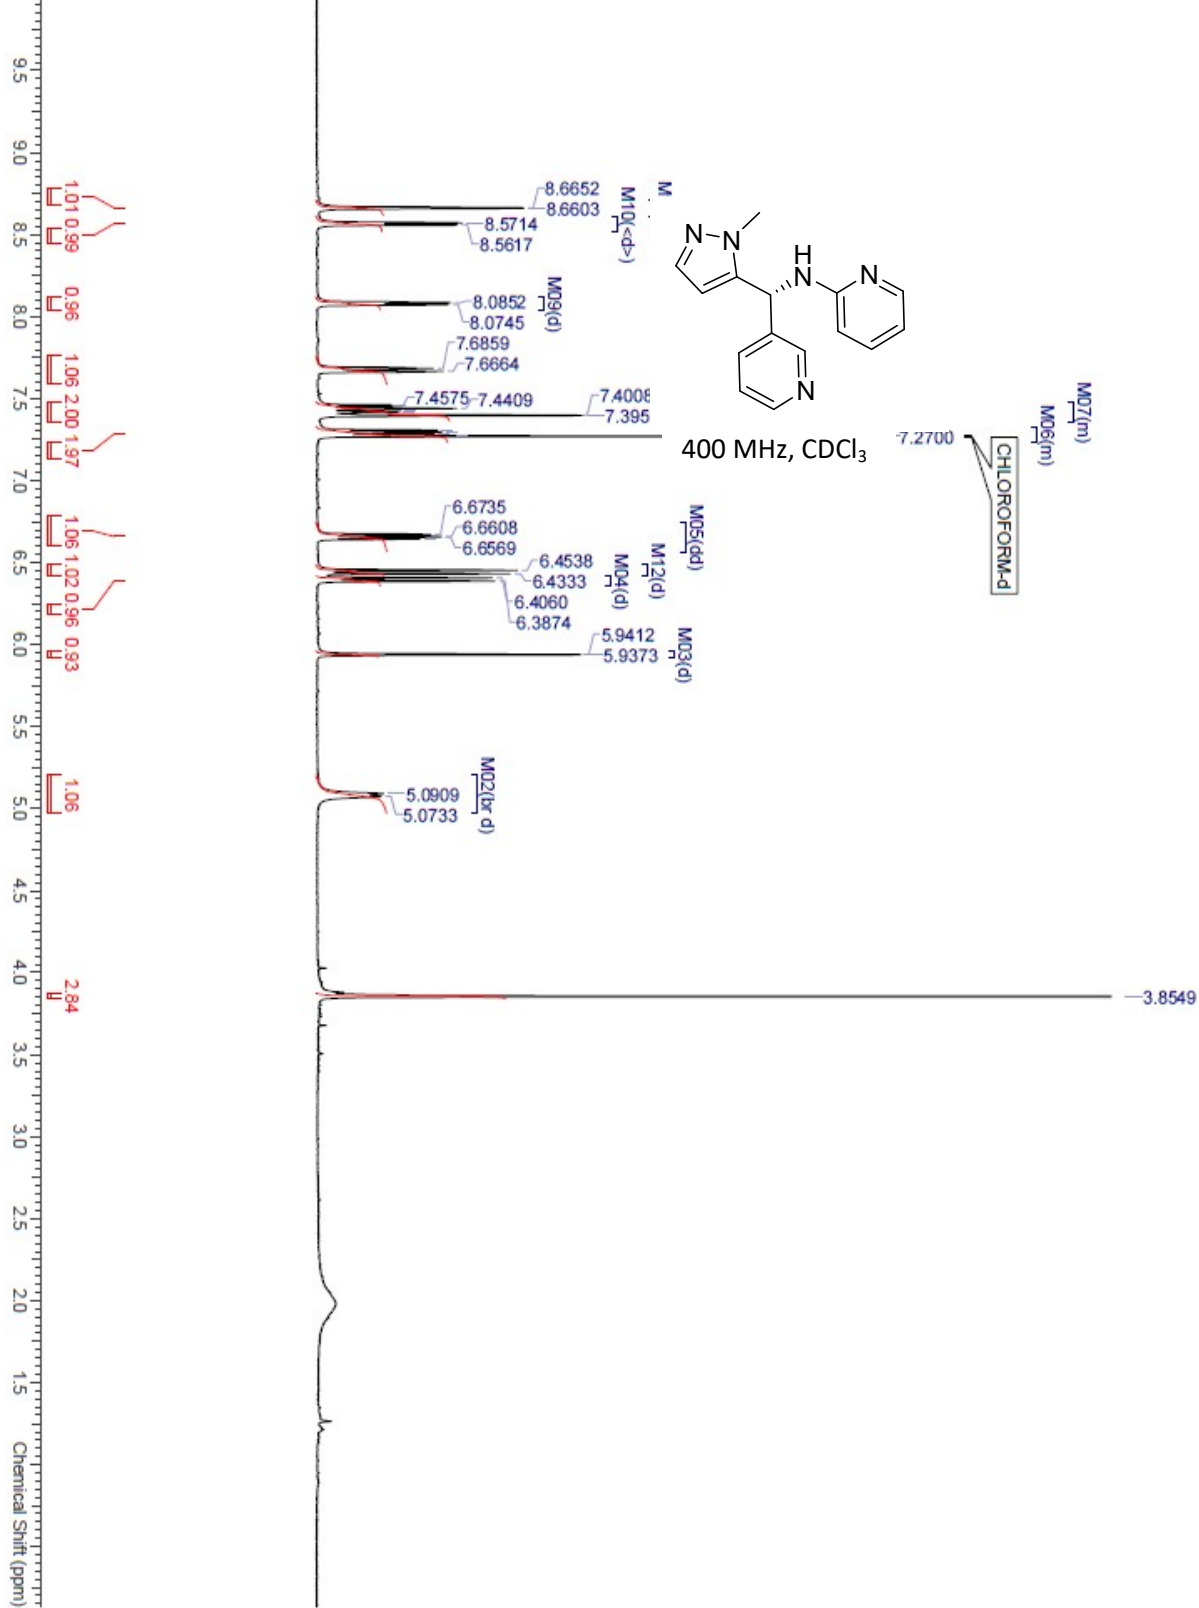

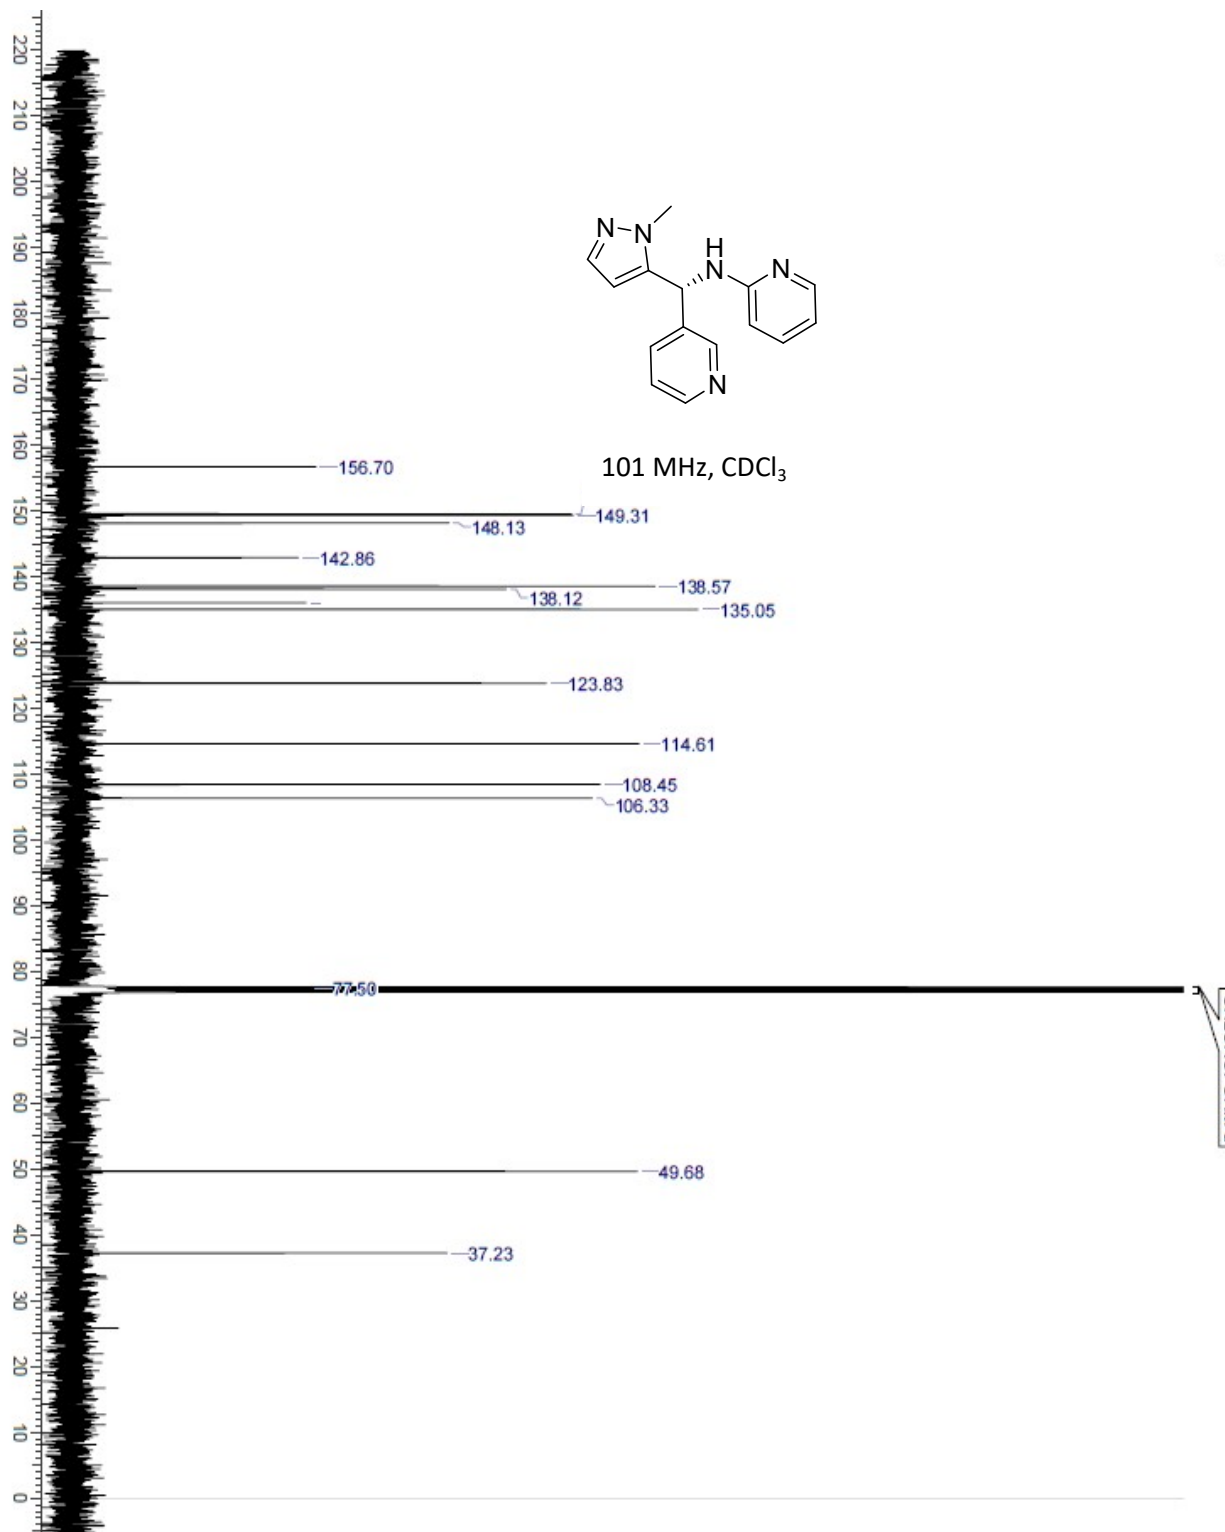

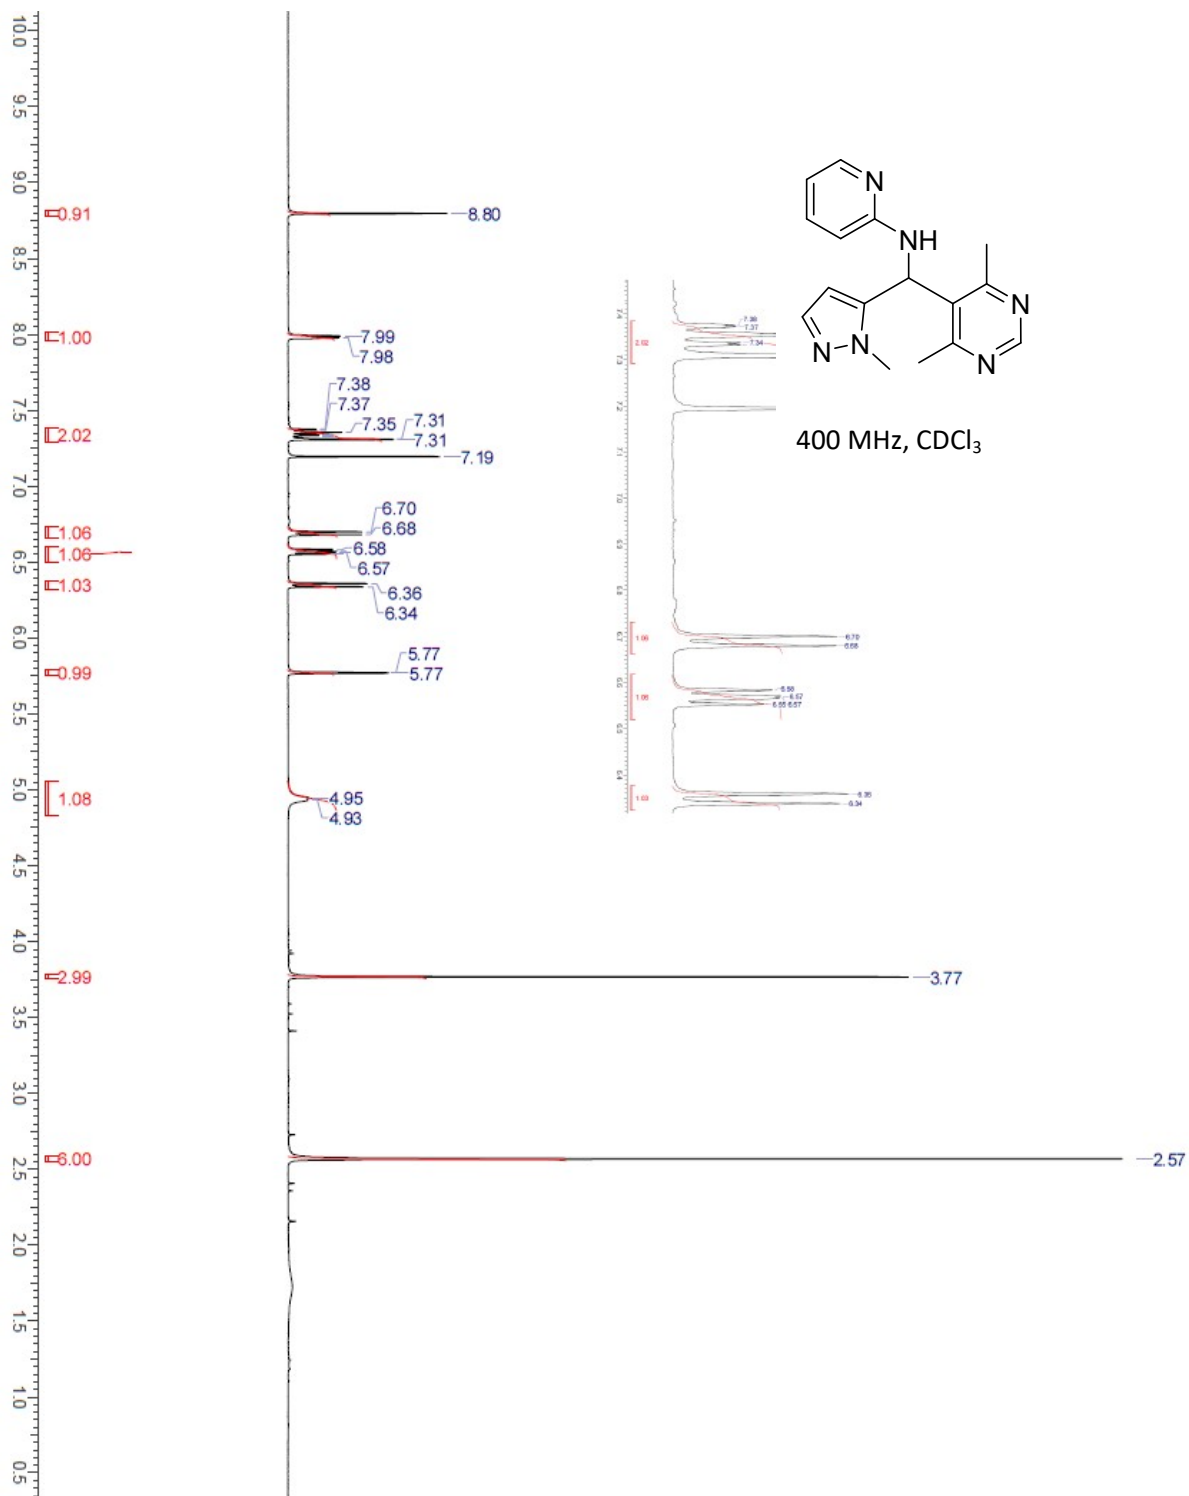

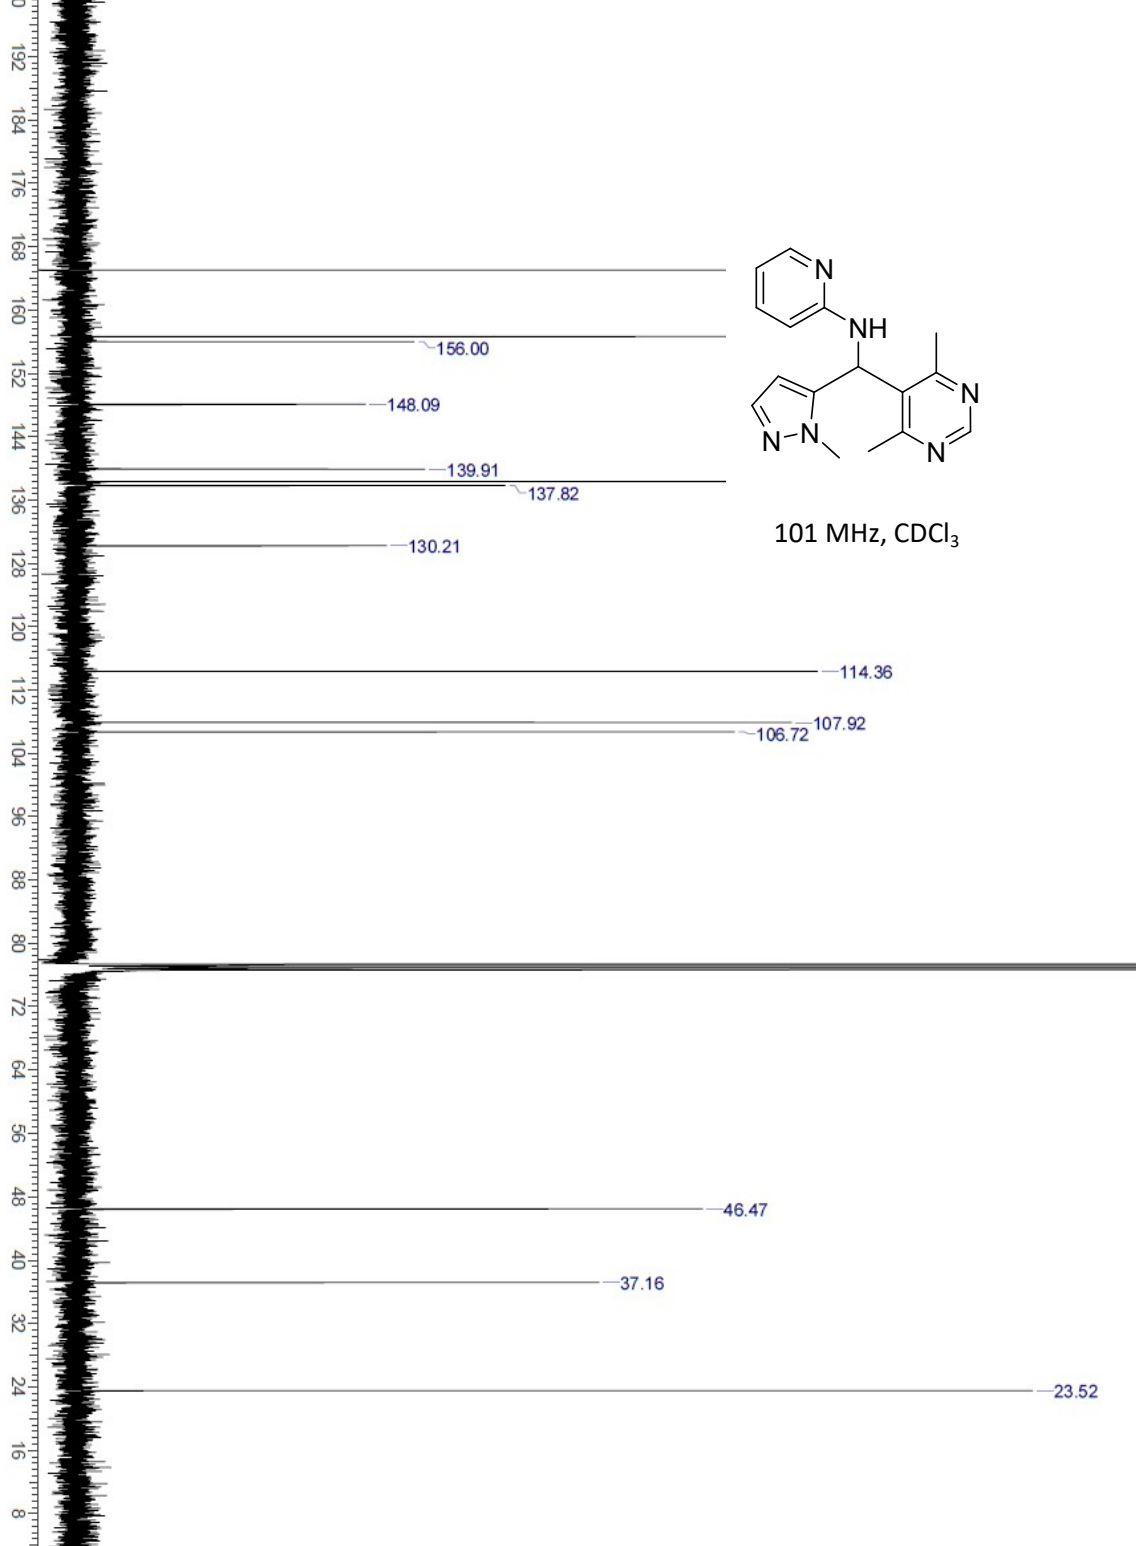

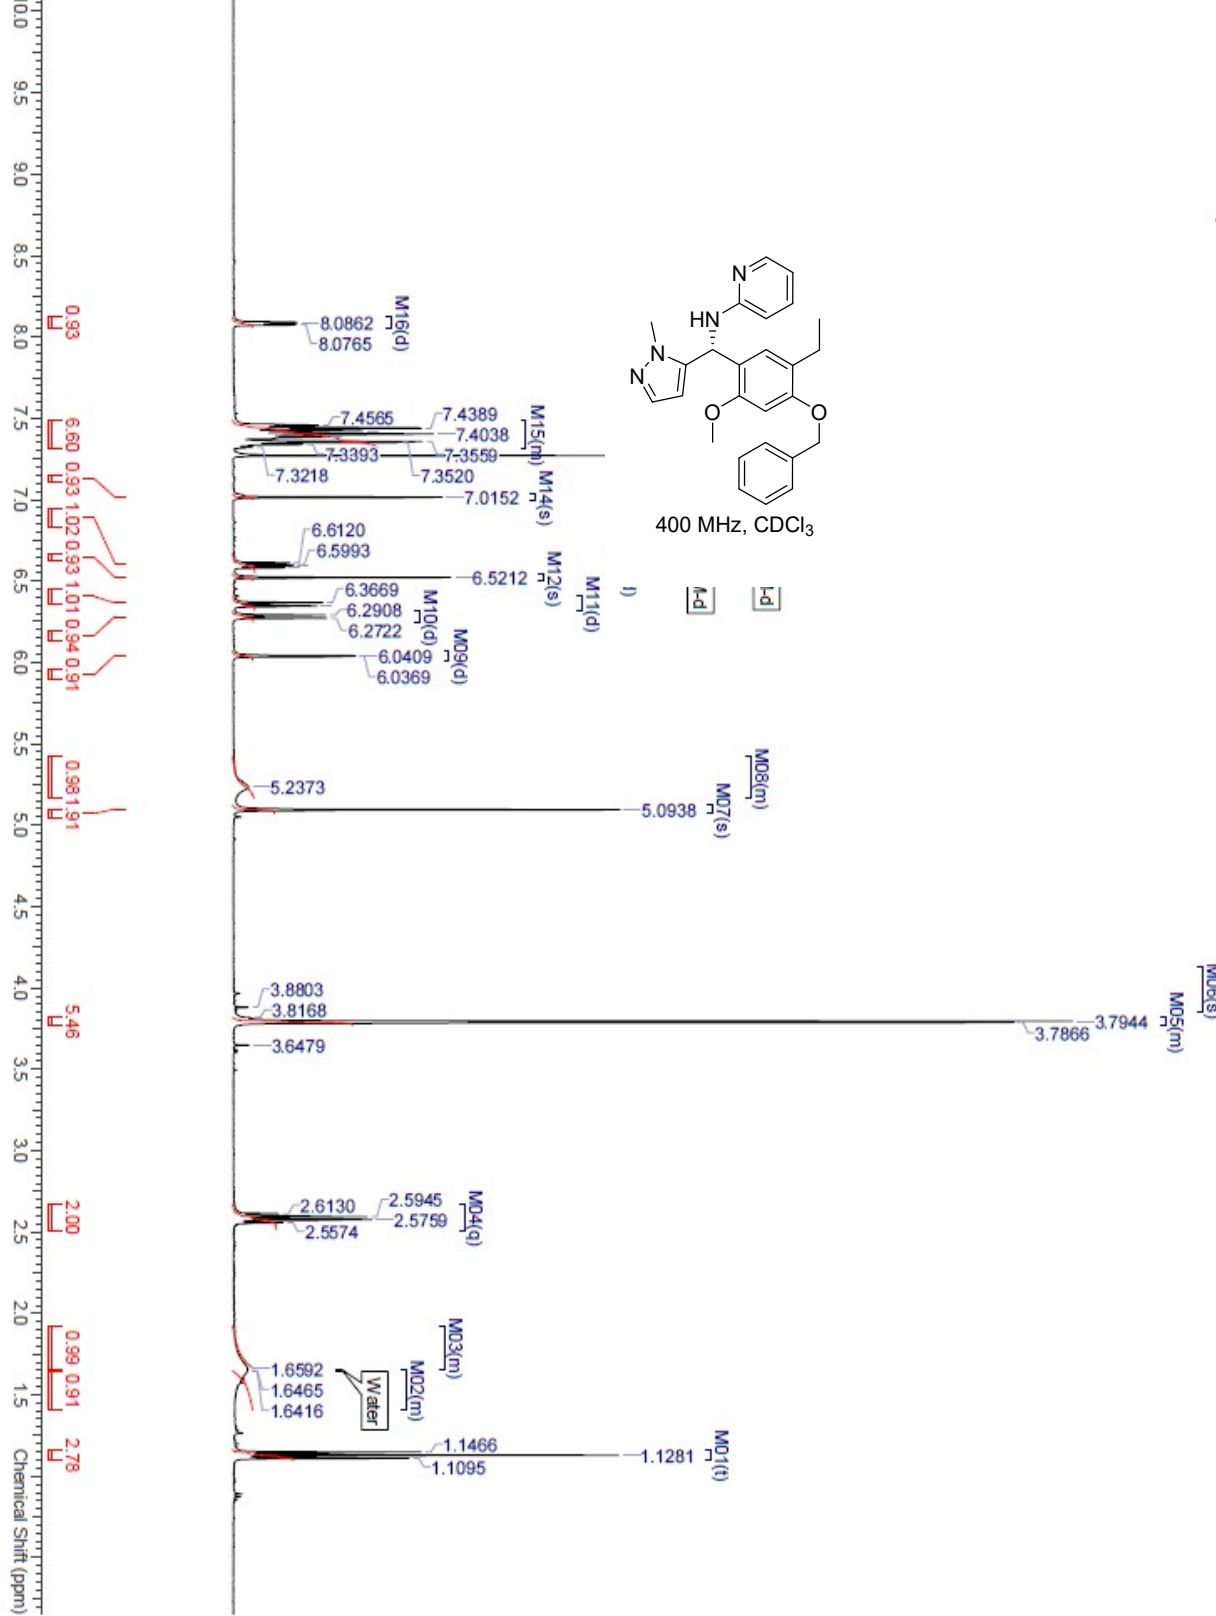

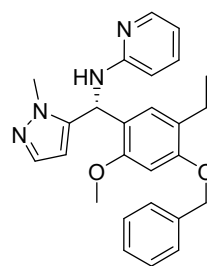101 MHz, CDCl<sub>3</sub>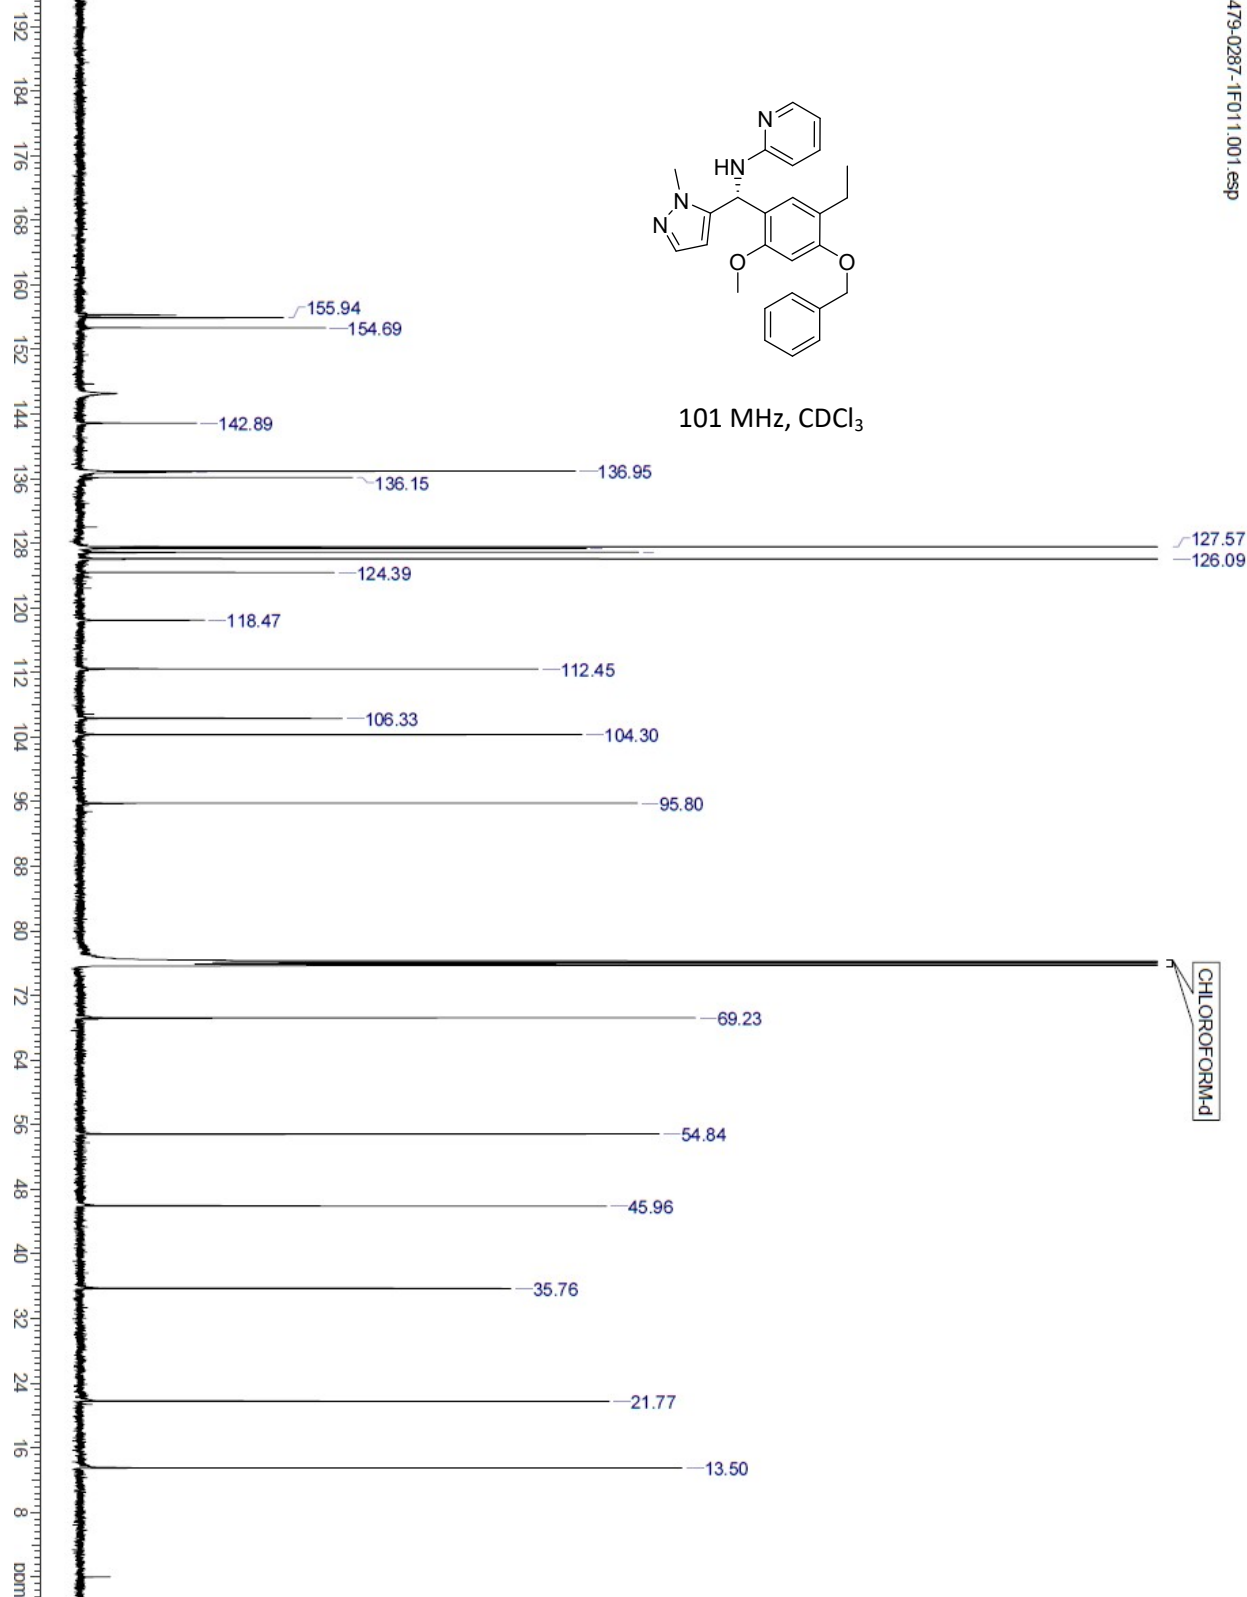

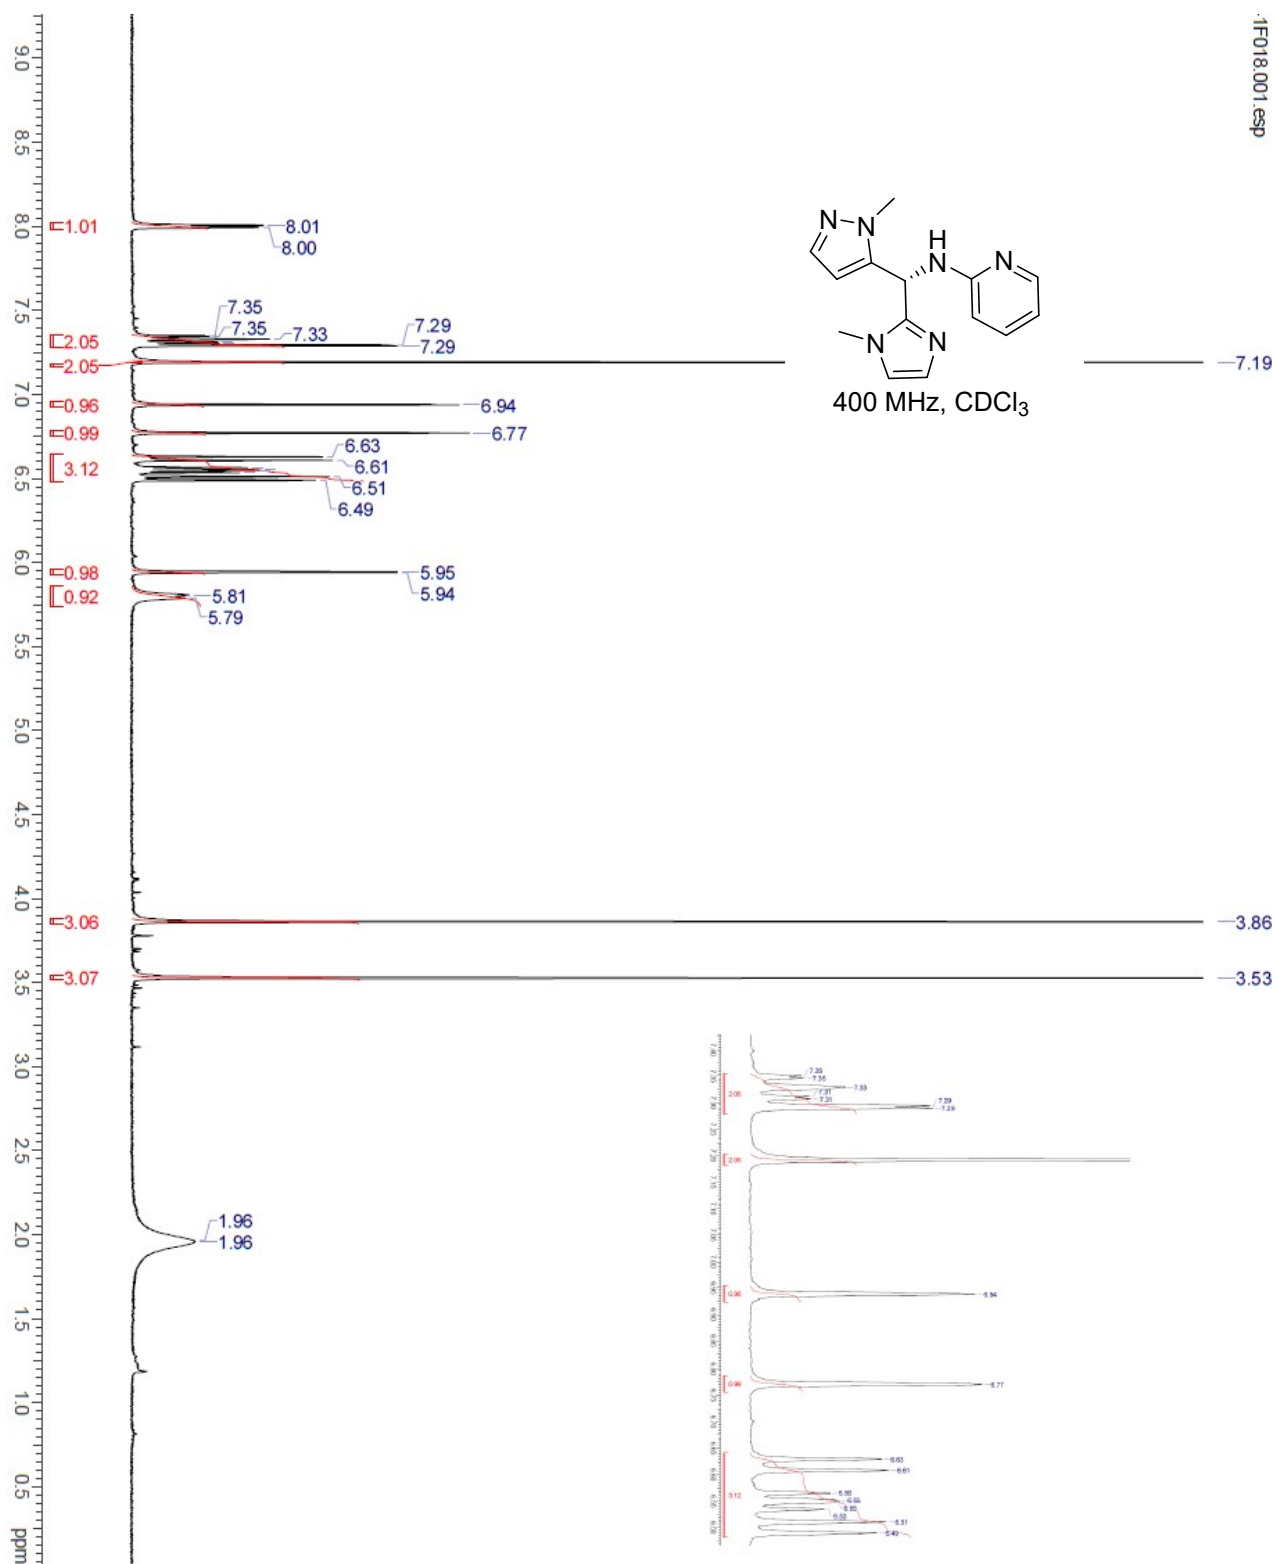

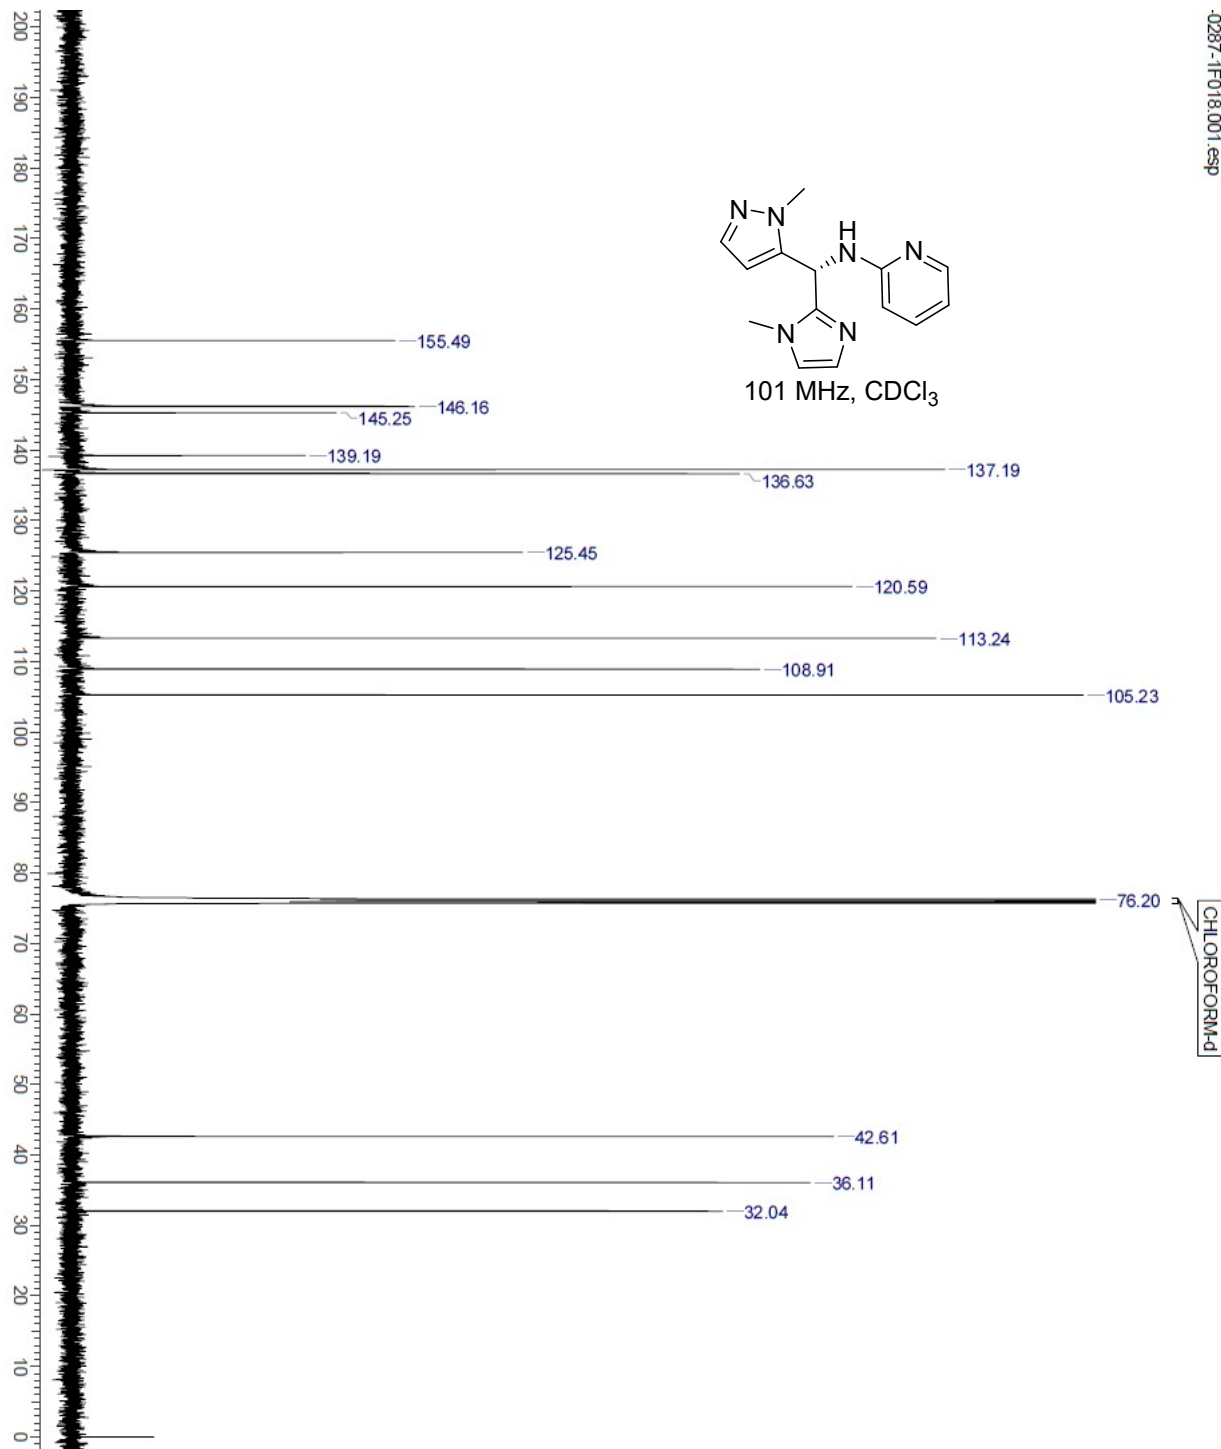

9a

S80

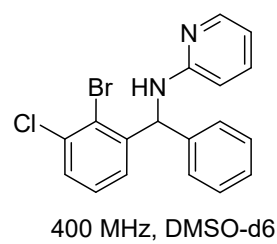

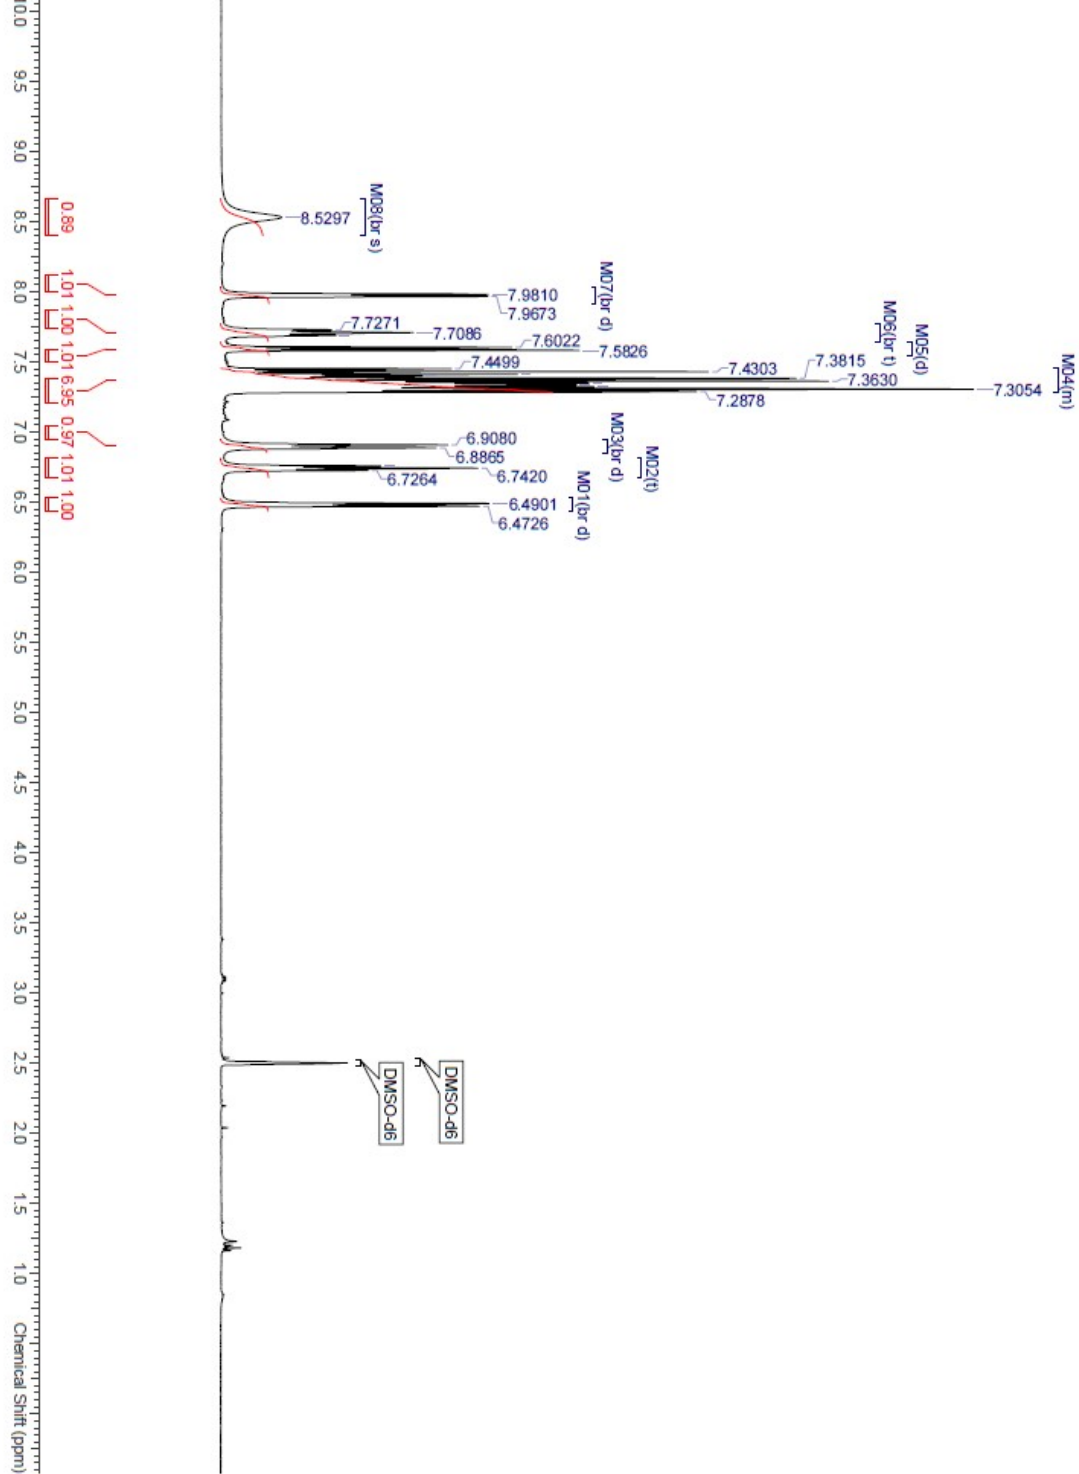

9b

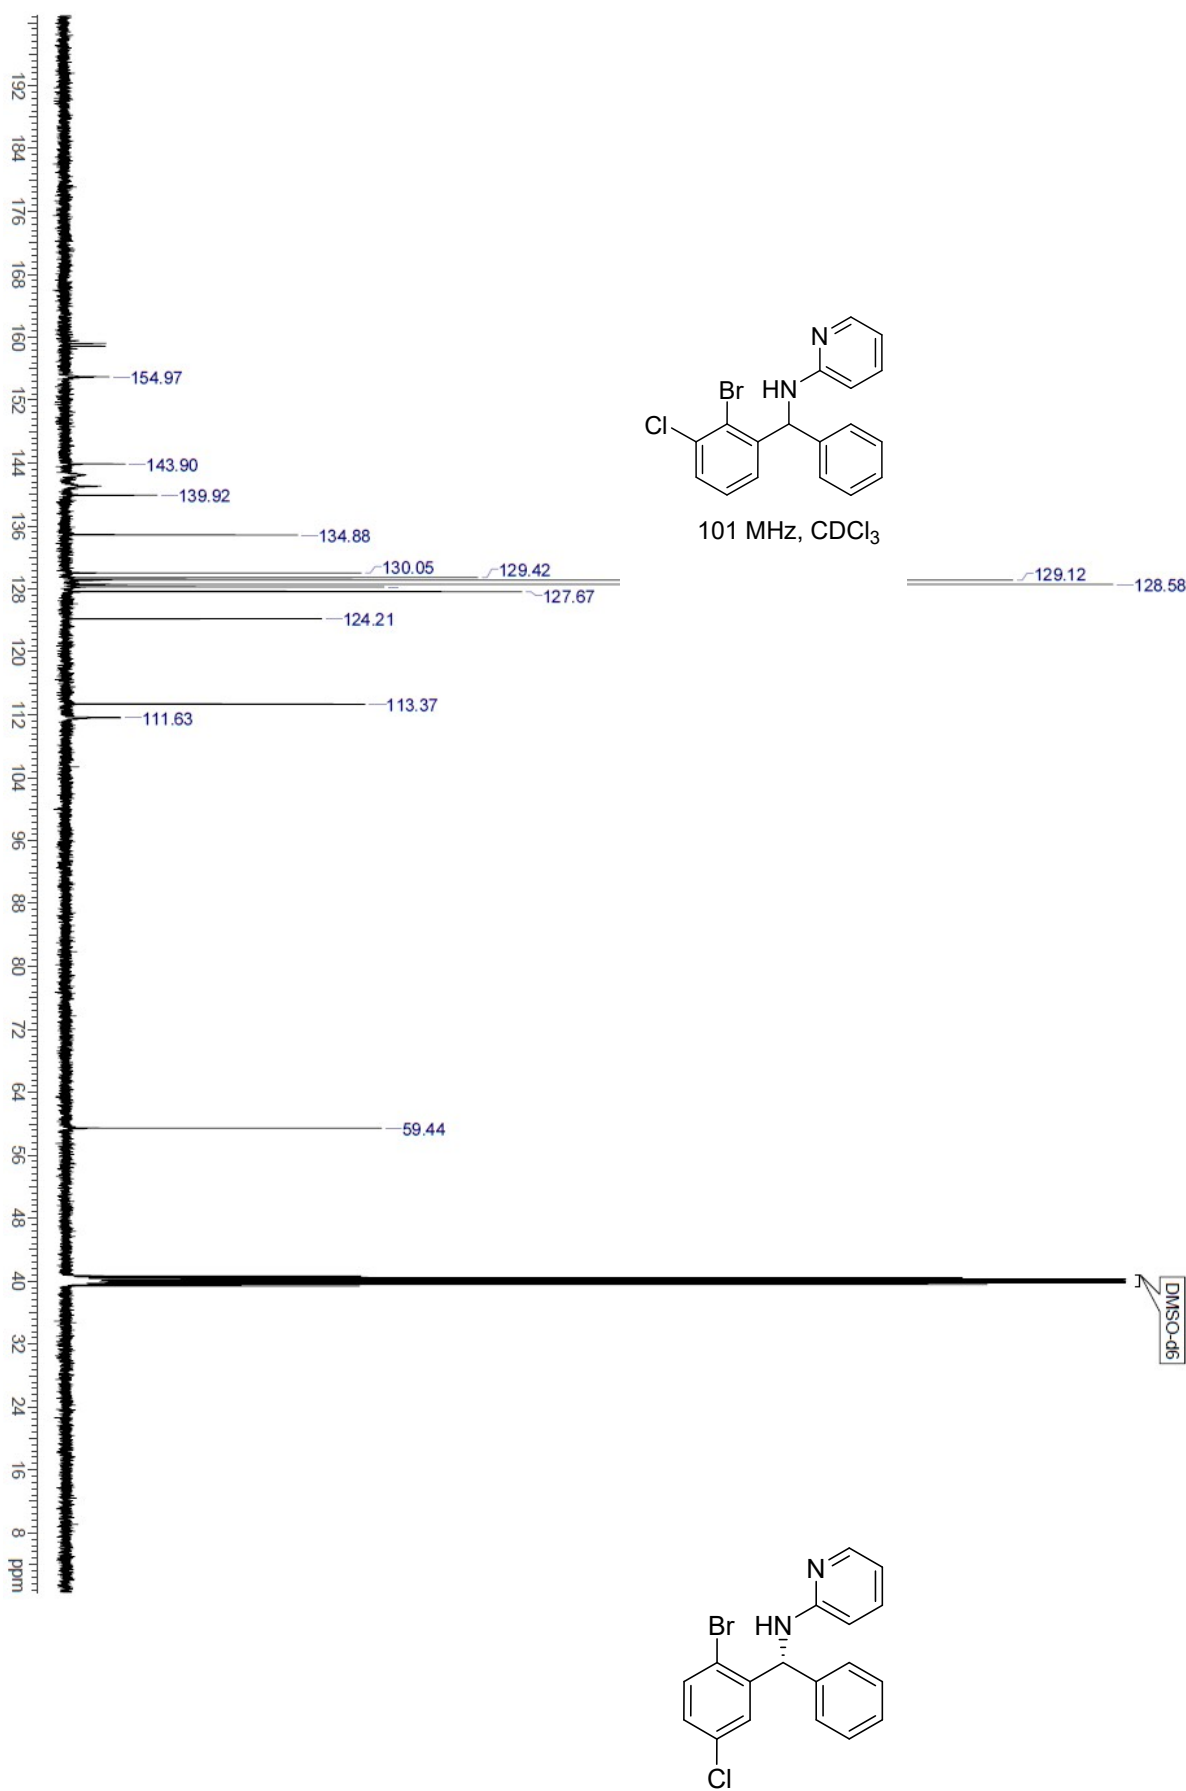

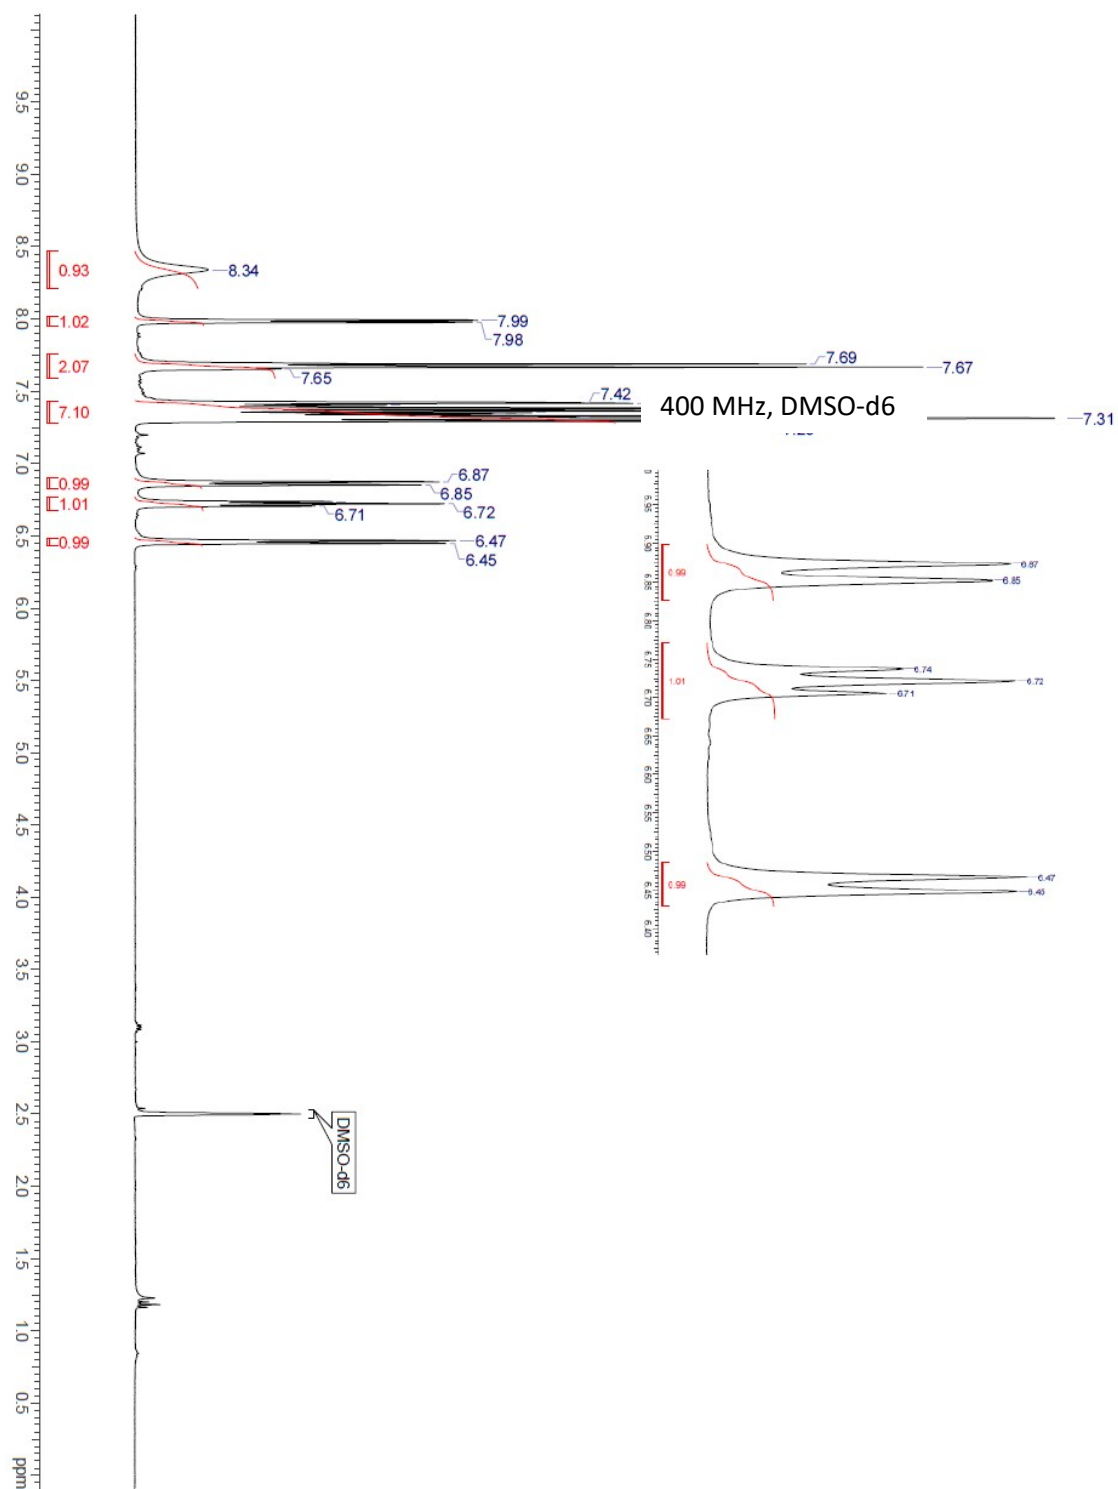

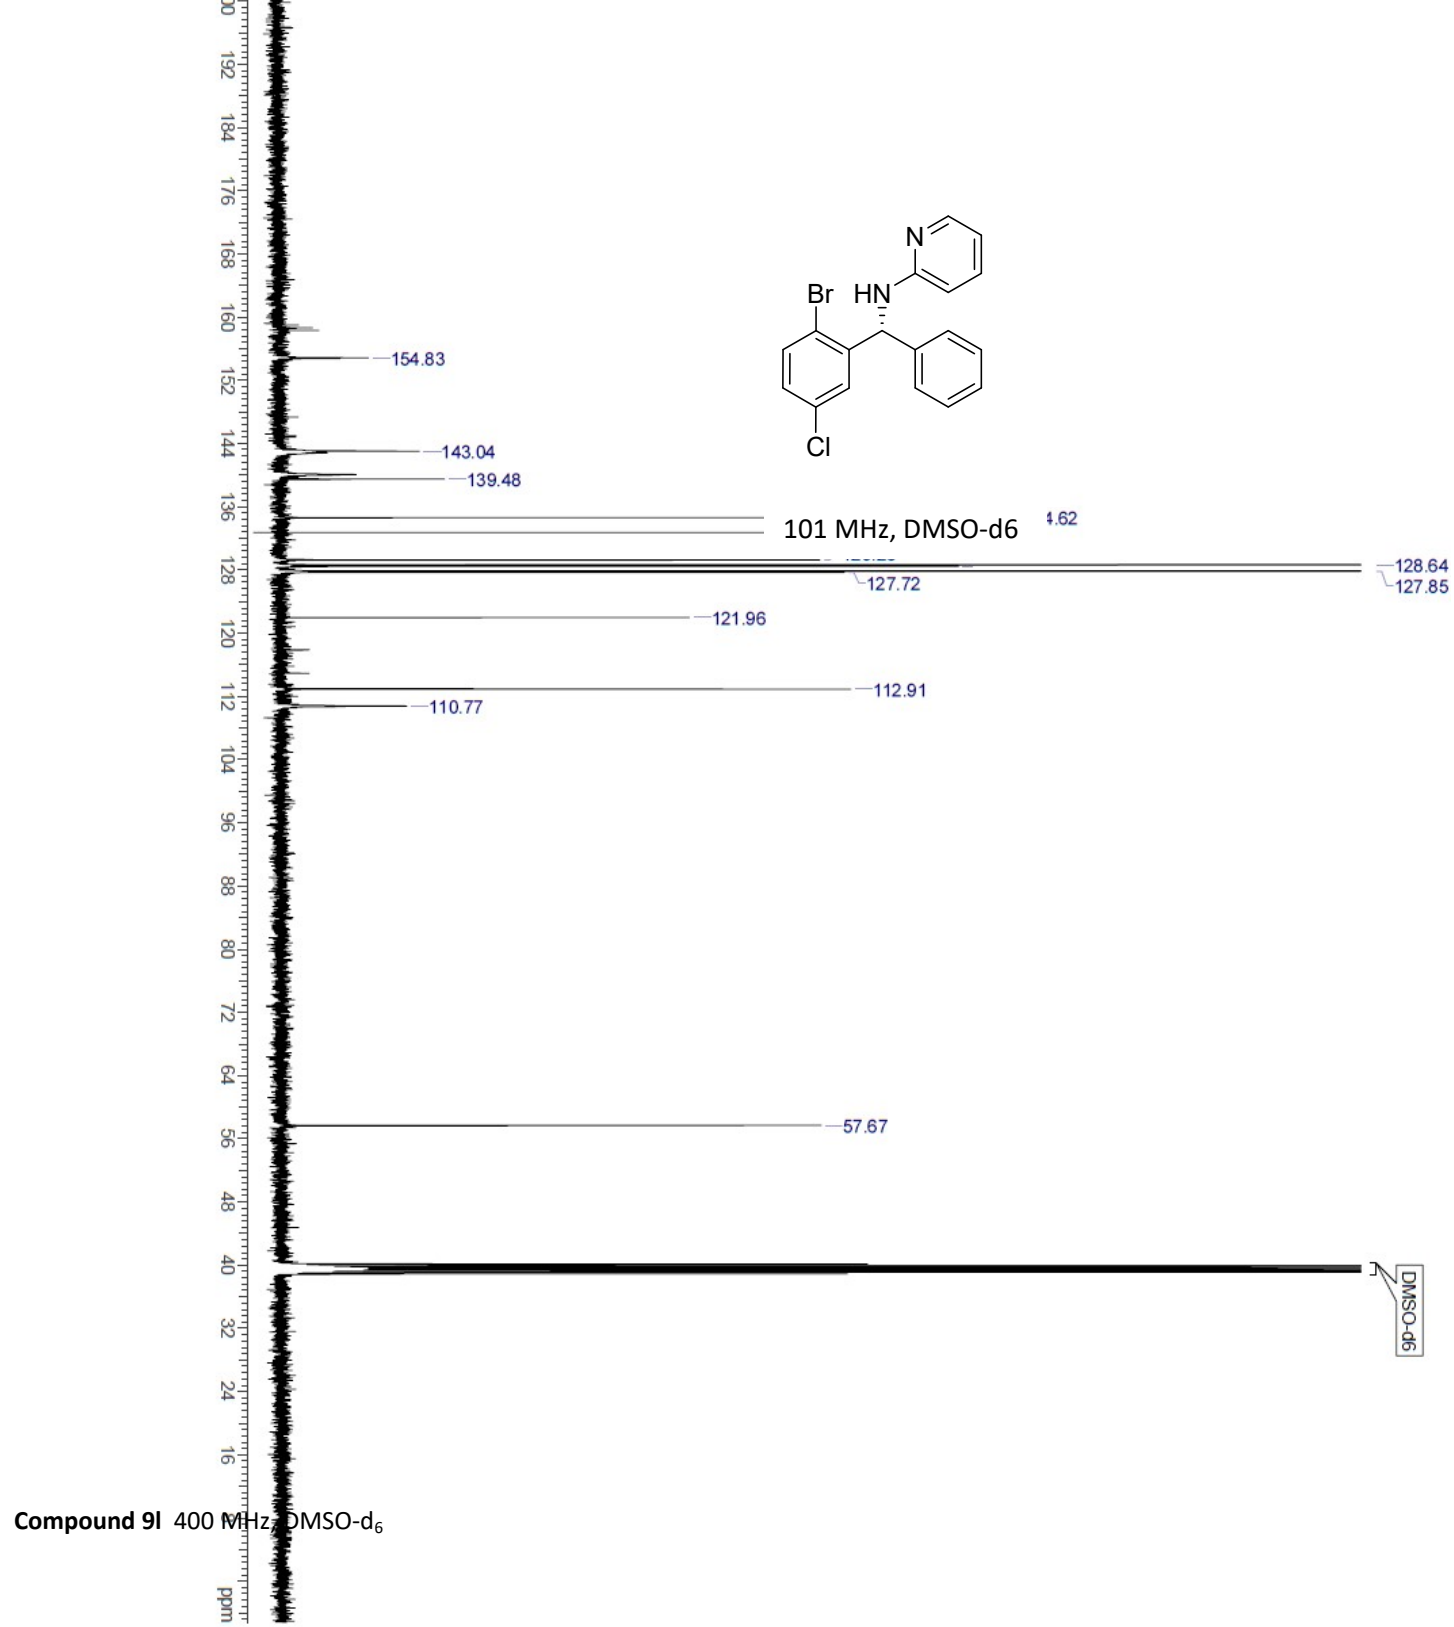

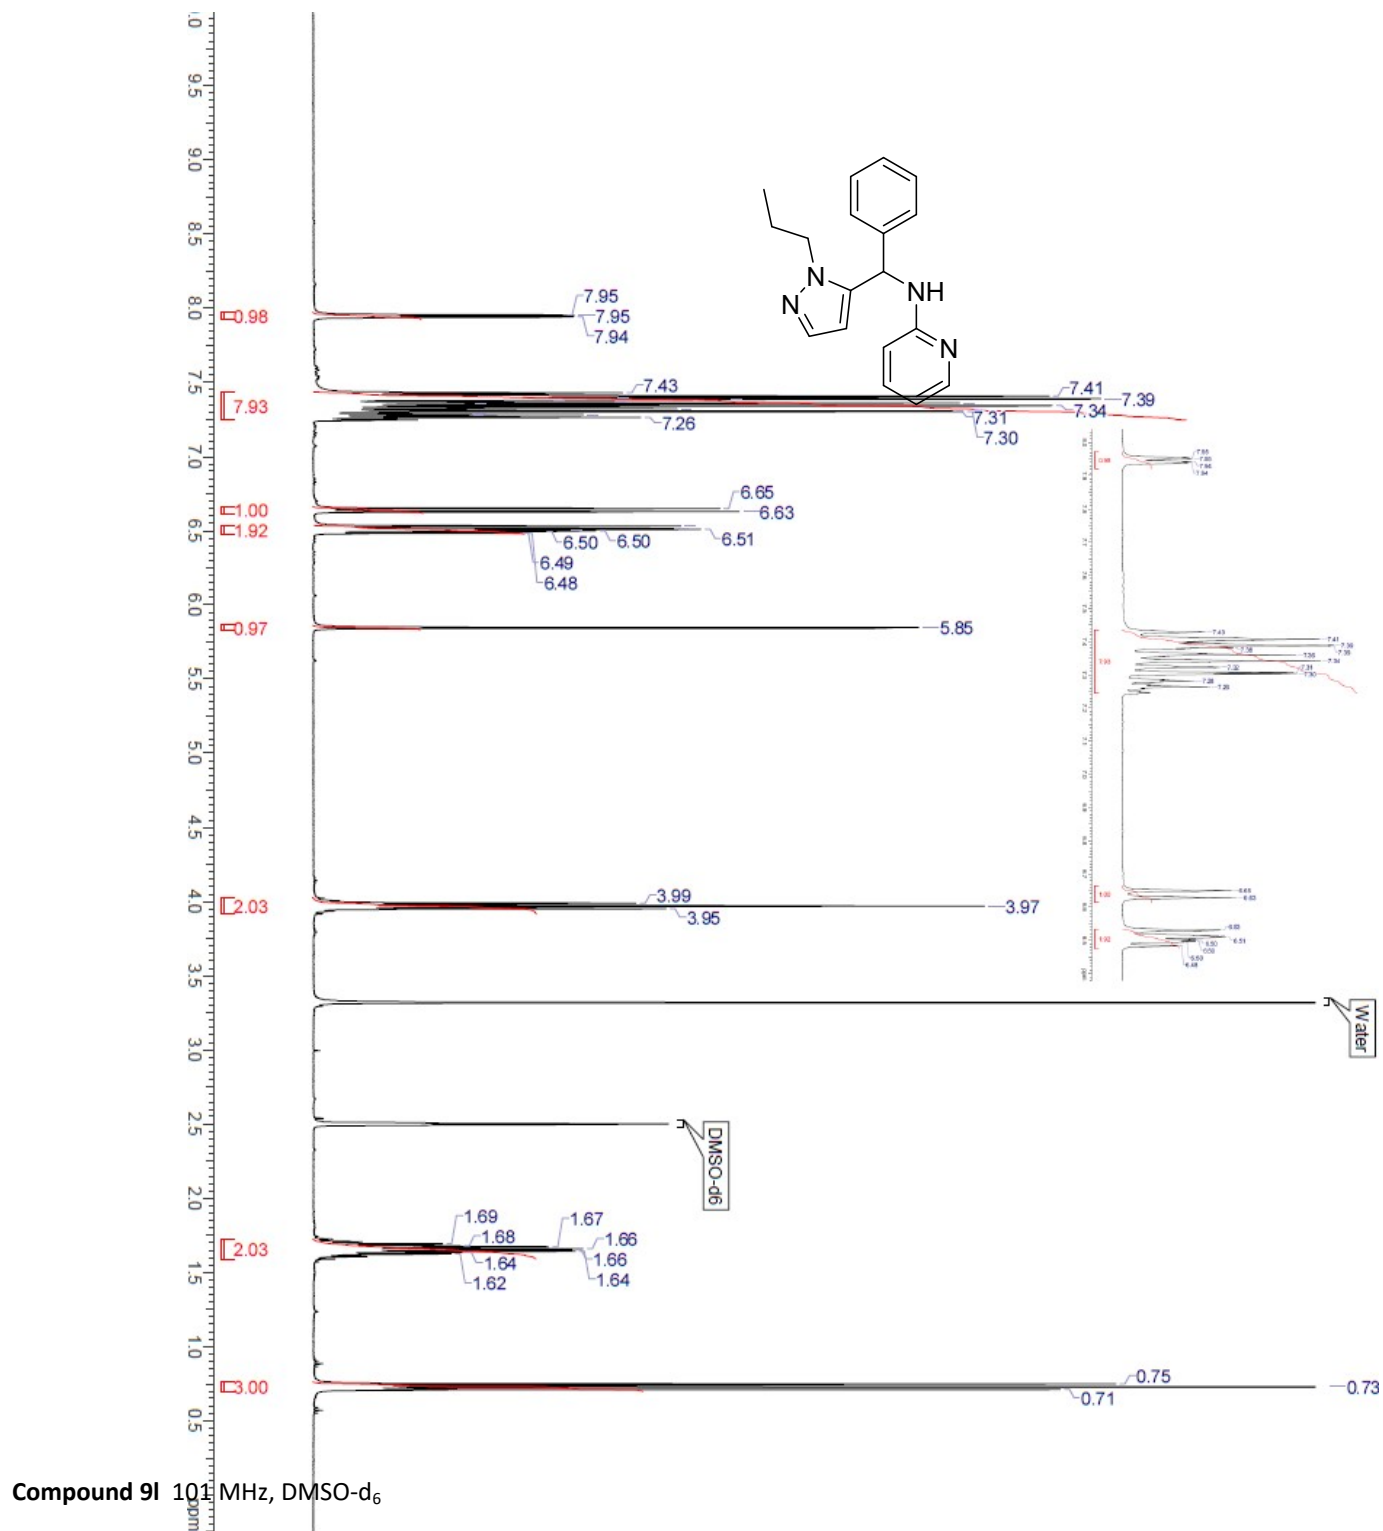

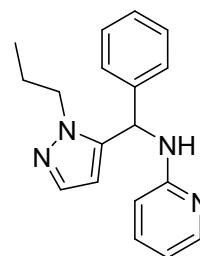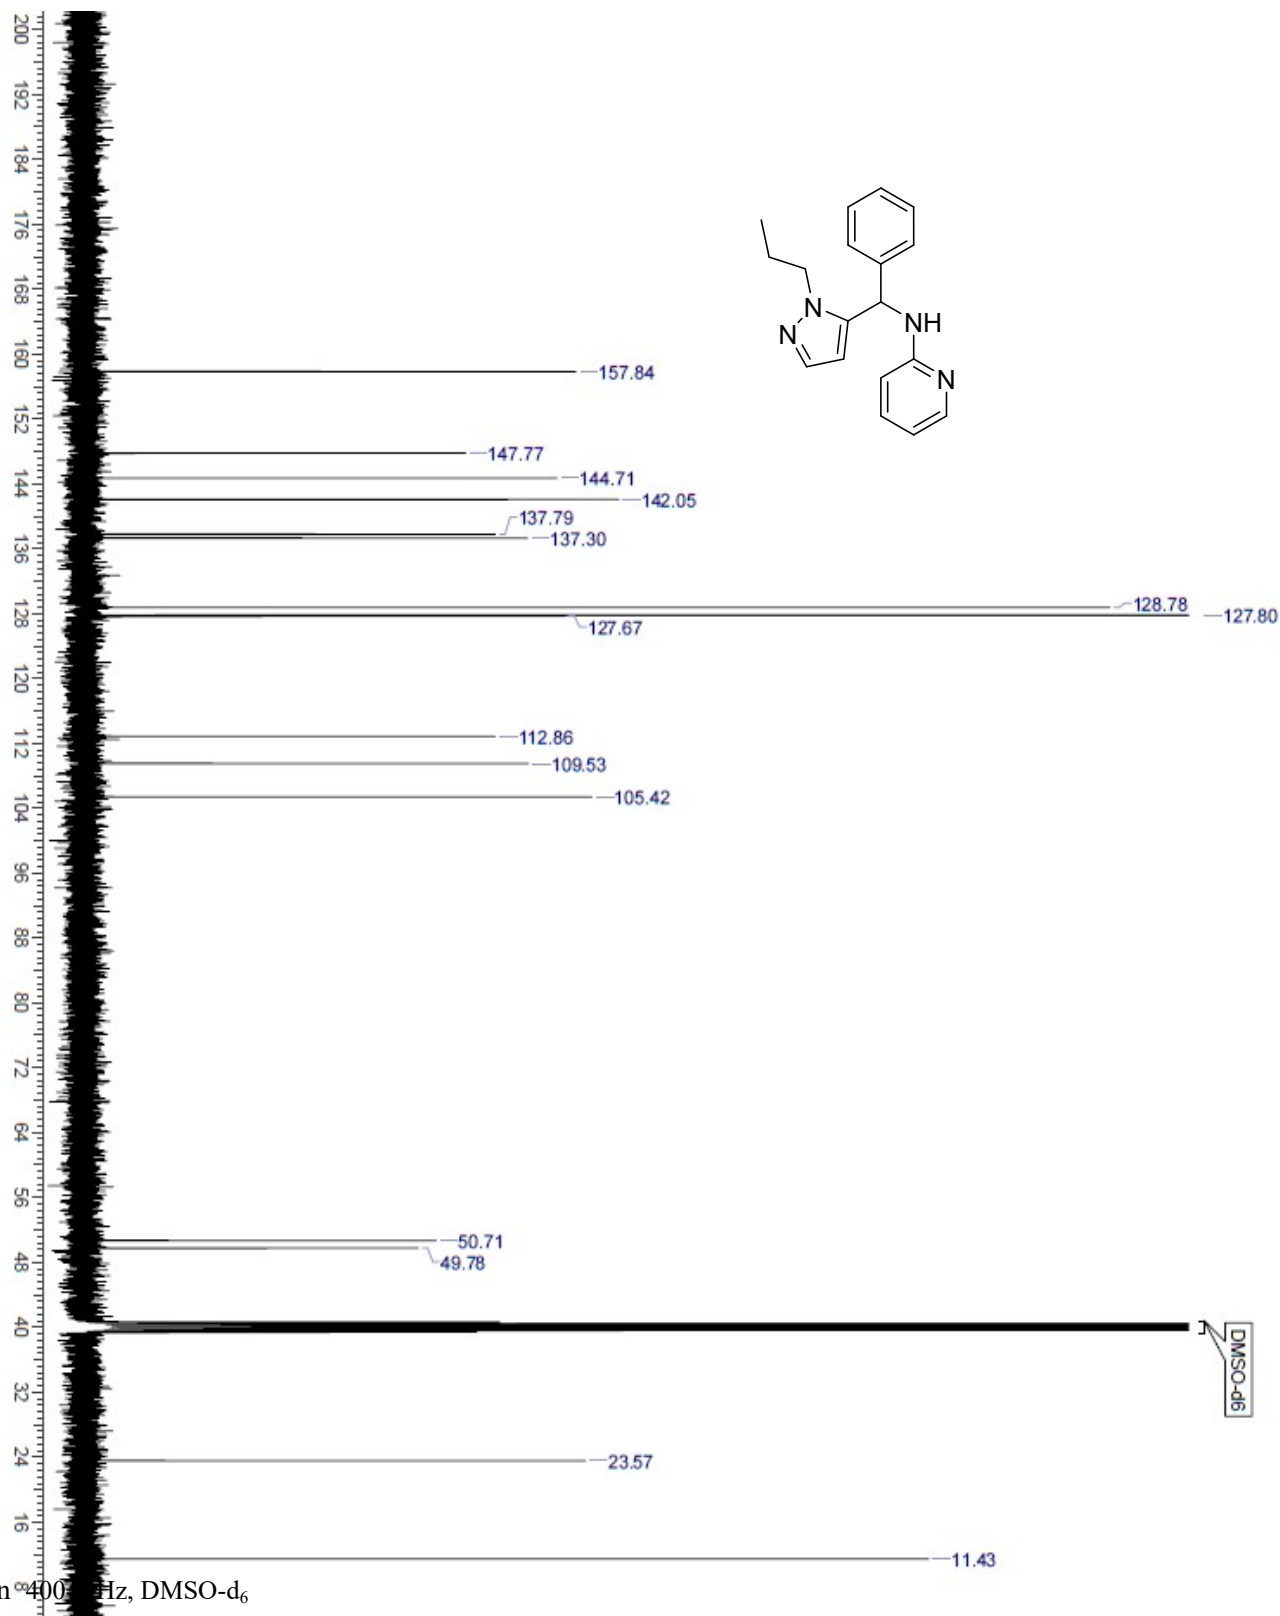

Compound 9n 400 MHz, DMSO-d<sub>6</sub>

Compound 9n 101 MHz, DMSO-d<sub>6</sub>

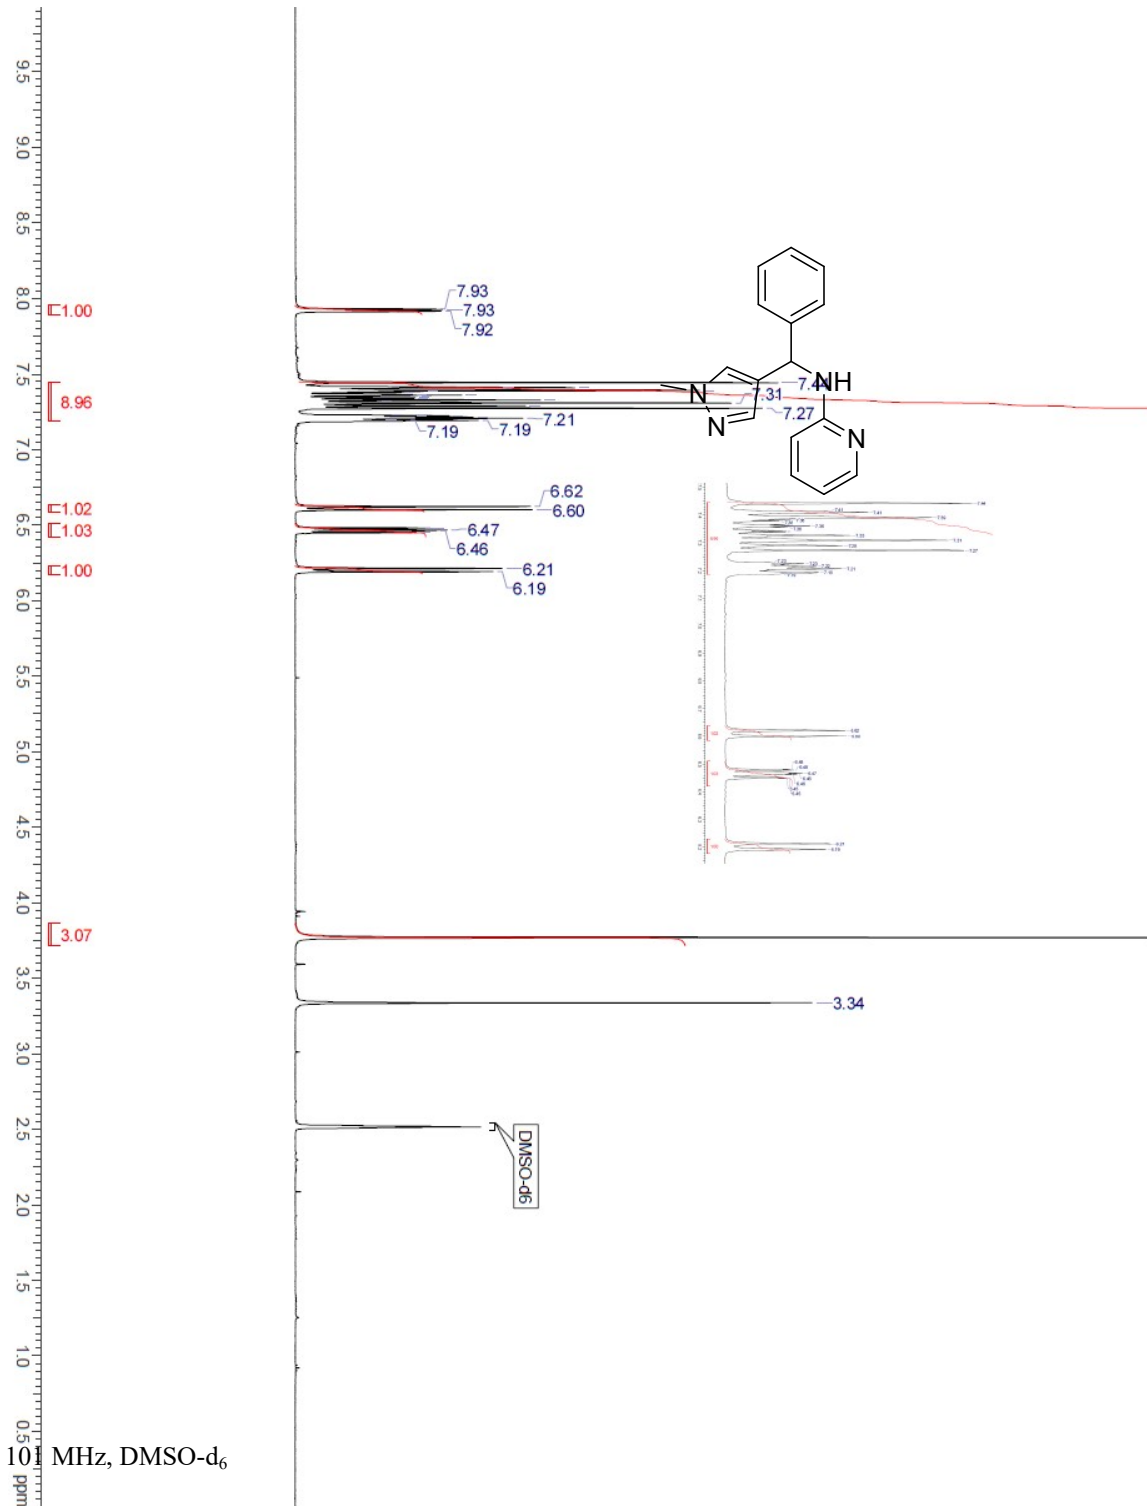

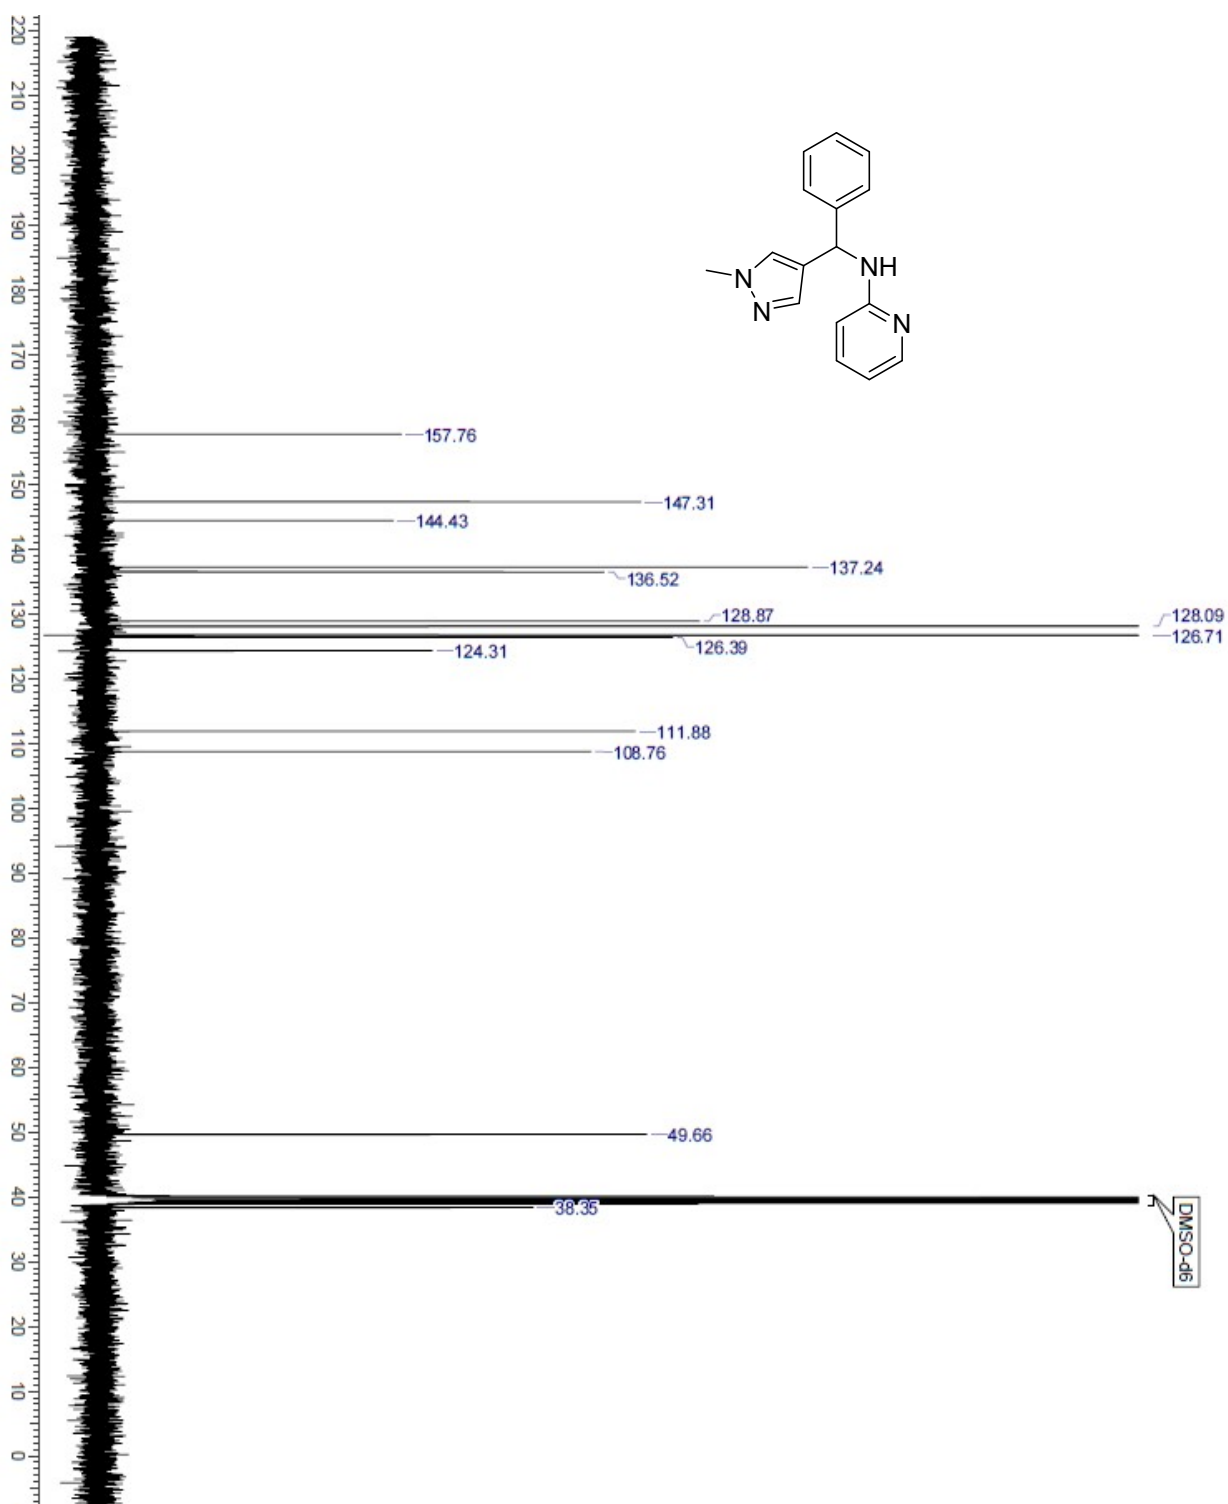

Compound 9o 400 MHz, DMSO-d<sub>6</sub>

Compound 9o 101 MHz, DMSO-d<sub>6</sub>

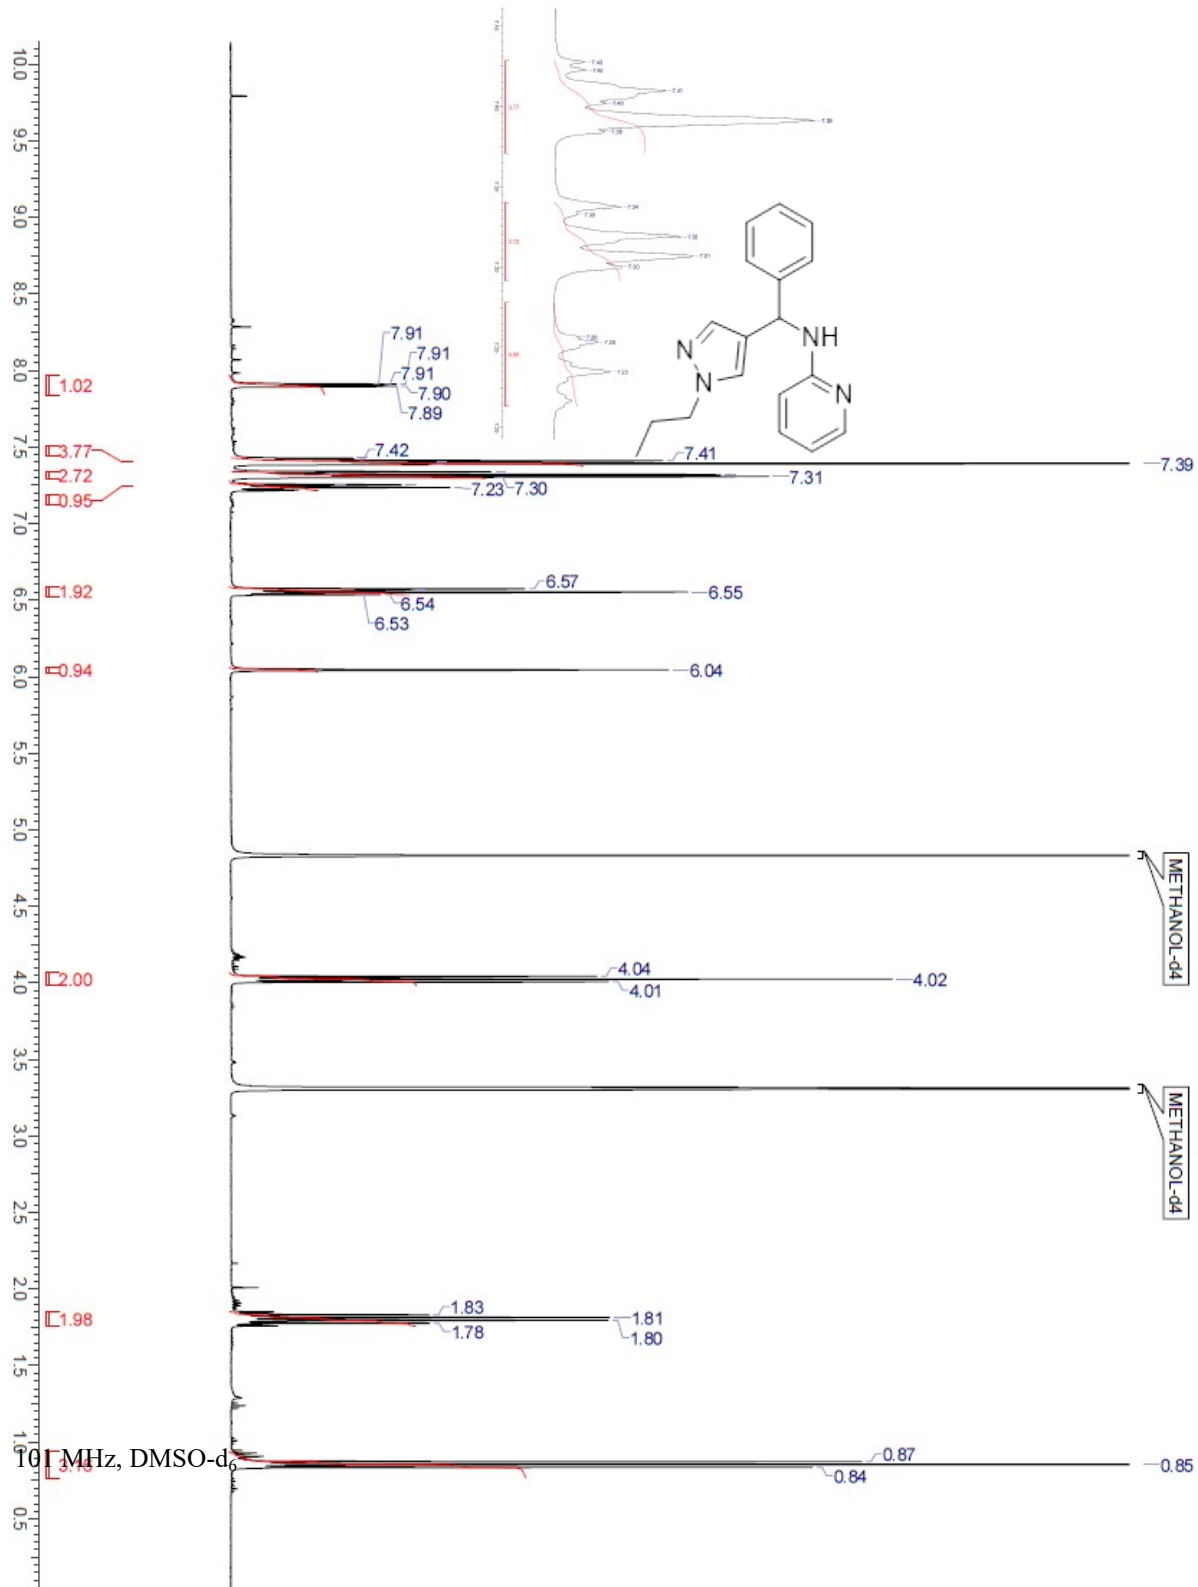

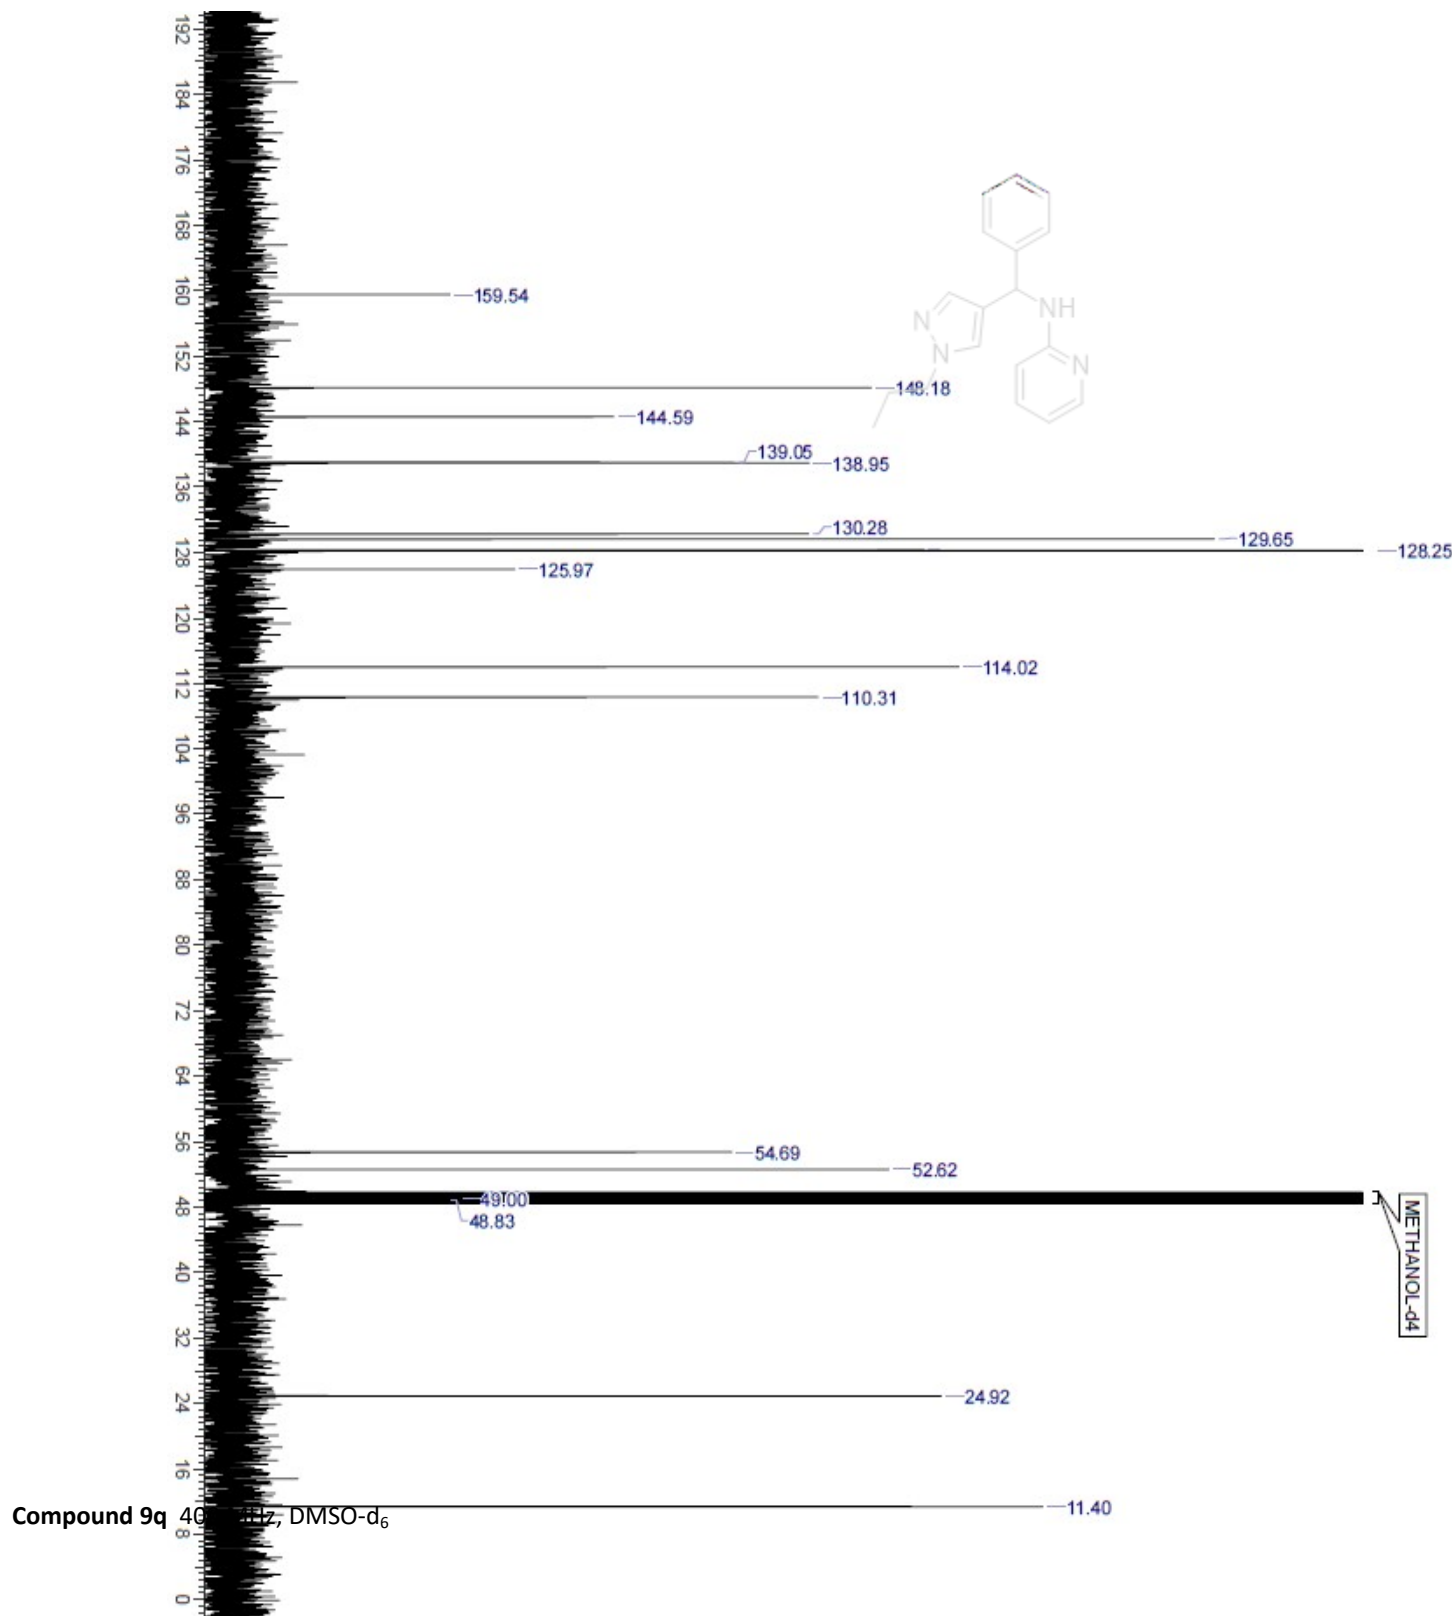

Compound 9q 101 MHz, DMSO-d<sub>6</sub>

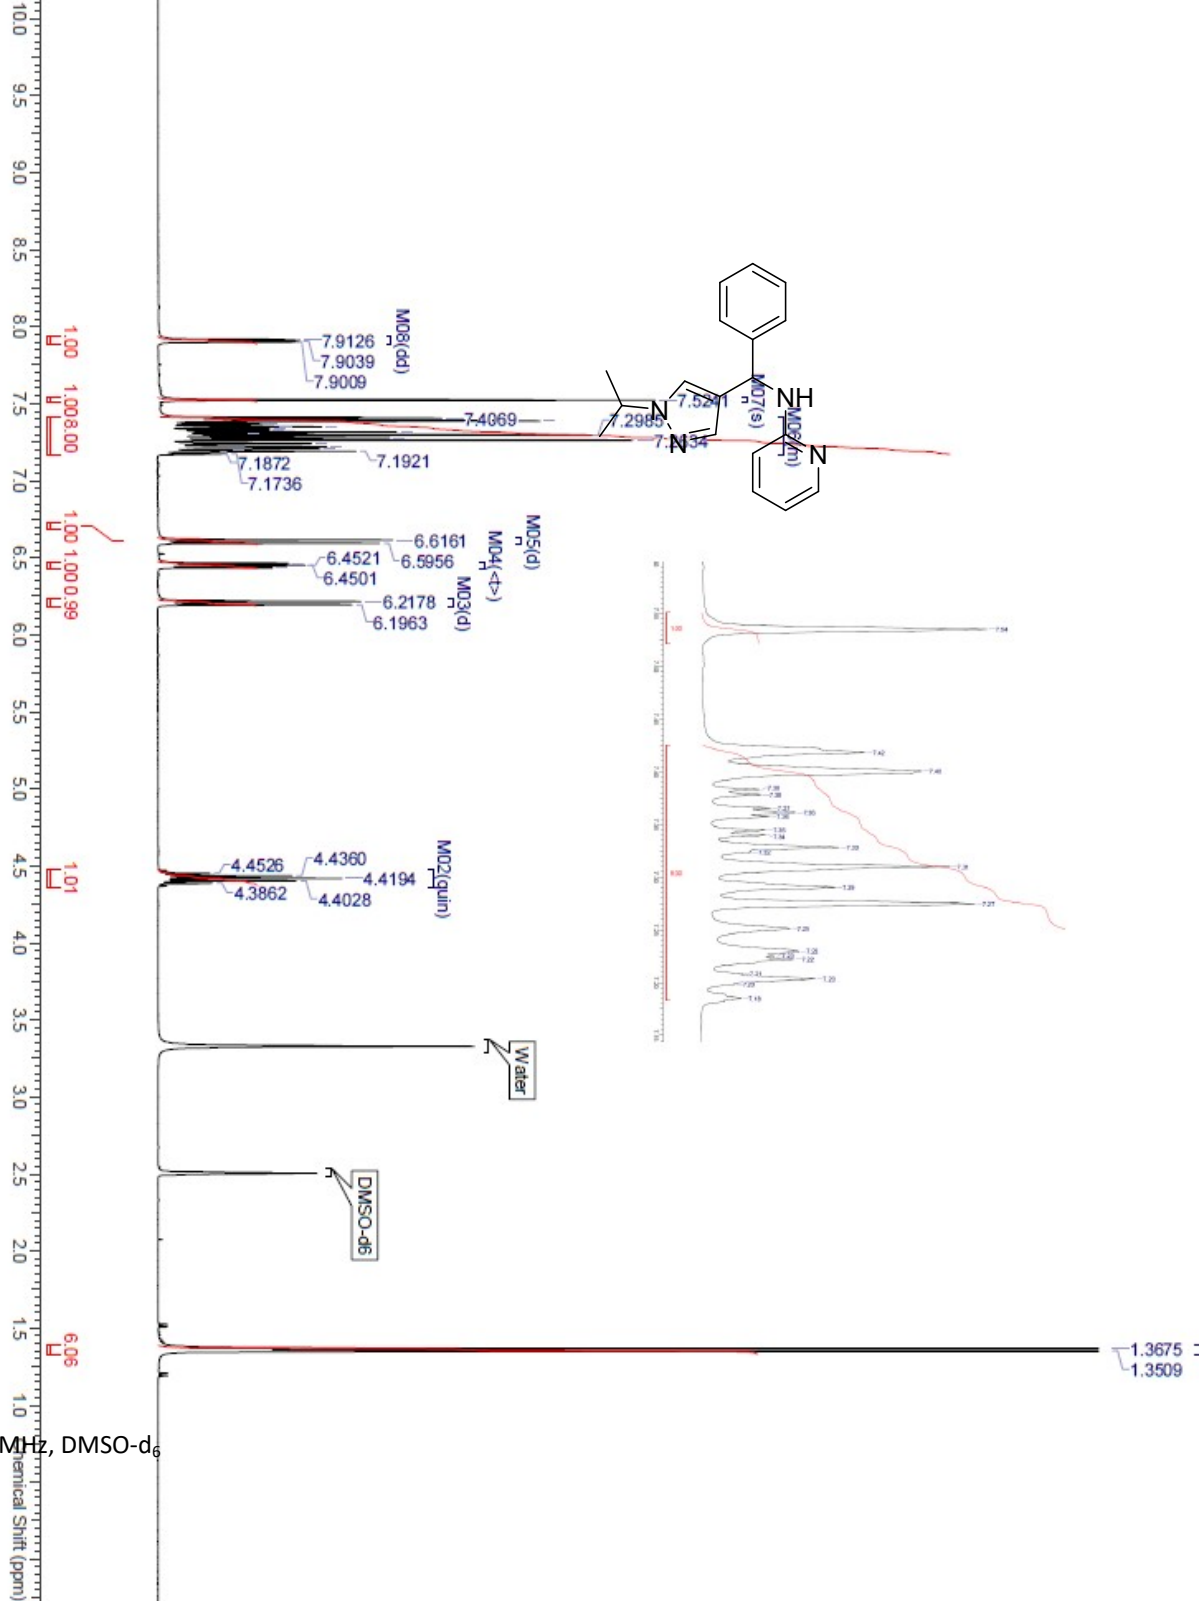

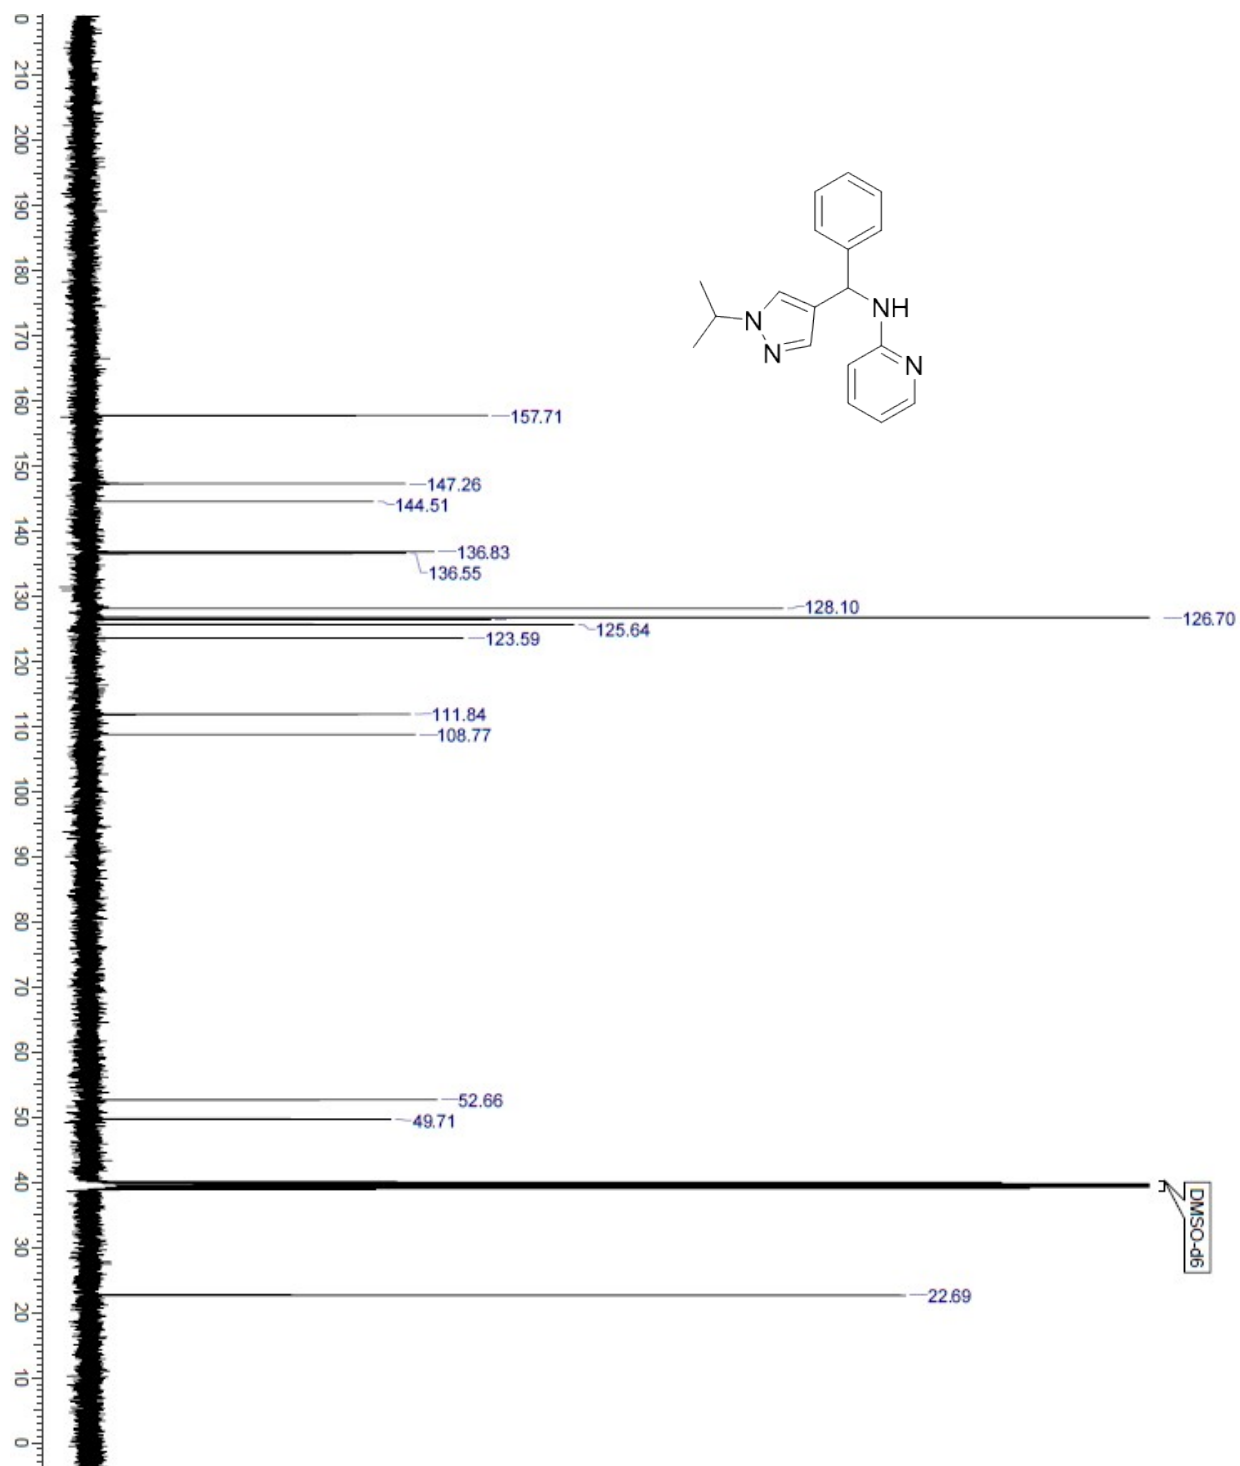

Compound 9s 400 MHz, DMSO-d<sub>6</sub>

Compound 9s 101 MHz, DMSO-d<sub>6</sub>

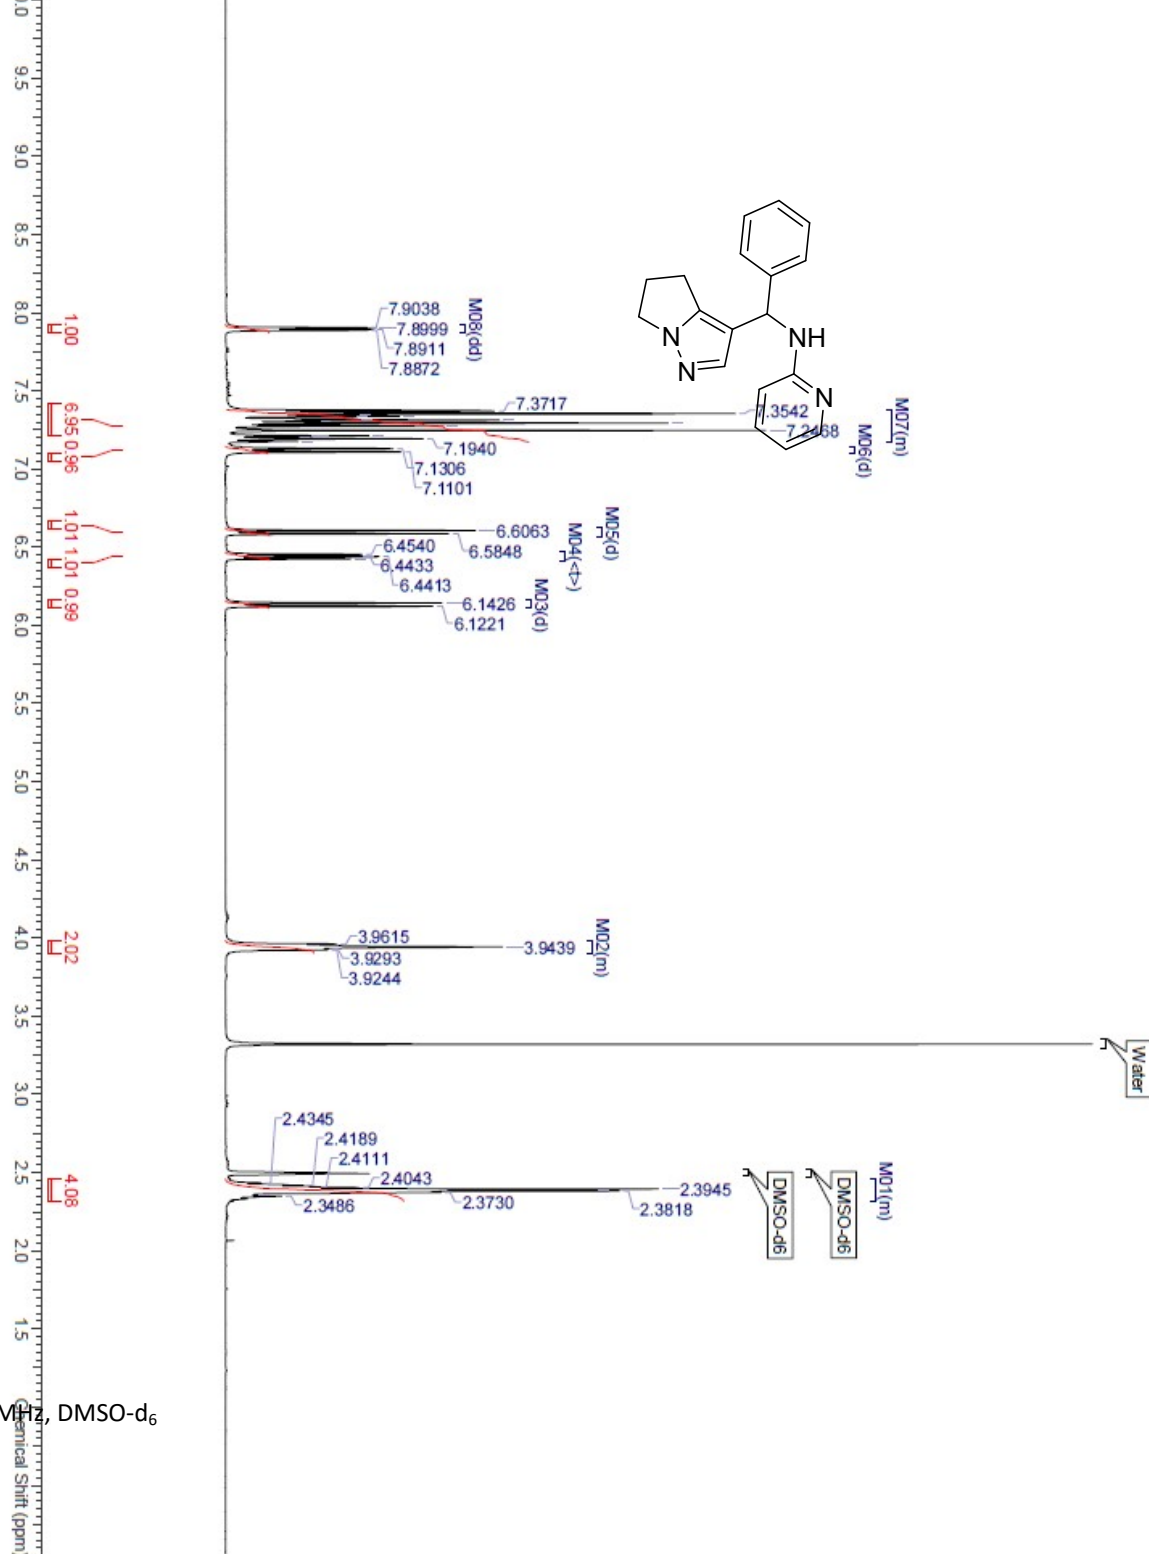

Compound 9t 400 MHz, DMSO-d<sub>6</sub>

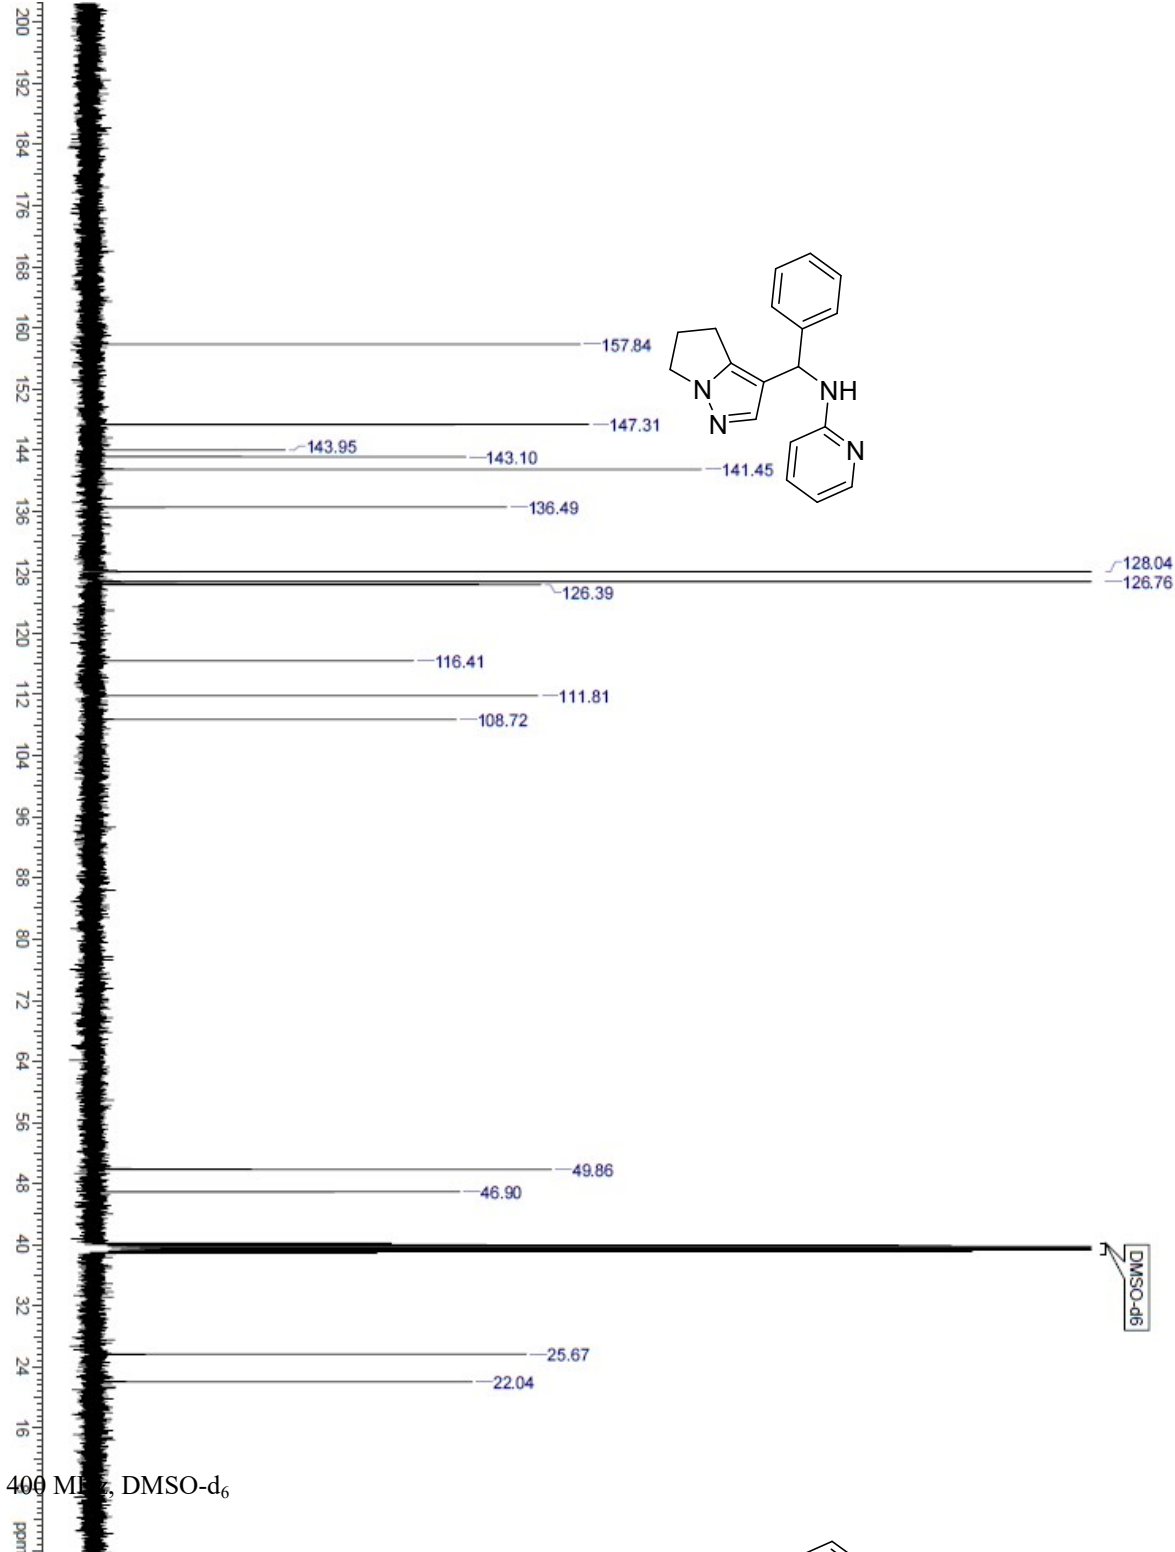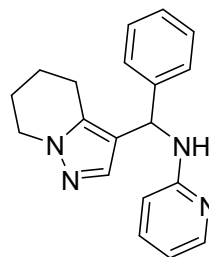

Compound 9t 101 MHz, DMSO-d<sub>6</sub>

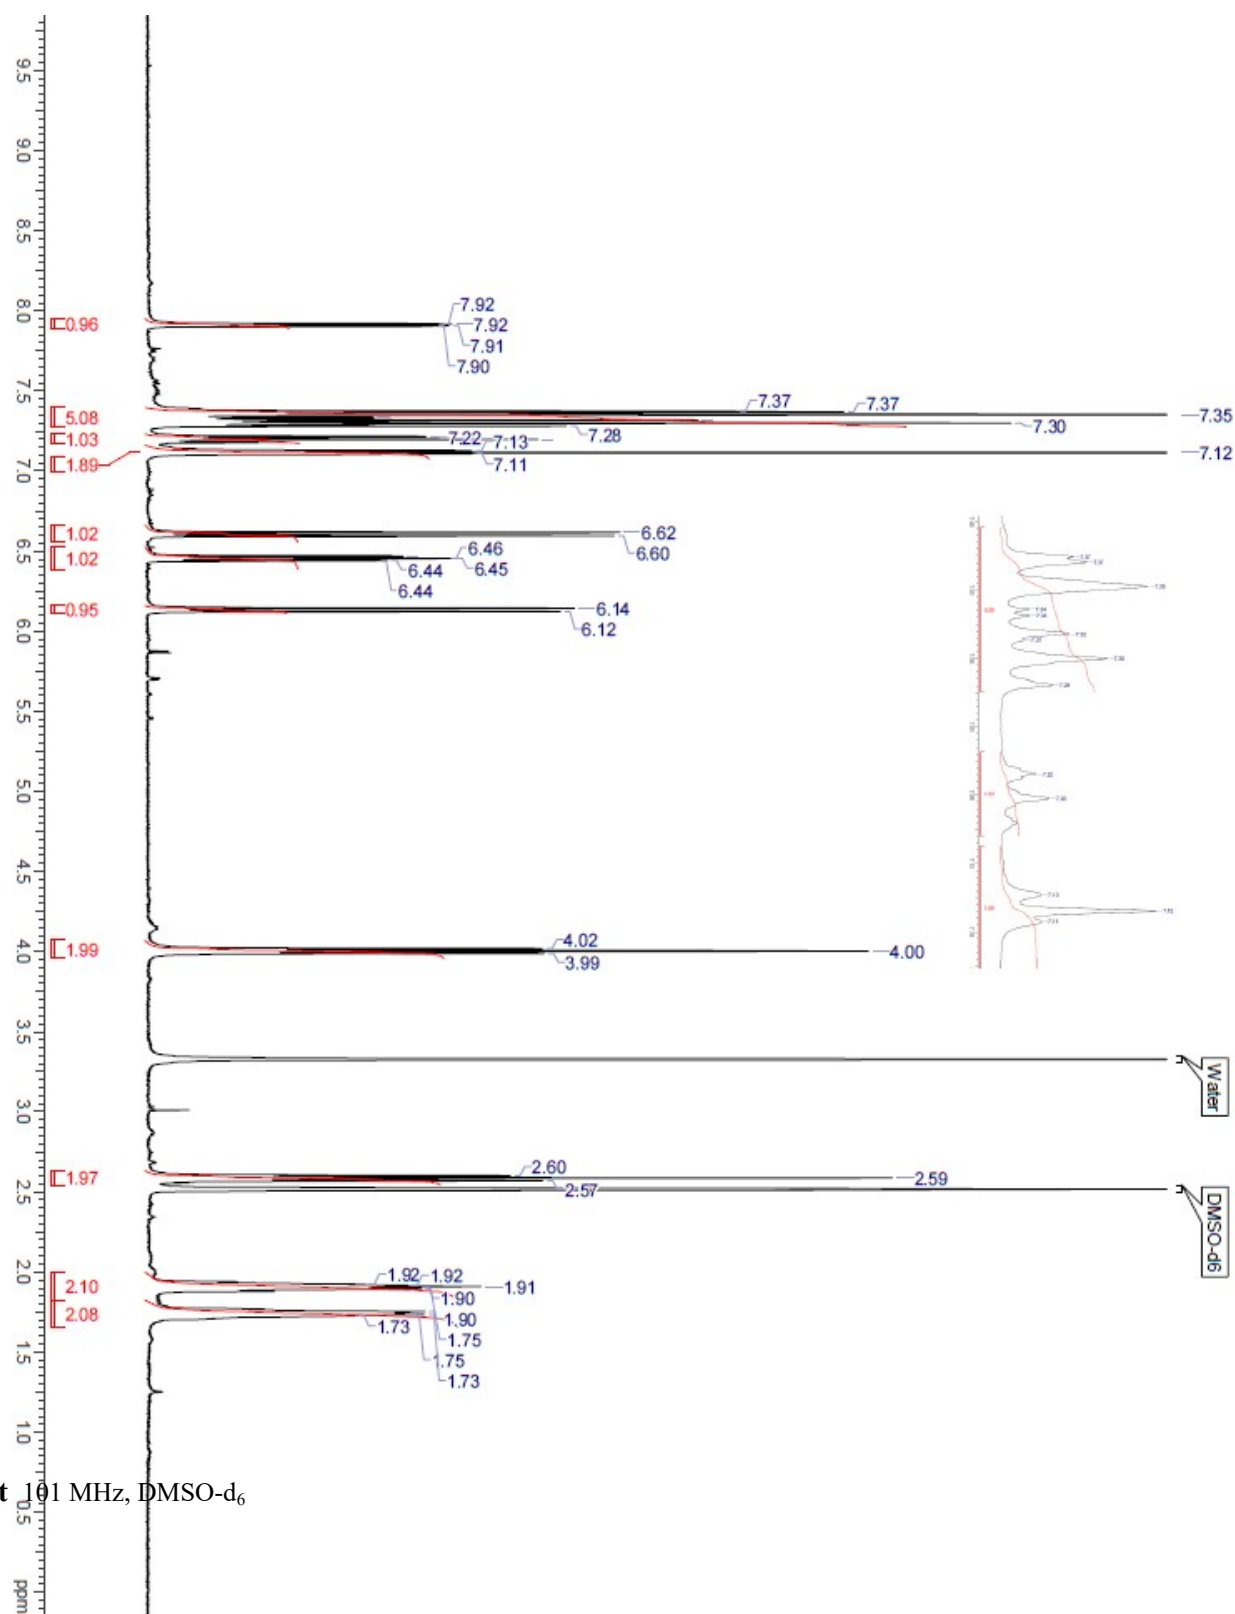

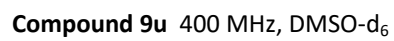

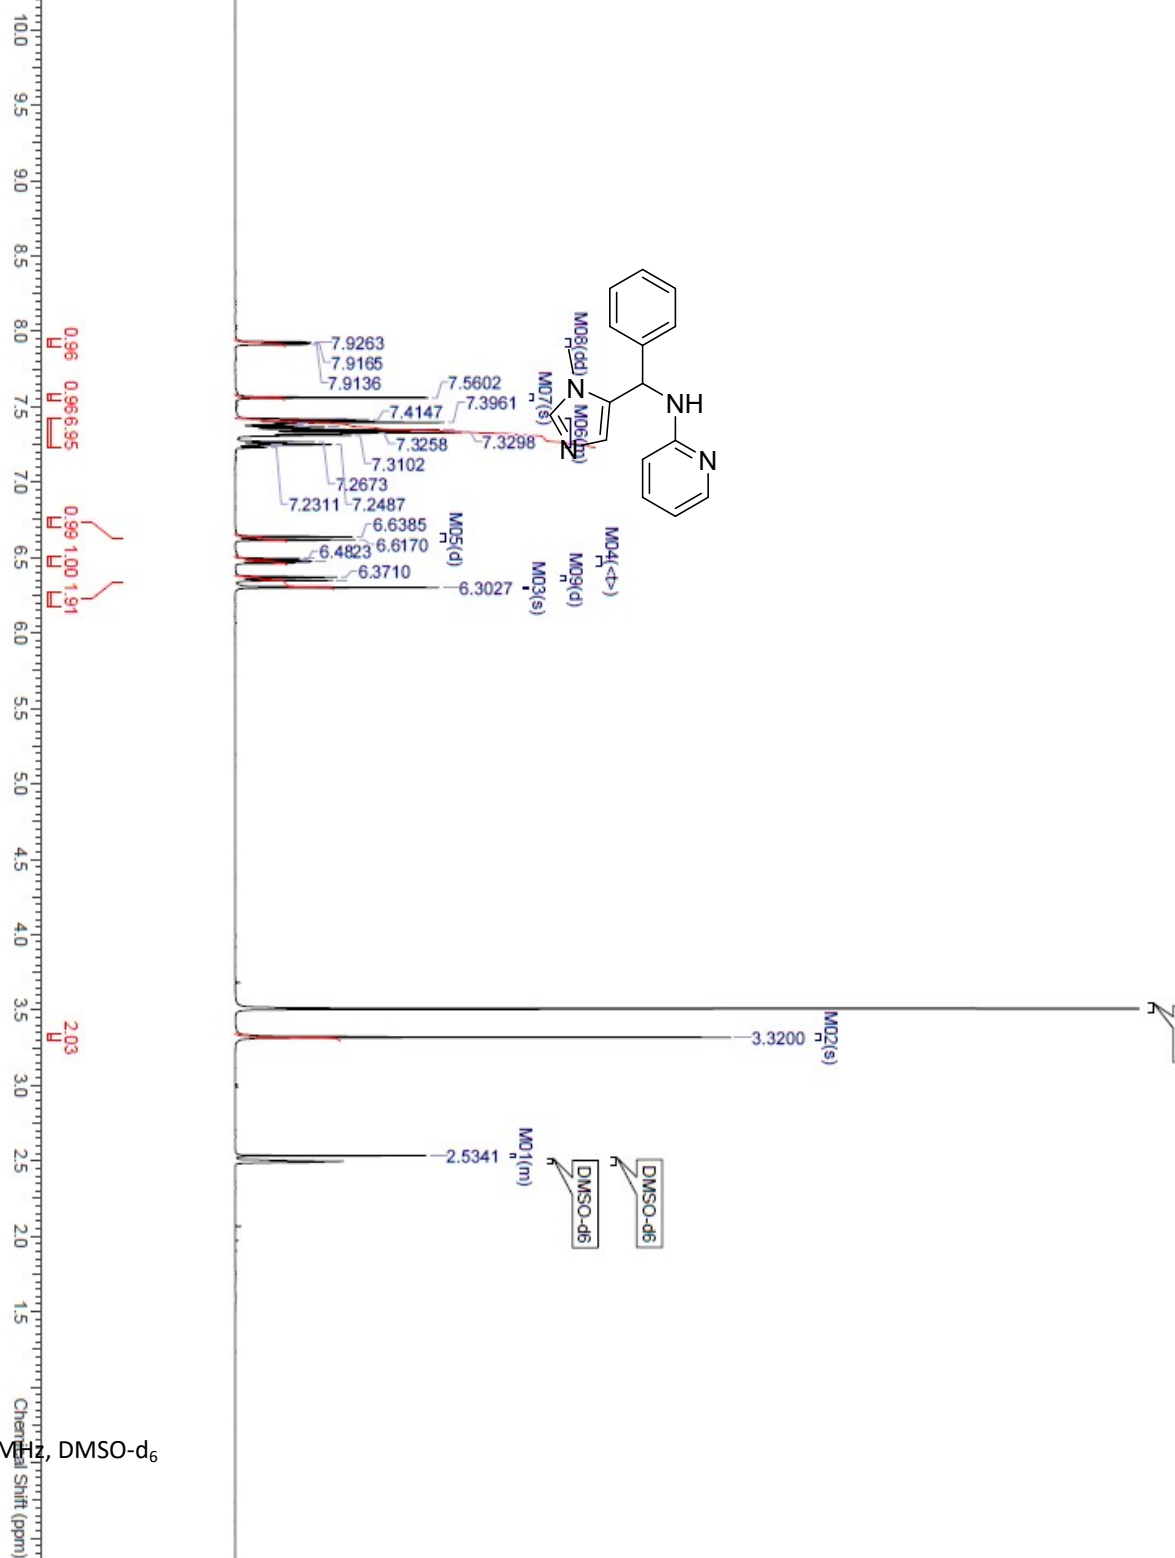

Compound 9u 101 MHz, DMSO-d<sub>6</sub>

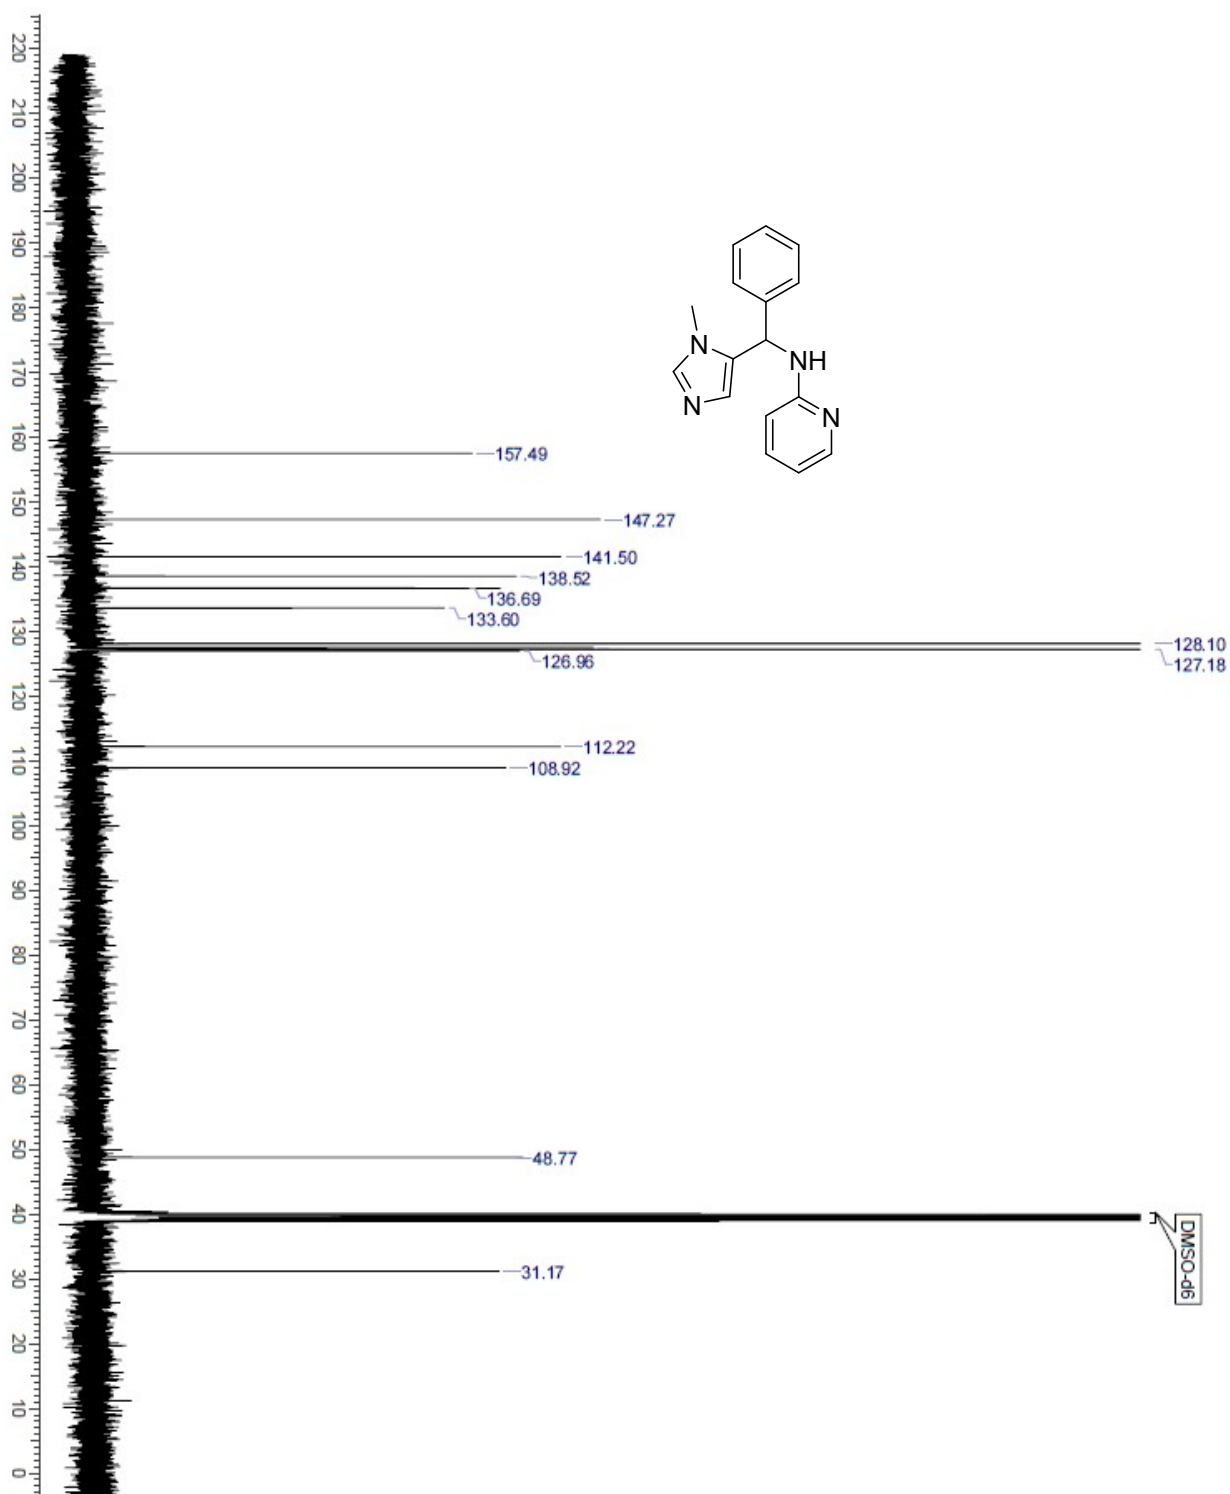

Compound 9v 400 MHz, DMSO-d<sub>6</sub>

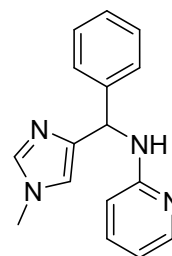

Compound 9v 101 MHz, DMSO-d<sub>6</sub>

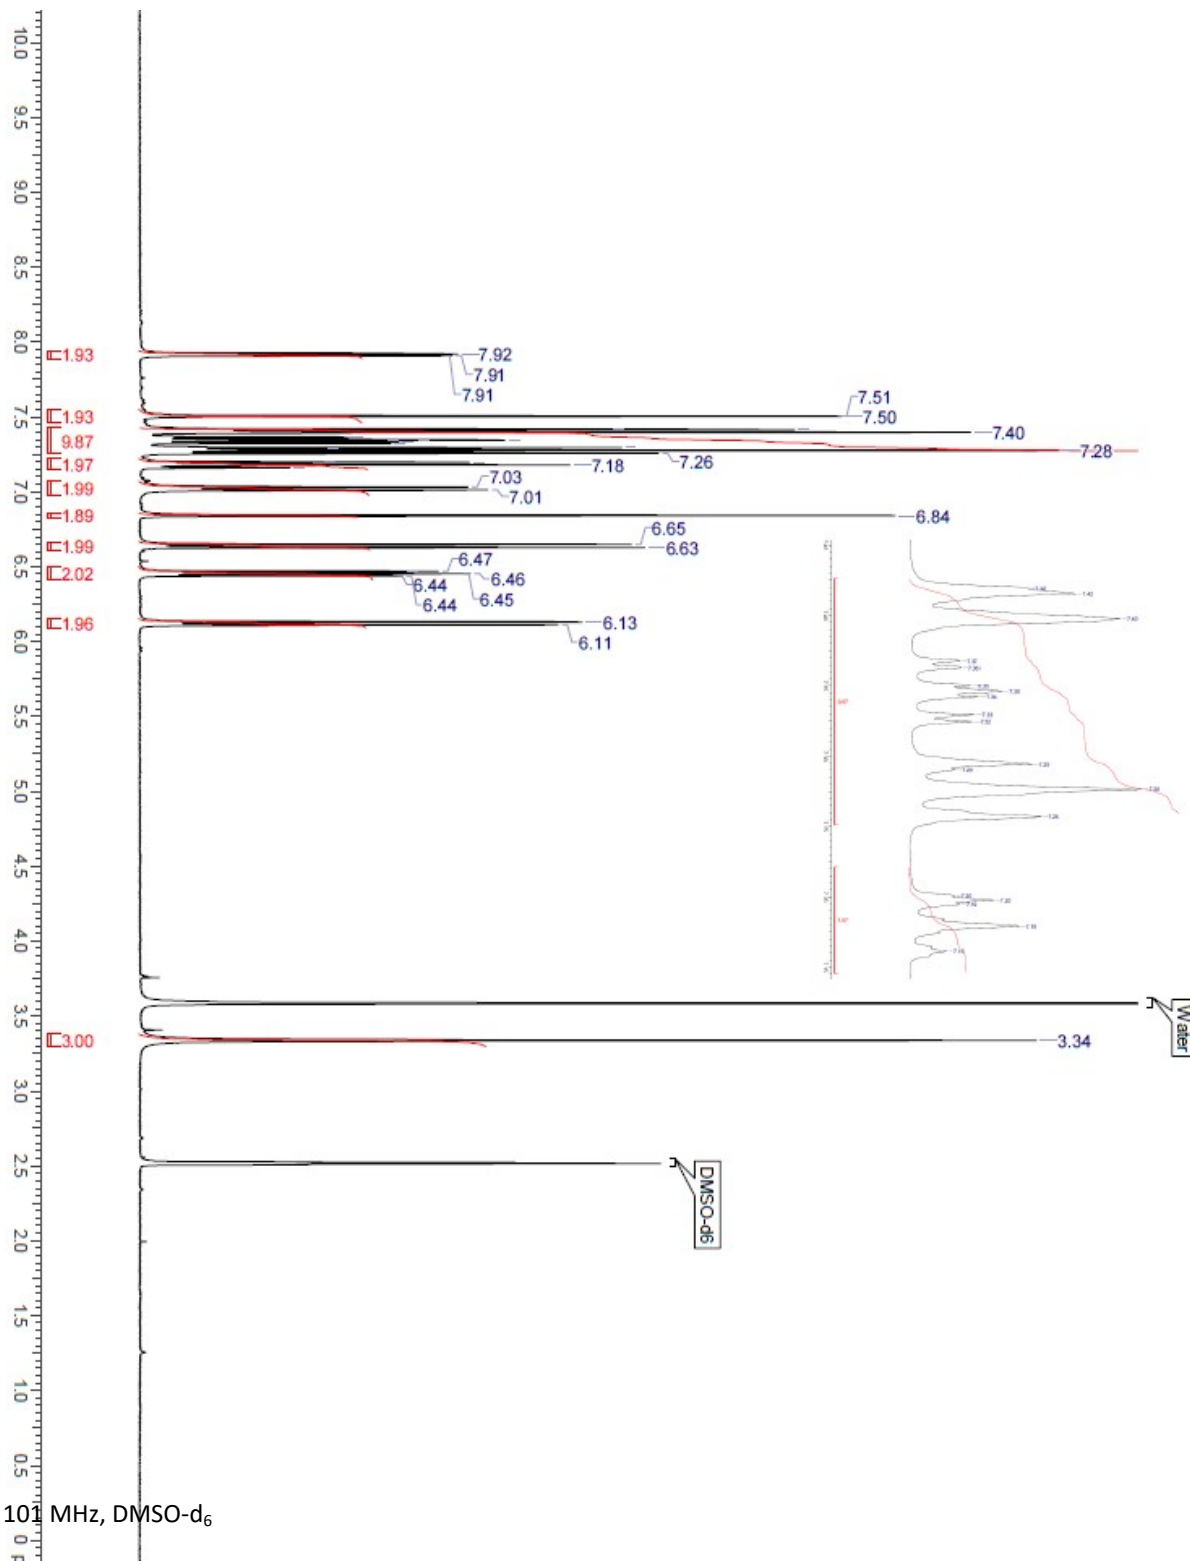

Compound 9w 400 MHz, DMSO-d<sub>6</sub>

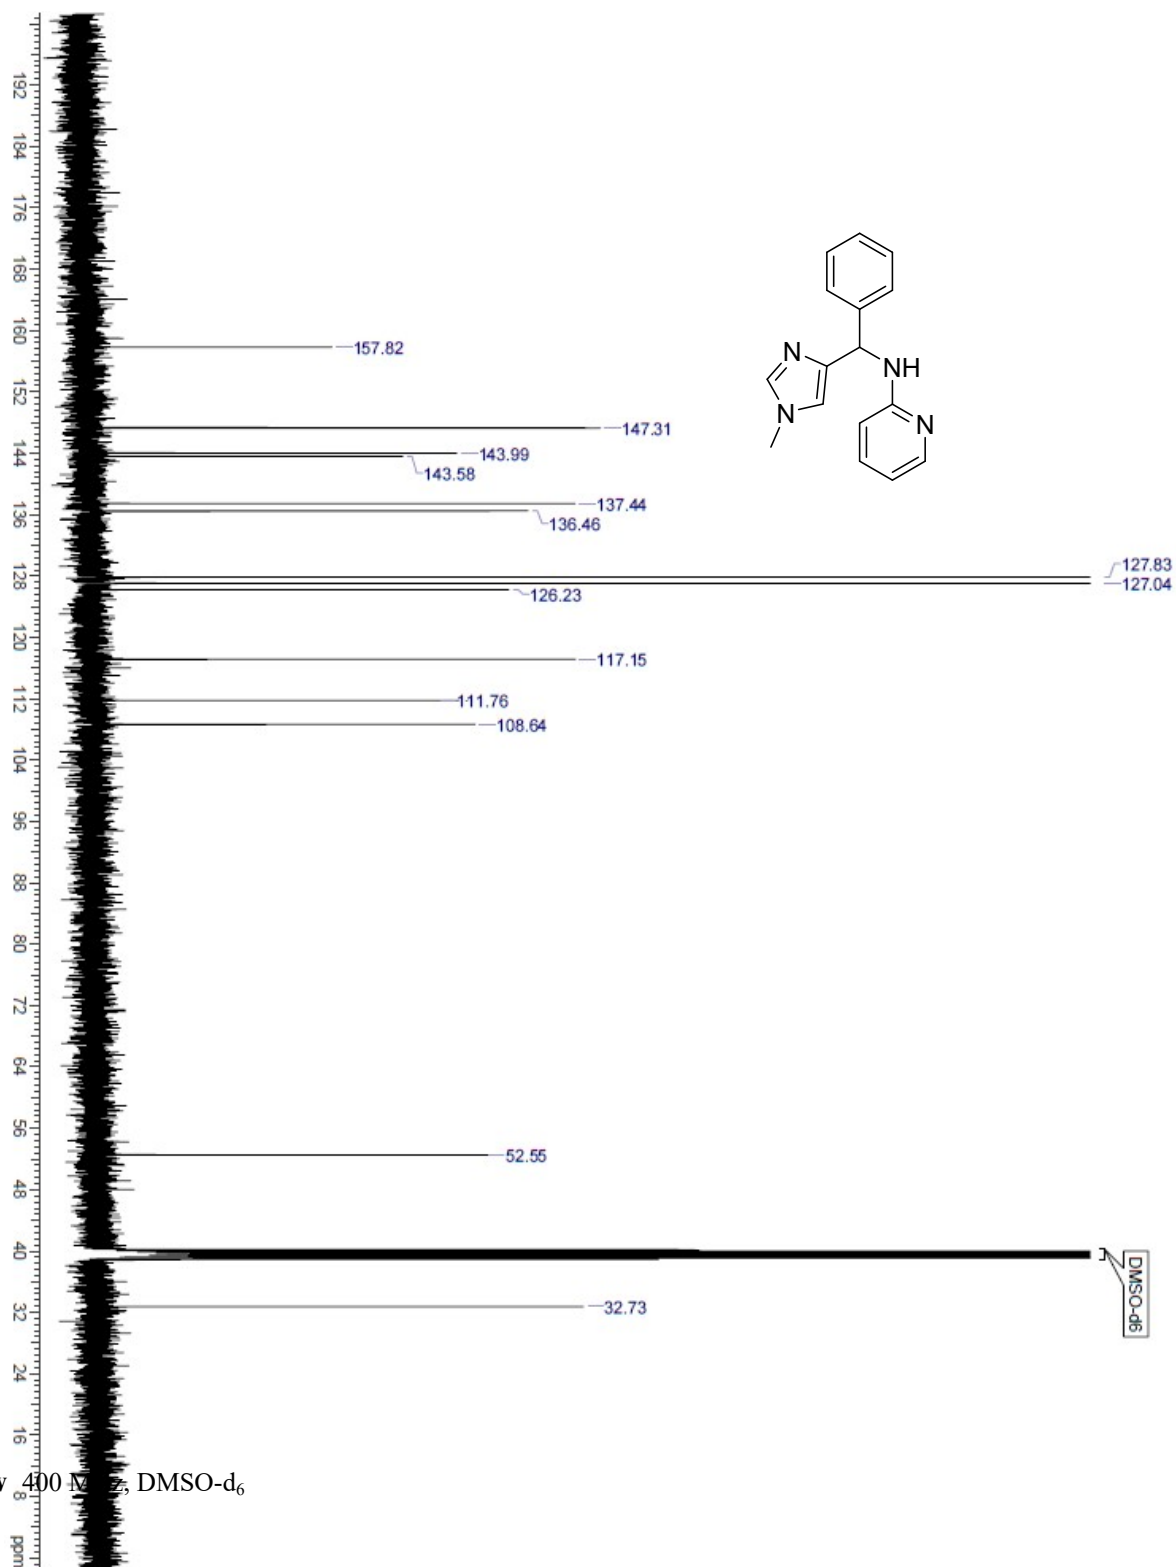



Compound 9x 400 MHz, DMSO-d<sub>6</sub>

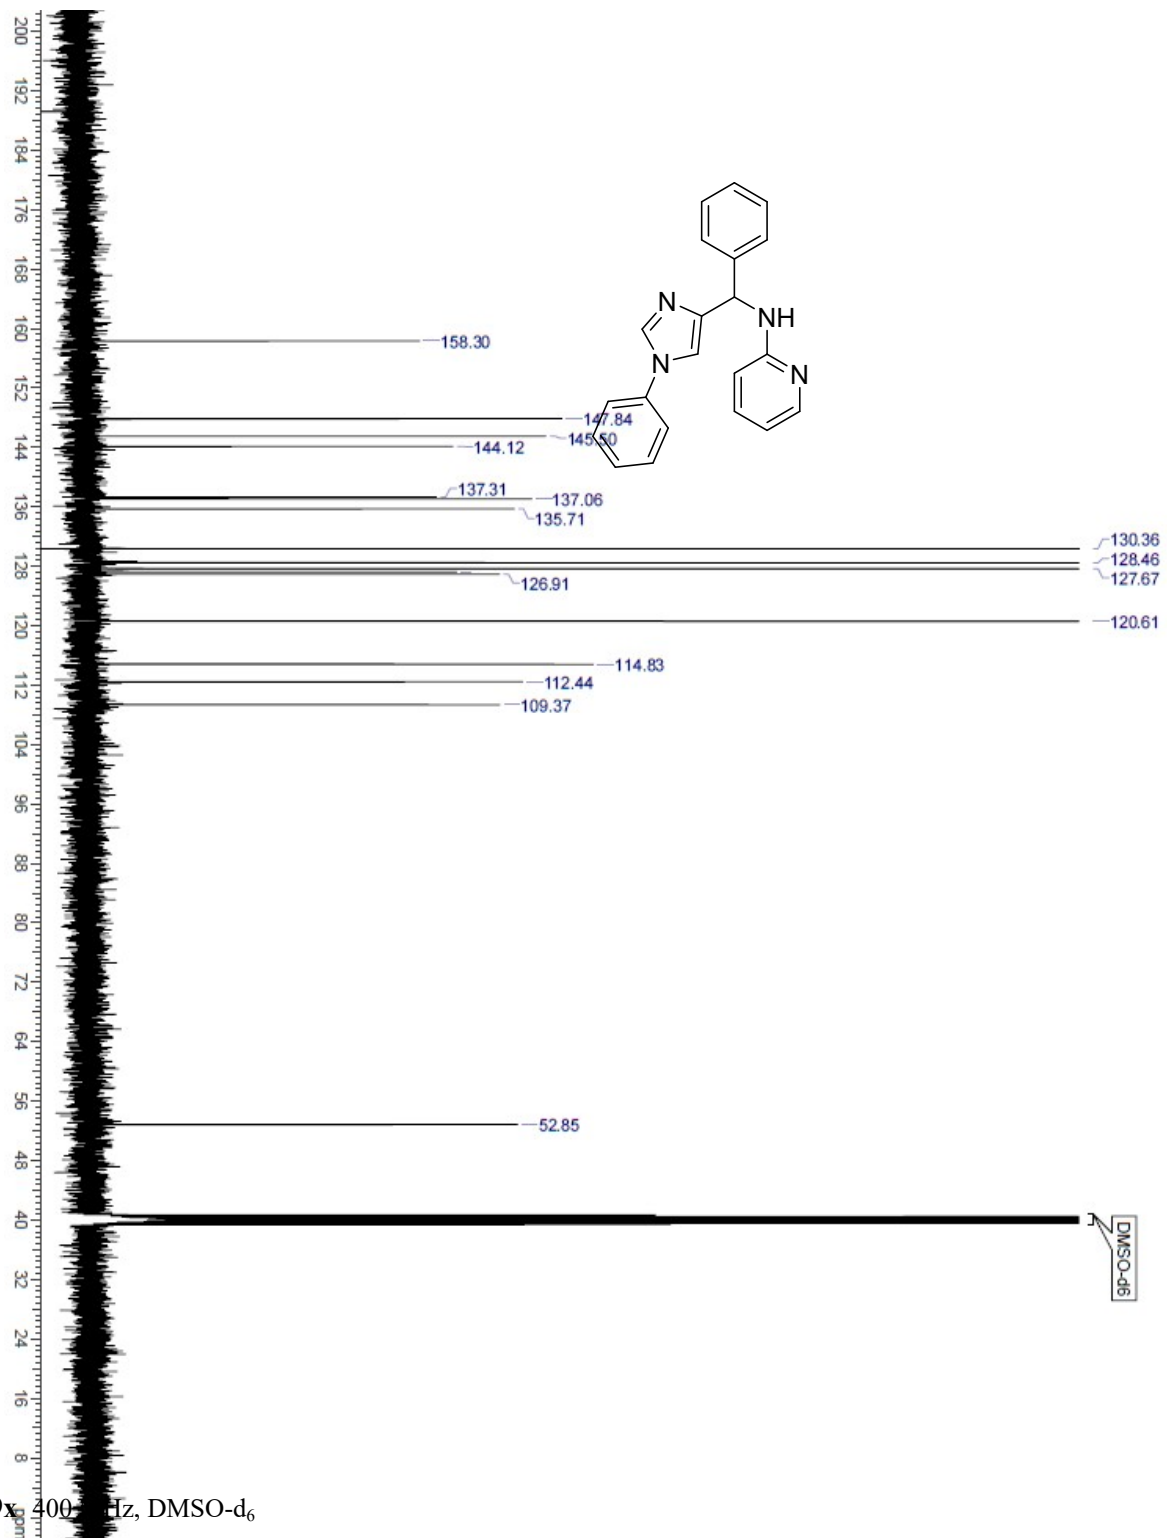

Compound 9x 101 MHz, DMSO-d<sub>6</sub>

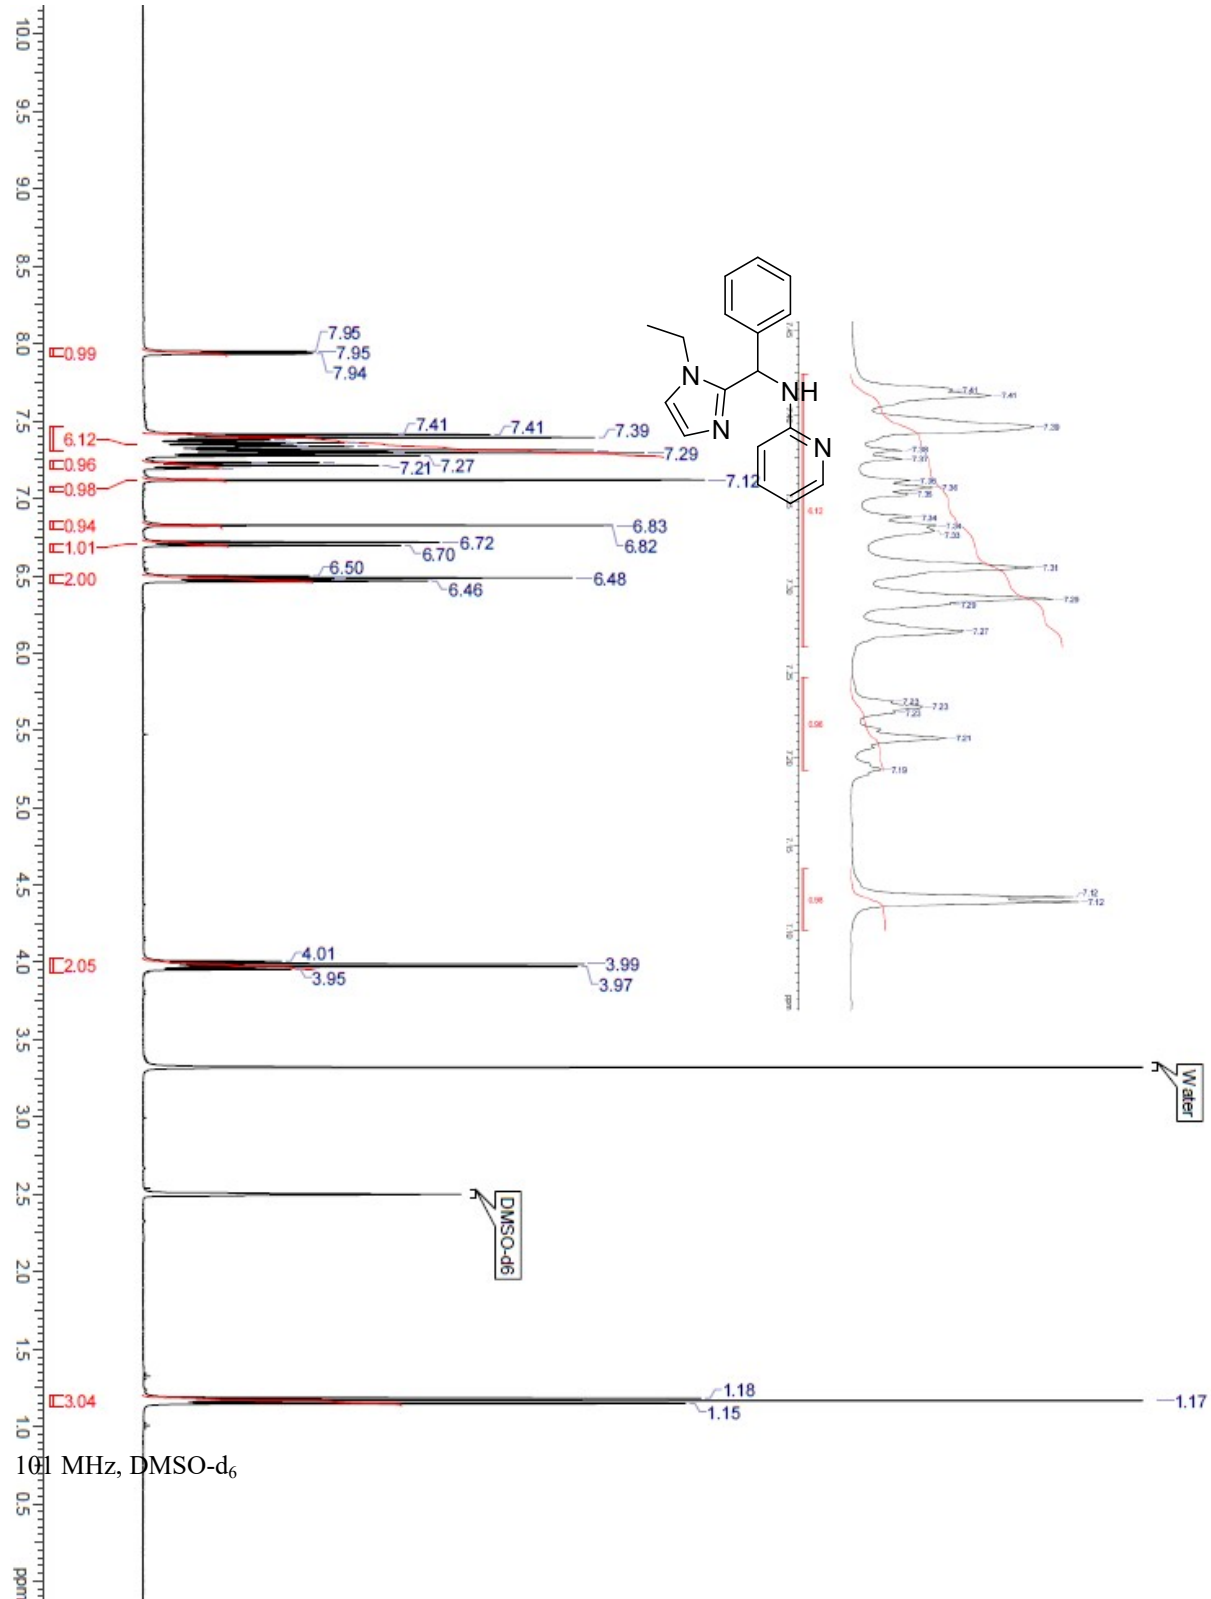

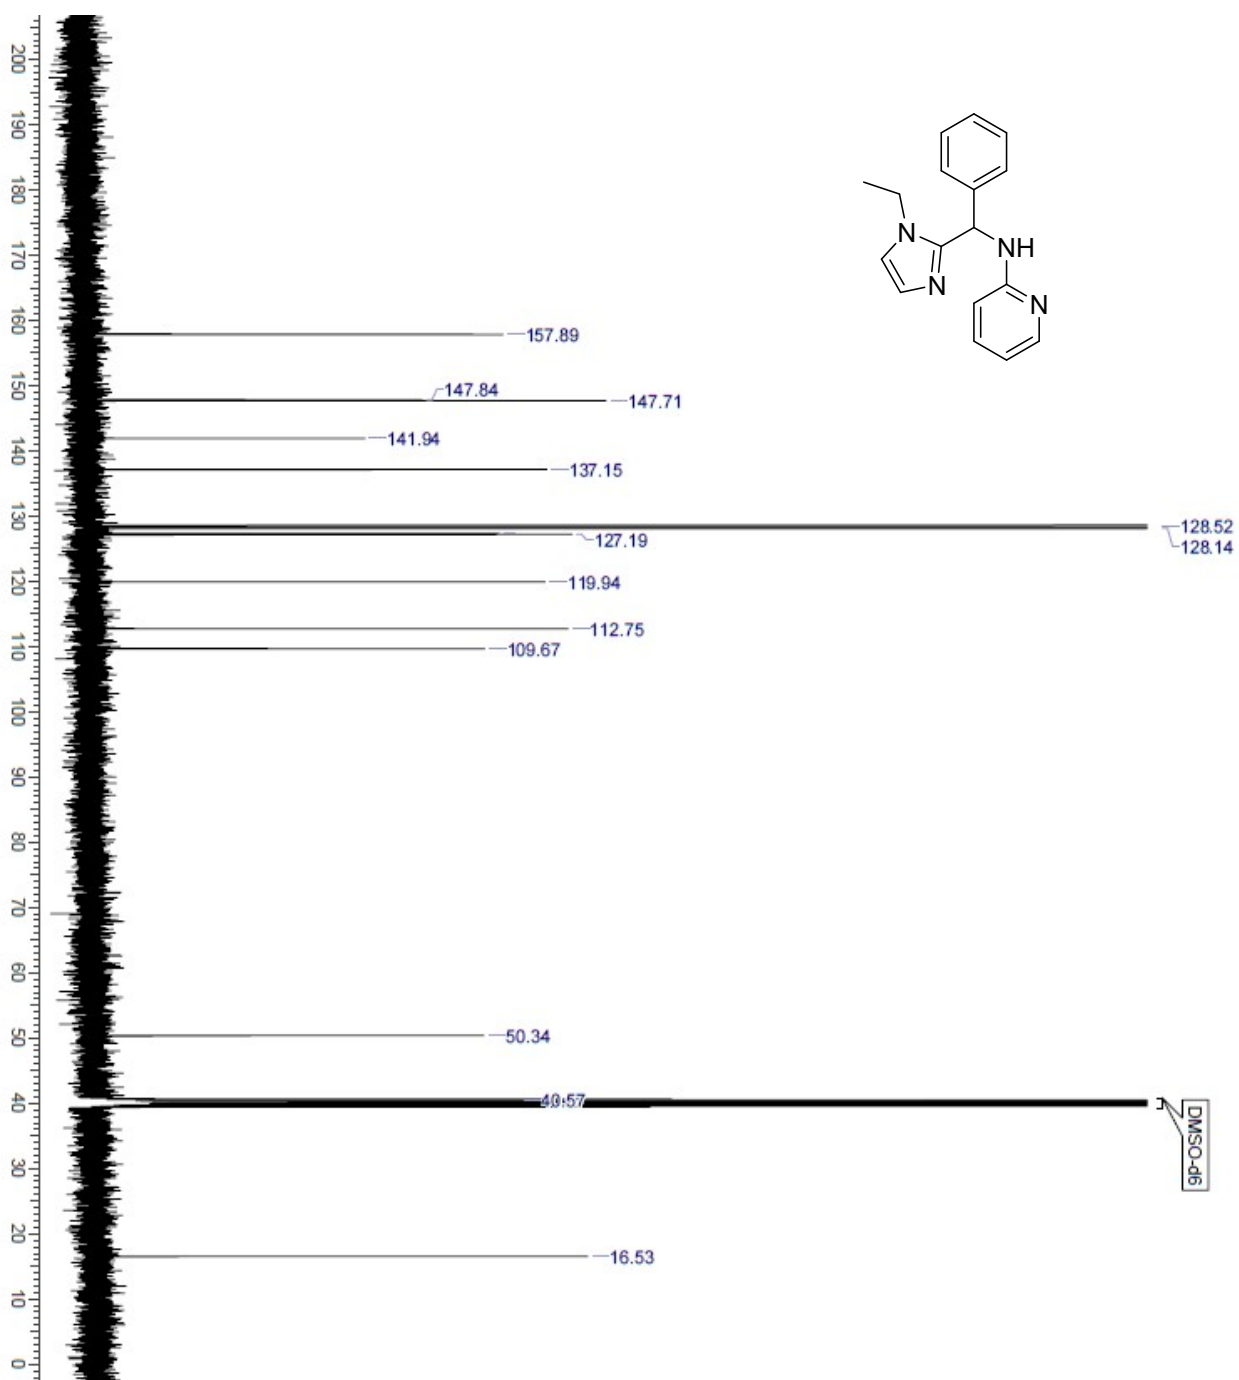

Compound 9aa 400 MHz, DMSO-d<sub>6</sub>

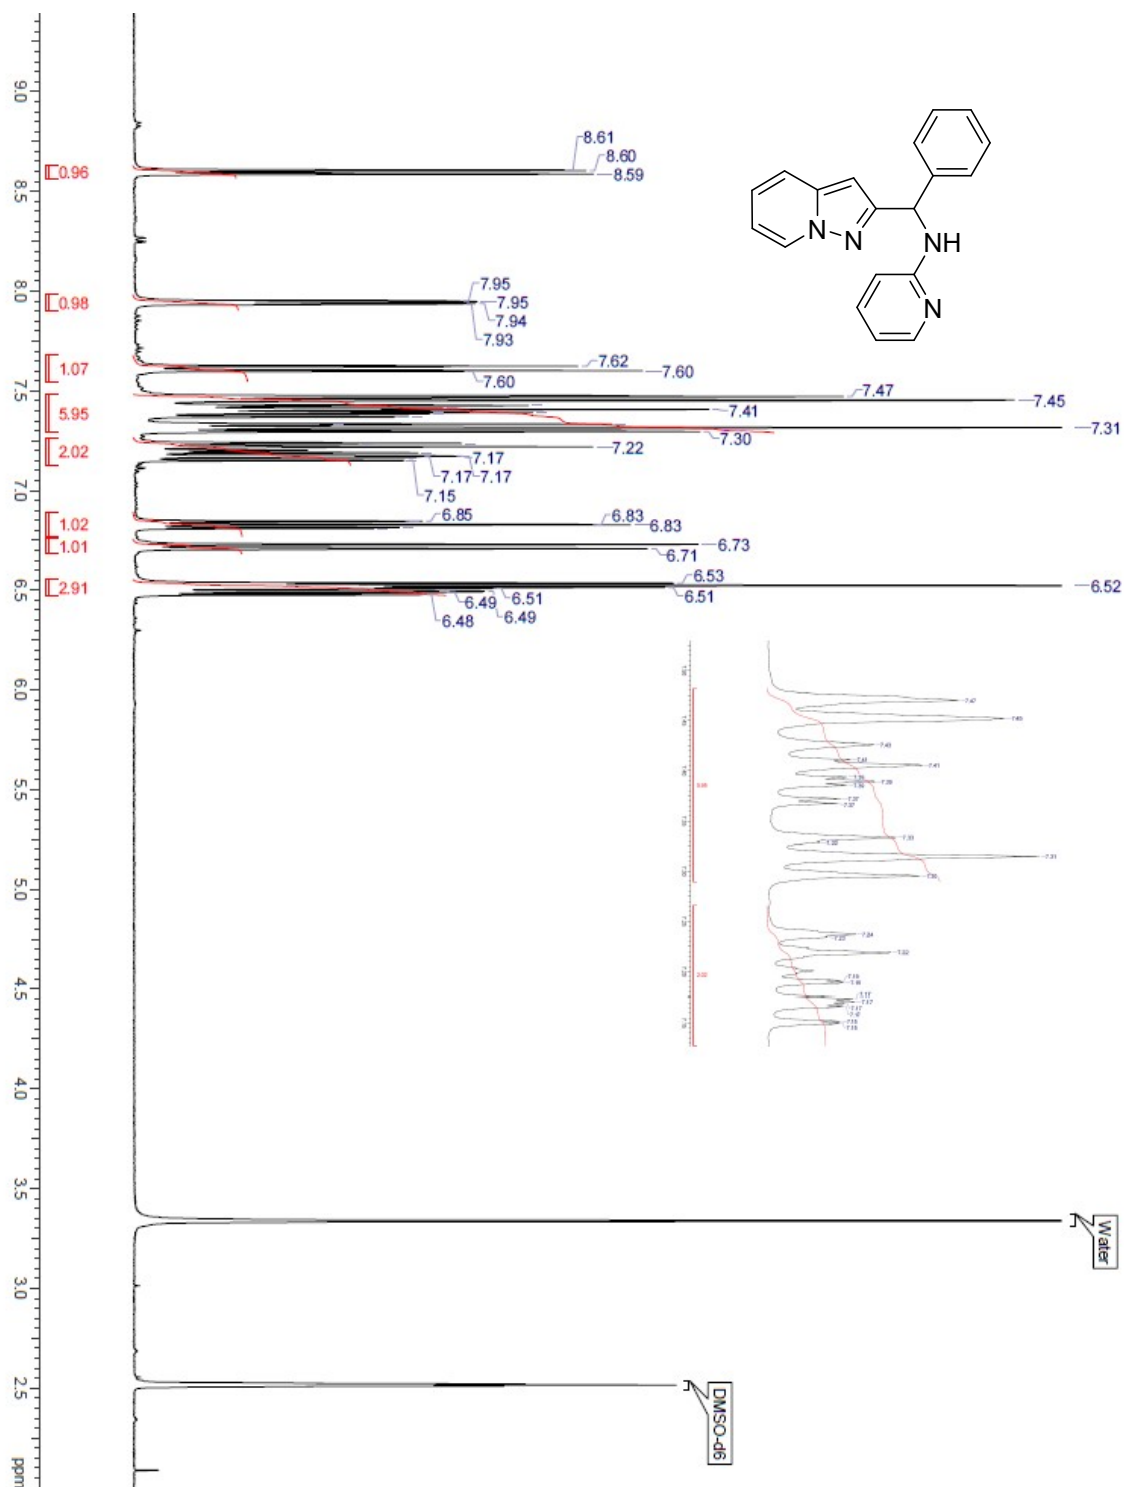

**Compound 9aa** 101 MHz, DMSO-d<sub>6</sub>

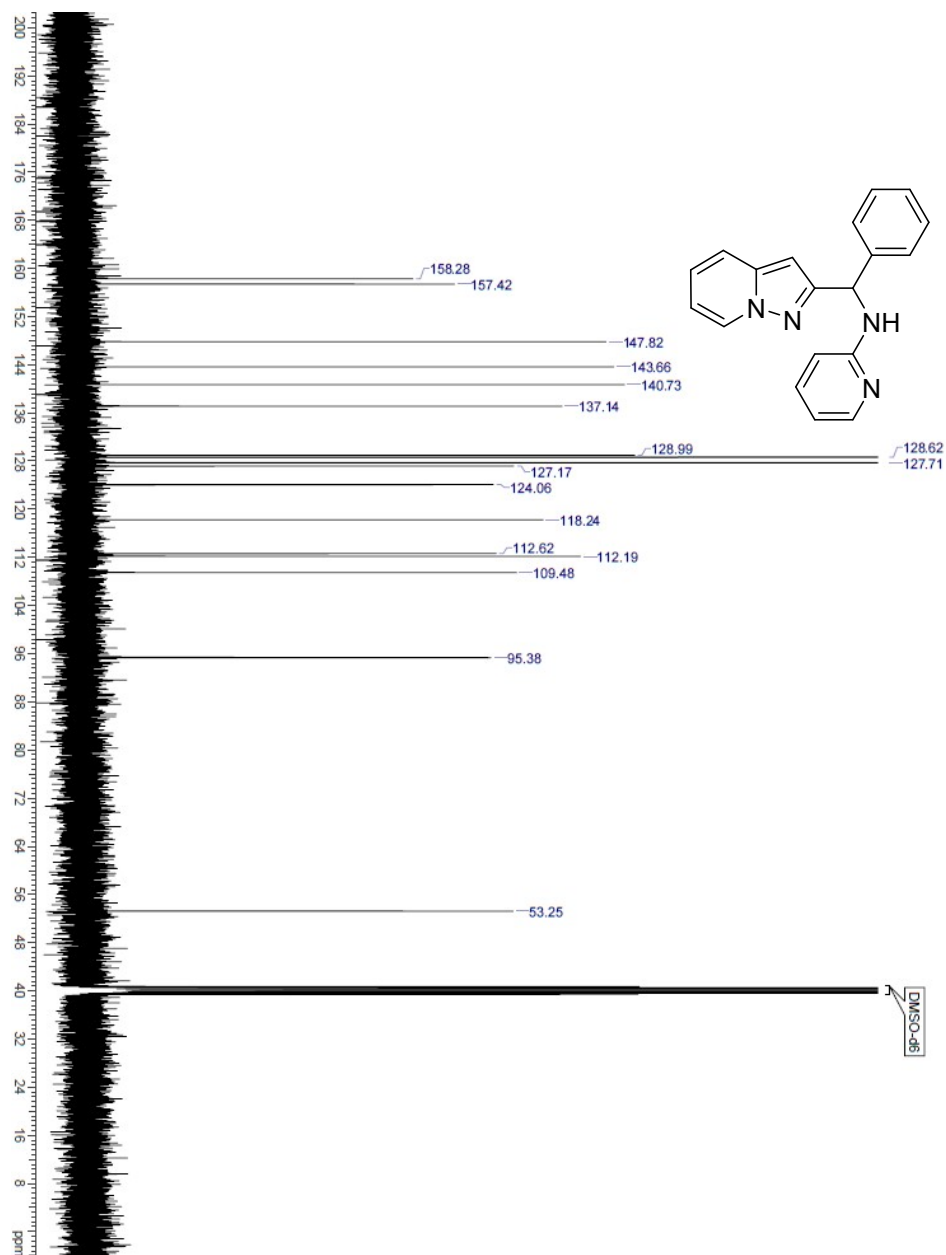

**Compound 9ac** 400 MHz, DMSO-d<sub>6</sub>

Compound 9ac 101 MHz, DMSO-d<sub>6</sub>

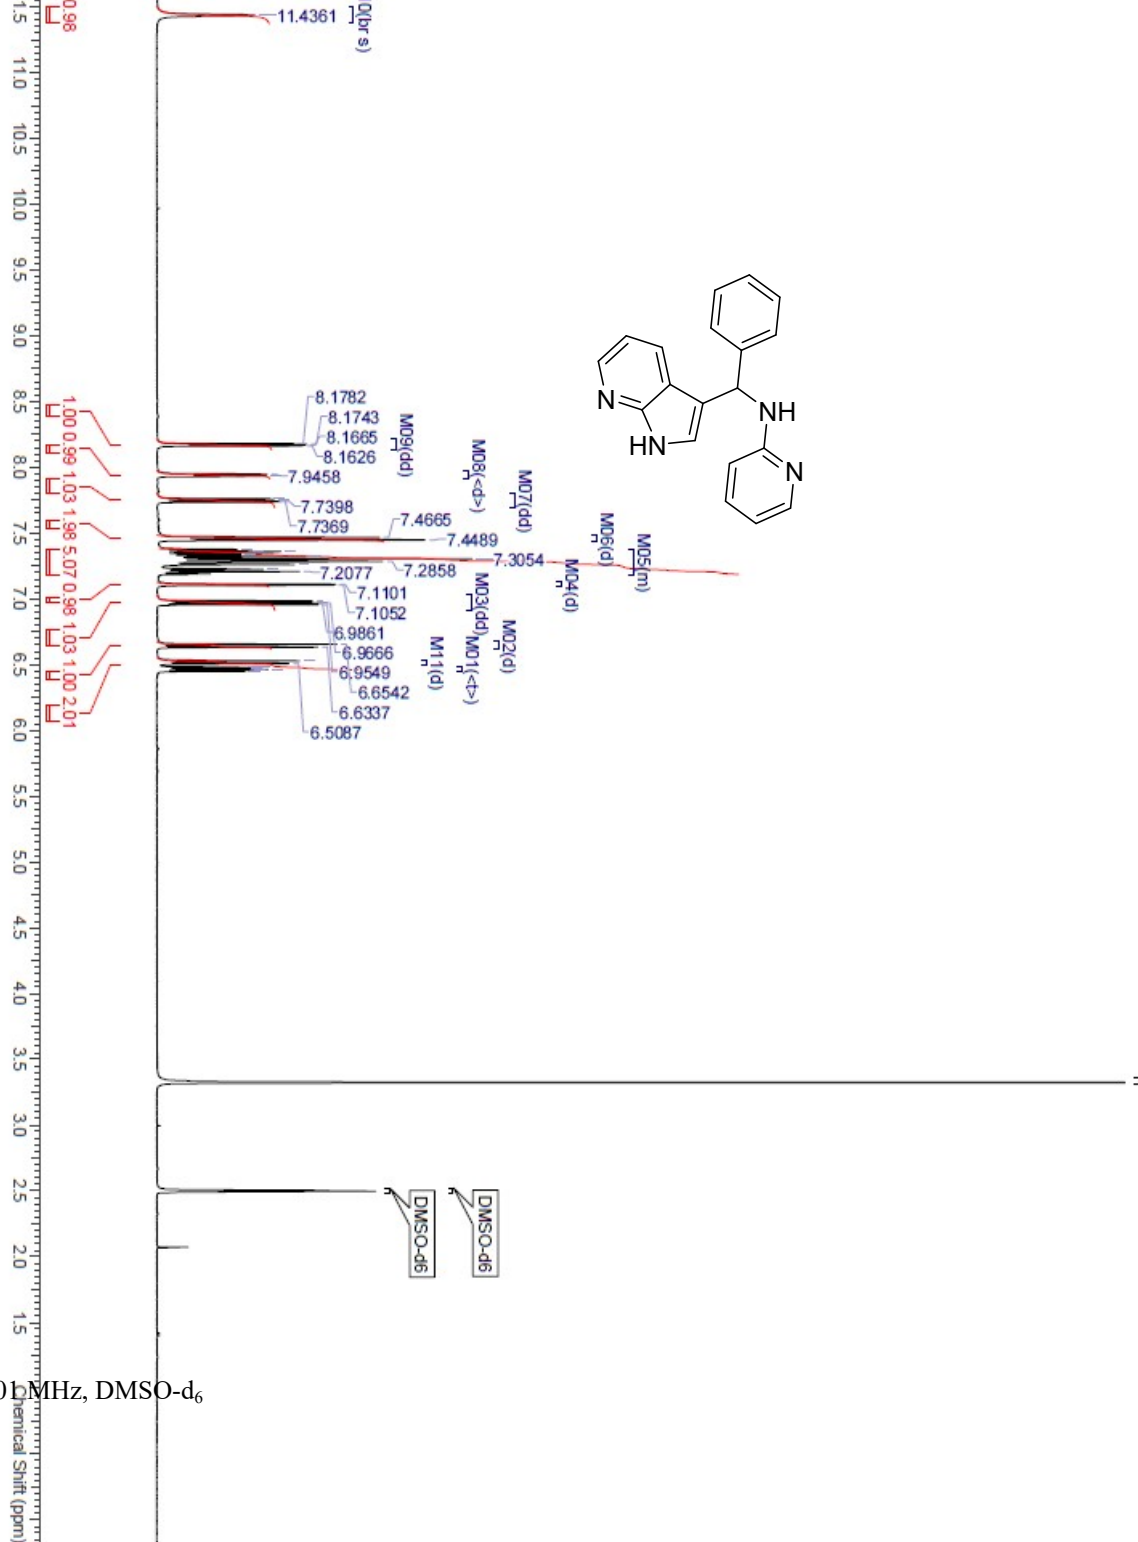

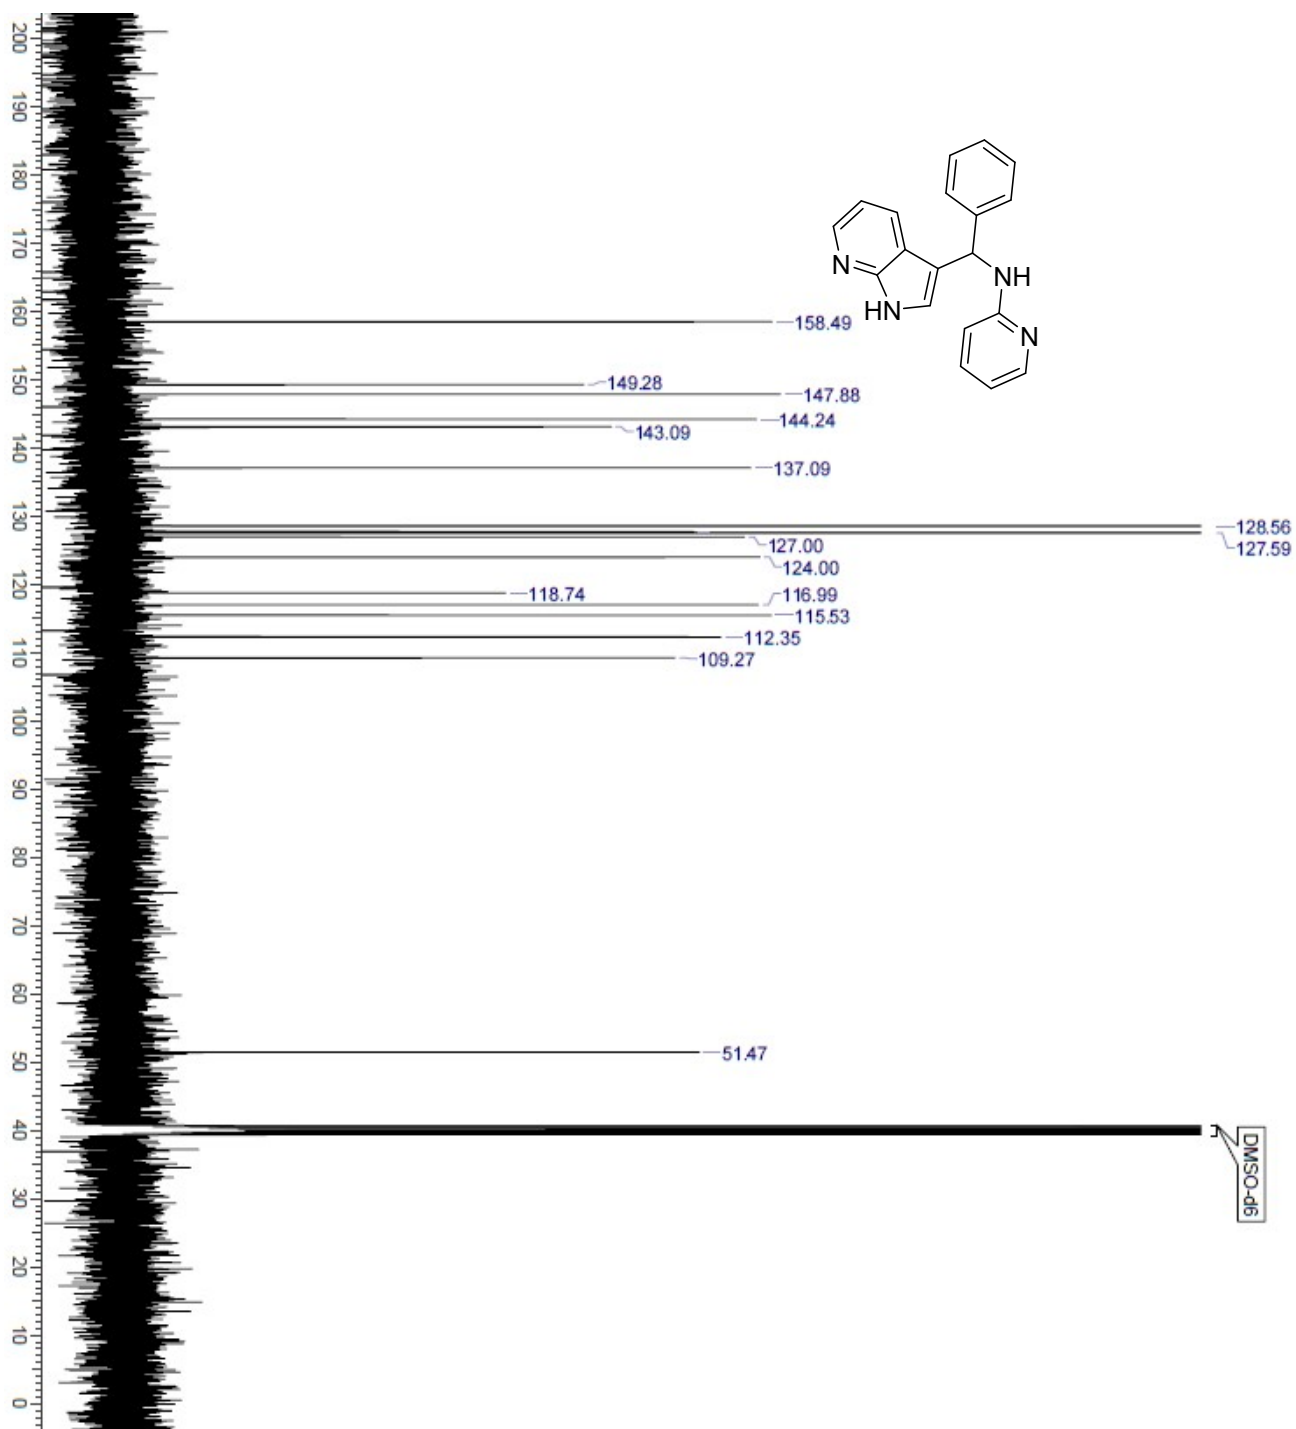

Supplement: d2ob00155a1.pdf [file d2ob00155a1.pdf]
